# Supplementary material for: Sequence and Structure Properties Uncover the Natural Classification of Protein Complexes Formed by Intrinsically Disordered Proteins via Mutual Synergistic Folding
Source: Preprints.org preprint supplement (doi:10.20944/preprints201910.0124.v1), 2019-10-11
Supplement: Supplementary file 1 [file Supplementary Tables S1-S9.xlsx]

## Sheet: Table S1
IDs				Sequence composition								Structural properties																								Cluster number		Complex type	Interaction energies		Kd
MFIB ID	UniProt regions in the complex	PDB ID	PBD chain IDs	Aromatic (FWY)	Hydrophobic (AILMV)	Flexible (G)	Rigid (P)	Charged (HKRDE)	Polar (NQST)	Cysteine (C)	Dissimilarity between subunits (Δtotal)	Secondary structures			Molecular surfaces								Atomic contacts													Sequence-based	Structure-based		Etot/res	Eint/Etot
												SSa	SSb	SSc	SASA/H	SASA/P	INT/H	INT/P	BUR/H	BUR/P	INT/TOT	BUR/TOT	interHH	interHP	interPP	interBB	interBS	interSS	intraHH	intraHP	intraPP	intraBB	intraBS	intraSS	inter/total
MF2120001	P22995(2-35), P22995(2-35)	2an7	AB	0.0294	0.3824	0.0294	0	0.2647	0.2941	0	0	0.662	0.206	0.132	0.502	0.498	0.675	0.325	0.54	0.46	0.193	0.461	0.582	0.354	0.064	0.188	0.42	0.392	0.407	0.484	0.109	0.377	0.389	0.233	0.344	1	3	3	-0.54	0.437	5.7e-08
MF2120002	O25010(31-73), O25010(31-73)	1x93	AB	0.1163	0.3023	0.0233	0	0.3721	0.186	0	0	0.616	0.163	0.221	0.473	0.527	0.772	0.228	0.523	0.477	0.192	0.377	0.643	0.299	0.057	0.165	0.244	0.591	0.401	0.474	0.125	0.414	0.379	0.206	0.291	2	3	3	-0.519	0.699	1.7e-08
MF2120003	Q9ZLR7(23-61), Q9ZLR7(23-61)	2k1o	AB	0.1026	0.3077	0	0	0.3846	0.2051	0	0	0.641	0.205	0.154	0.513	0.487	0.743	0.257	0.532	0.468	0.203	0.411	0.584	0.364	0.052	0.174	0.302	0.524	0.372	0.501	0.127	0.422	0.403	0.175	0.291	2	5	6	-0.476	0.66	3.7e-10
MF2120004	Q9KJ82(33-76), Q9KJ82(33-76)	1p94	AB	0.0682	0.2727	0.0227	0	0.3864	0.2273	0.0227	0	0.636	0.159	0.205	0.475	0.525	0.681	0.319	0.525	0.475	0.252	0.388	0.63	0.307	0.063	0.14	0.257	0.603	0.364	0.511	0.125	0.43	0.386	0.184	0.365	2	3	3	-0.455	0.663	3.5e-11
MF2100001	P01270(32-65), P01270(32-65)	1et1	AB	0.0588	0.3235	0.0294	0	0.3529	0.2353	0	0	0.912	0	0.088	0.642	0.358	0.902	0.098	0.412	0.588	0.063	0.401	0.57	0.333	0.097	0	0.022	0.978	0.339	0.519	0.141	0.403	0.442	0.155	0.129	2	2	2	-0.182	0.655	8.7e-05
MF2200001	P05387(4-59), P05386(3-63)	4beh	AB	0.0427	0.4359	0.0684	0.0256	0.2222	0.188	0.0171	0.287	0.627	0.008	0.364	0.545	0.455	0.764	0.236	0.615	0.385	0.099	0.572	0.751	0.227	0.022	0.013	0.41	0.576	0.454	0.446	0.099	0.334	0.417	0.249	0.122	4	4	4	-0.753	0.267	1.1e-07
MF2100002	P05387(3-56), P05387(3-56)	2w1o	AB	0.037	0.4074	0.0741	0.0185	0.2778	0.1852	0	0	0.712	0	0.288	0.474	0.526	0.784	0.216	0.591	0.409	0.108	0.598	0.759	0.232	0.009	0.066	0.461	0.473	0.481	0.417	0.102	0.32	0.396	0.284	0.131	4	5	5	-0.591	0.46	1.9e-07
MF2201001	Q9Y6Q9(1050-1082), P45481(2062-2110)	1kbh	AB	0.0244	0.378	0.0244	0.061	0.2073	0.3049	0	0.596	0.671	0	0.329	0.685	0.315	0.768	0.232	0.44	0.56	0.205	0.523	0.69	0.265	0.045	0.024	0.31	0.667	0.363	0.503	0.134	0.349	0.423	0.228	0.237	1	5	6	-0.577	0.692	1.7e-11
MF4210001	Q62696(4-61), Q62915(340-394), Q62696(4-61), Q62915(340-394)	1rso	ABCD	0.0708	0.3363	0	0	0.3274	0.2566	0.0088	0.213	0.743	0.044	0.212	0.471	0.529	0.772	0.228	0.517	0.483	0.194	0.51	0.68	0.279	0.041	0.048	0.321	0.631	0.418	0.472	0.11	0.334	0.453	0.214	0.239	2	5	6	-0.421	0.554	5.1e-14
MF2201002	P04637(18-55), P45481(2063-2108)	2l14	AB	0.0595	0.3333	0	0.0952	0.1786	0.3333	0	0.32	0.631	0	0.369	0.595	0.405	0.817	0.183	0.524	0.477	0.155	0.451	0.737	0.222	0.04	0	0.303	0.697	0.359	0.499	0.141	0.353	0.463	0.184	0.19	1	4	4	-0.327	0.582	1.6e-07
MF2201003	Q15788(928-974), P45481(2062-2113)	2c52	AB	0.0404	0.3535	0.0505	0.0505	0.2323	0.2727	0	0.664	0.505	0	0.495	0.558	0.442	0.741	0.259	0.547	0.453	0.119	0.526	0.707	0.241	0.052	0	0.315	0.685	0.442	0.46	0.099	0.328	0.45	0.221	0.125	1	4	4	-0.299	0.386	5.2e-07
MF4120001	P9WF24(2-66), P9WF24(1-68), P9WF24(1-86), P9WF24(2-84)	3cto	ABCD	0.0596	0.3642	0.0199	0.0397	0.298	0.2185	0	0.116	0.632	0.152	0.215	0.515	0.485	0.731	0.269	0.487	0.514	0.217	0.463	0.578	0.347	0.075	0.091	0.341	0.568	0.332	0.524	0.144	0.418	0.413	0.169	0.274	4	5	5	-0.301	0.489	2.7e-14
MF2140001	P03050(8-46), P03050(8-46)	1arq	AB	0.1026	0.2821	0.0256	0.0513	0.3333	0.2051	0	0	0.692	0.128	0.179	0.578	0.422	0.647	0.353	0.474	0.526	0.248	0.471	0.567	0.349	0.084	0.104	0.3	0.596	0.353	0.505	0.142	0.373	0.405	0.222	0.302	4	3	3	-0.506	0.65	1.8e-10
MF2120005	A5ZMD8(5-98), A5ZMD8(2-97)	3frw	AB	0.0947	0.2737	0.0368	0	0.3368	0.2263	0.0316	0.047	0.774	0	0.226	0.546	0.454	0.696	0.304	0.509	0.491	0.171	0.466	0.588	0.322	0.089	0.009	0.388	0.603	0.389	0.492	0.119	0.359	0.403	0.237	0.245	2	5	6	-0.428	0.559	3.8e-12
MF2120006	P13920(1-43), P13920(1-45)	2cpg	AB	0.0227	0.3864	0.0455	0	0.3182	0.2273	0	0.062	0.659	0.205	0.136	0.562	0.438	0.728	0.272	0.501	0.5	0.224	0.391	0.566	0.362	0.072	0.175	0.305	0.52	0.367	0.509	0.125	0.432	0.365	0.203	0.302	1	3	3	-0.492	0.67	1.5e-08
MF2120007	P0AG12(32-139), P0AG12(32-139)	1ay9	AB	0.0556	0.4074	0.0648	0.037	0.2222	0.213	0	0	0.102	0.37	0.528	0.622	0.378	0.75	0.25	0.584	0.416	0.032	0.577	0.639	0.311	0.05	0.227	0.303	0.471	0.471	0.425	0.104	0.313	0.354	0.333	0.047	4	1	1	-0.279	0.092	7.1e-05
MF4100001	P02766(30-144), P02766(30-144), P02766(30-145), P02766(30-145)	3a4d	ABCD	0.1039	0.3203	0.0606	0.0563	0.2511	0.1991	0.0087	0.016	0.061	0.528	0.411	0.56	0.44	0.652	0.348	0.612	0.388	0.087	0.643	0.546	0.383	0.071	0.224	0.32	0.456	0.461	0.439	0.1	0.297	0.347	0.356	0.128	4	1	1	-0.129	0.217	5.8e-07
MF4110001	P02767(28-147), P02767(28-147), P02767(28-147), P02767(28-147)	1gke	ABCD	0.1083	0.3	0.0667	0.05	0.25	0.2167	0.0083	0	0.054	0.458	0.487	0.555	0.445	0.667	0.333	0.609	0.391	0.08	0.637	0.549	0.372	0.079	0.214	0.343	0.443	0.465	0.431	0.103	0.288	0.36	0.352	0.114	4	1	1	-0.141	0.234	8.3e-12
MF4110002	Q9PTT3(33-148), Q9PTT3(33-148), Q9PTT3(33-148), Q9PTT3(33-148)	1oo2	ABCD	0.0948	0.319	0.0776	0.0517	0.2069	0.2414	0.0086	0	0.093	0.5	0.407	0.575	0.425	0.671	0.329	0.607	0.393	0.087	0.638	0.54	0.382	0.077	0.227	0.341	0.433	0.46	0.44	0.099	0.296	0.354	0.35	0.134	3	1	1	-0.154	0.236	1.2e-11
MF4201001	Q63ZW7(7-62), Q8N3R9(120-174), Q63ZW7(7-62), Q8N3R9(120-174)	1y76	ABCD	0.0541	0.3333	0.027	0.009	0.2703	0.3063	0	0.143	0.869	0	0.131	0.536	0.464	0.78	0.22	0.516	0.484	0.177	0.535	0.682	0.268	0.051	0	0.267	0.733	0.423	0.47	0.106	0.349	0.442	0.209	0.189	1	4	4	-0.459	0.605	9e-11
MF4201002	Q8NI35(10-67), Q8NI35(12-67), Q9JLB2(123-170), Q9JLB2(123-170)	1vf6	ABCD	0.0571	0.3286	0.019	0.0095	0.2571	0.3286	0	0.118	0.843	0	0.157	0.574	0.426	0.809	0.191	0.48	0.52	0.16	0.49	0.661	0.28	0.059	0	0.238	0.762	0.369	0.498	0.133	0.402	0.402	0.196	0.169	1	4	4	-0.428	0.602	1.2e-09
MF4210002	O70589(405-454), O88951(8-64), O88951(8-64), O70589(405-454)	1y74	ABCD	0.0561	0.3551	0.0187	0.0374	0.3178	0.1963	0.0187	0.131	0.836	0	0.164	0.48	0.52	0.79	0.21	0.518	0.482	0.184	0.487	0.698	0.263	0.039	0	0.311	0.689	0.392	0.491	0.117	0.376	0.454	0.169	0.236	4	5	5	-0.47	0.697	1.9e-09
MF2201004	P90976(122-162), O14936(406-444)	1zl8	AB	0.0625	0.35	0.025	0.025	0.3	0.225	0.0125	0.284	0.783	0	0.217	0.501	0.499	0.838	0.162	0.513	0.487	0.144	0.517	0.781	0.203	0.016	0.011	0.31	0.679	0.43	0.46	0.11	0.345	0.456	0.2	0.218	4	5	5	-0.596	0.497	4.6e-09
MF2140002	P06465(43-93), P06465(43-93)	2b9d	AC	0.0392	0.4314	0	0.0392	0.1961	0.2157	0.0784	0	0.255	0.373	0.373	0.59	0.41	0.66	0.34	0.596	0.404	0.099	0.511	0.508	0.42	0.071	0.202	0.286	0.513	0.463	0.438	0.098	0.356	0.382	0.262	0.157	1	1	6	-0.577	0.309	-
MF2110001	Q28021(979-1044), Q28021(979-1045)	1uix	AB	0.015	0.3609	0	0	0.3534	0.2707	0	0.019	0.956	0	0.044	0.633	0.367	0.879	0.121	0.315	0.685	0.134	0.439	0.733	0.242	0.025	0.006	0.345	0.649	0.286	0.559	0.155	0.518	0.415	0.067	0.154	2	2	2	-0.012	0.848	7.3e-08
MF2120008	P0A881(8-108), P0A881(8-108)	3wrp	AB	0.0396	0.3861	0.0495	0.0297	0.3069	0.1881	0	0	0.762	0	0.238	0.53	0.47	0.737	0.263	0.54	0.461	0.132	0.528	0.614	0.294	0.092	0.018	0.319	0.664	0.39	0.484	0.126	0.374	0.392	0.234	0.147	4	4	4	-0.414	0.589	-
MF2100003	O75496(92-152), O75496(92-152)	1uii	AB	0.0656	0.2951	0	0.0164	0.4754	0.1475	0	0	0.943	0	0.057	0.556	0.444	0.744	0.256	0.421	0.579	0.153	0.392	0.595	0.346	0.06	0.01	0.33	0.66	0.318	0.542	0.139	0.487	0.401	0.112	0.217	2	2	2	-0.171	0.903	5.3e-07
MF2110002	P04386(52-98), P04386(52-98)	1hbw	AB	0.0638	0.4468	0.0213	0.0213	0.3191	0.1277	0	0	0.617	0	0.383	0.654	0.346	0.775	0.225	0.486	0.514	0.142	0.391	0.702	0.286	0.013	0	0.397	0.603	0.389	0.488	0.123	0.44	0.395	0.165	0.25	4	5	5	-0.21	0.363	6.4e-08
MF2110003	P36094(67-128), P36094(67-131)	2q6q	AB	0.0472	0.2835	0	0	0.4094	0.2598	0	0.07	0.913	0	0.087	0.582	0.418	0.817	0.183	0.407	0.593	0.15	0.41	0.7	0.258	0.042	0	0.28	0.72	0.313	0.549	0.138	0.468	0.428	0.104	0.176	2	2	2	-0.29	0.707	1.7e-07
MF2120009	D0VWZ2(9-136), D0VWZ2(9-136)	3hnw	AB	0.0781	0.3281	0.0312	0	0.3672	0.1953	0	0	0.797	0.07	0.133	0.577	0.423	0.815	0.185	0.448	0.552	0.138	0.446	0.724	0.253	0.023	0.003	0.277	0.72	0.325	0.53	0.145	0.415	0.42	0.165	0.155	2	2	2	-0.305	0.746	1.9e-11
MF2200002	D6RGH6(179-244), O75496(92-160)	4bry	AB	0.0444	0.3333	0.0148	0.0074	0.3926	0.2074	0	0.375	0.92	0	0.08	0.608	0.392	0.75	0.25	0.395	0.605	0.124	0.4	0.6	0.332	0.068	0.008	0.322	0.671	0.278	0.571	0.151	0.498	0.386	0.116	0.161	2	2	2	-0.113	0.712	5.5e-08
MF2110004	Q54HG2(243-343), Q54HG2(243-343)	1d7m	AB	0	0.3762	0.0198	0	0.4455	0.1584	0	0	0.98	0	0.02	0.589	0.411	0.794	0.206	0.372	0.628	0.171	0.414	0.661	0.292	0.047	0.001	0.289	0.709	0.286	0.571	0.143	0.511	0.401	0.088	0.188	2	2	2	-0.212	0.834	3.4e-10
MF2120010	Q3YXW0(4-109), Q3YXW0(2-109)	4p1m	AB	0.0467	0.3224	0.0187	0.028	0.2804	0.2944	0.0093	0.014	0.709	0.122	0.169	0.537	0.463	0.757	0.243	0.465	0.535	0.098	0.459	0.675	0.273	0.052	0	0.259	0.741	0.344	0.517	0.139	0.423	0.388	0.189	0.115	1	4	4	-0.274	0.634	1.4e-08
MF2120011	P0AF36(3-81), P0AF36(3-81)	2jee	AB	0.0253	0.3165	0.0253	0	0.3544	0.2785	0	0	0.949	0	0.051	0.528	0.472	0.763	0.237	0.395	0.605	0.163	0.392	0.61	0.335	0.055	0	0.392	0.608	0.287	0.566	0.147	0.509	0.397	0.094	0.182	2	2	2	-0.146	1	5.4e-10
MF2110005	Q03818(60-118), Q03818(61-114)	3a7o	AB	0	0.3628	0.0177	0	0.354	0.2655	0	0.032	0.956	0	0.044	0.604	0.396	0.826	0.174	0.381	0.619	0.141	0.42	0.723	0.248	0.029	0	0.284	0.716	0.293	0.564	0.143	0.499	0.426	0.075	0.137	2	2	2	-0.236	0.871	1.9e-07
MF3110001	P05099(459-492), P05099(459-492), P05099(459-492)	1aq5	ABC	0.0294	0.4118	0	0	0.3235	0.2353	0	0	0.919	0	0.081	0.511	0.489	0.891	0.109	0.444	0.556	0.225	0.414	0.777	0.212	0.011	0	0.331	0.669	0.335	0.539	0.127	0.443	0.484	0.073	0.259	1	5	6	-0.36	0.781	8.4e-08
MF3140001	P10104(372-484), P10104(372-484), P10104(372-484)	1aa0	ABC	0.0442	0.3274	0.1062	0.0265	0.1593	0.3363	0	0	0.628	0.088	0.283	0.543	0.457	0.78	0.22	0.439	0.561	0.214	0.442	0.642	0.297	0.06	0.076	0.343	0.582	0.312	0.542	0.146	0.45	0.422	0.128	0.205	3	2	6	-0.219	0.8	-
MF3100001	P35247(224-251), P35247(224-251), P35247(224-251)	1m7l	ABC	0.0714	0.3929	0.0357	0	0.1786	0.3214	0	0	0.867	0	0.133	0.567	0.433	0.769	0.231	0.409	0.591	0.211	0.436	0.668	0.272	0.06	0	0.408	0.592	0.338	0.532	0.13	0.403	0.501	0.096	0.212	1	5	6	-0.55	0.705	5.8e-06
MF3120001	P69780(22-72), P69780(22-74), P69780(22-73)	1jcc	ABC	0	0.3782	0	0	0.2692	0.3526	0	0.035	0.908	0	0.092	0.52	0.48	0.7	0.3	0.301	0.699	0.239	0.374	0.516	0.381	0.103	0.014	0.434	0.552	0.267	0.569	0.164	0.528	0.402	0.069	0.233	1	2	2	-0.031	1	3.1e-11
MF3120002	P75103(51-130), P75103(50-130), P75103(50-130)	2ba2	ABC	0.062	0.2975	0.0455	0	0.2975	0.2975	0	0.024	0.847	0.05	0.103	0.59	0.41	0.731	0.269	0.385	0.615	0.241	0.389	0.601	0.33	0.069	0.061	0.344	0.595	0.32	0.542	0.138	0.461	0.446	0.093	0.288	3	2	6	-0.498	0.863	1.4e-13
MF3100002	Q09013(467-527), Q09013(467-529), Q09013(467-527)	1wt6	ABD	0.0162	0.3459	0	0	0.3892	0.2486	0	0.026	0.944	0	0.056	0.519	0.481	0.763	0.237	0.335	0.665	0.204	0.411	0.642	0.302	0.056	0	0.269	0.731	0.29	0.564	0.146	0.464	0.419	0.117	0.202	2	2	2	-0.126	1	2.6e-09
MF2140003	P69543(1-87), P69543(1-87)	1gvp	AB	0.092	0.3218	0.0805	0.069	0.2069	0.2184	0.0115	0	0.069	0.46	0.471	0.6	0.4	0.825	0.175	0.57	0.43	0.067	0.531	0.738	0.251	0.01	0.073	0.366	0.56	0.45	0.449	0.102	0.264	0.408	0.328	0.088	3	4	4	-0.381	0.457	-
MF2140004	P13848(2-76), P13848(2-78)	1no4	AB	0.0526	0.2895	0.0263	0.0395	0.3618	0.2303	0	0.021	0.868	0	0.132	0.623	0.377	0.741	0.259	0.428	0.572	0.151	0.46	0.622	0.315	0.063	0	0.291	0.709	0.316	0.542	0.142	0.443	0.399	0.157	0.201	2	2	2	-0.2	1	3.8e-09
MF4130001	Q54436(1237-1286), Q54436(1237-1286), Q54436(1239-1286), Q54436(1237-1286)	1fe6	ABCD	0.0404	0.4394	0.0152	0	0.2828	0.2222	0	0.045	0.937	0	0.063	0.599	0.401	0.779	0.221	0.418	0.582	0.261	0.412	0.641	0.286	0.073	0.004	0.214	0.782	0.301	0.545	0.153	0.483	0.427	0.09	0.234	1	2	2	-0.238	0.847	1.8e-10
MF4140001	P03551(2-75), P03551(3-74), P03551(2-74), P03551(3-72)	3f6n	ABCD	0	0.3806	0.0277	0.0381	0.2664	0.2595	0.0277	0.045	0.82	0	0.18	0.589	0.411	0.791	0.209	0.412	0.588	0.281	0.362	0.672	0.281	0.047	0	0.285	0.715	0.287	0.561	0.151	0.508	0.42	0.073	0.279	1	2	2	-0.222	0.854	4.7e-11
MF5110001	P35444(28-72), P35444(28-72), P35444(28-72), P35444(28-72), P35444(28-72)	1fbm	ABCDE	0.0222	0.3778	0.0222	0.0222	0.3333	0.1778	0.0444	0	0.822	0	0.178	0.548	0.452	0.78	0.22	0.4	0.6	0.3	0.376	0.627	0.303	0.069	0.059	0.338	0.603	0.287	0.558	0.155	0.493	0.419	0.088	0.307	1	2	2	-0.157	0.835	3.6e-09
MF5110002	Q9R0G6(28-71), Q9R0G6(28-71), Q9R0G6(28-71), Q9R0G6(28-71), Q9R0G6(28-71)	1mz9	ABCDE	0.0227	0.3864	0	0.0227	0.2955	0.2273	0.0455	0	0.822	0	0.178	0.553	0.447	0.778	0.222	0.404	0.596	0.298	0.385	0.624	0.308	0.068	0.04	0.318	0.641	0.306	0.554	0.14	0.48	0.415	0.106	0.299	1	2	2	-0.167	0.841	1.1e-08
MF2110006	P54864(260-290), P54864(260-290)	1jun	AB	0	0.4194	0	0	0.2903	0.2903	0	0	0.941	0	0.059	0.573	0.427	0.806	0.194	0.37	0.63	0.146	0.404	0.714	0.245	0.041	0.007	0.381	0.612	0.264	0.589	0.147	0.495	0.444	0.062	0.131	1	2	2	-0.175	1	4.5e-06
MF2110007	P80220(15-45), P80220(15-45)	1dip	AB	0	0.3548	0	0	0.3871	0.2581	0	0	0.903	0	0.097	0.587	0.413	0.738	0.262	0.411	0.589	0.147	0.439	0.617	0.34	0.043	0	0.399	0.601	0.289	0.564	0.147	0.549	0.396	0.055	0.18	2	2	2	-0.133	0.927	4e-06
MF2110008	Q92172(271-304), Q92172(271-304)	4u5t	AB	0.0294	0.3824	0.0294	0	0.3529	0.1765	0.0294	0	0.892	0	0.108	0.608	0.392	0.742	0.258	0.384	0.616	0.153	0.363	0.624	0.285	0.091	0	0.285	0.715	0.301	0.558	0.141	0.518	0.394	0.087	0.152	2	2	2	-0.201	1	7.6e-05
MF2100004	O14492(21-83), O14492(21-82)	1q2h	AB	0.16	0.312	0.032	0.048	0.304	0.112	0.032	0.022	0.856	0	0.144	0.556	0.444	0.873	0.127	0.478	0.522	0.197	0.414	0.8	0.18	0.02	0.006	0.3	0.694	0.346	0.516	0.137	0.446	0.385	0.169	0.28	4	2	6	-0.529	0.679	6.3e-09
MF2202001	O00401(218-268), P0DJ89(221-241)	2lnh	AC	0.0556	0.3194	0.0694	0.0556	0.3056	0.1806	0.0139	0.42	0.562	0.055	0.384	0.463	0.537	0.835	0.165	0.598	0.402	0.129	0.5	0.68	0.275	0.045	0.077	0.419	0.505	0.463	0.428	0.109	0.338	0.404	0.259	0.196	4	5	5	-0.558	0.312	3.4e-06
MF2220001	O52124(2-85), Q47184(31-59|148-190)	1xou	AB	0.0492	0.3689	0.0287	0.0123	0.2541	0.2869	0	0.423	0.91	0	0.09	0.611	0.389	0.795	0.205	0.414	0.586	0.194	0.425	0.671	0.276	0.054	0.002	0.291	0.707	0.309	0.543	0.148	0.469	0.432	0.099	0.204	1	2	2	-0.291	0.684	6.1e-11
MF2120012	Q5KWF5(10-78), Q5KWF5(10-78)	2mmv	AB	0.087	0.3913	0.029	0.0435	0.3043	0.1449	0	0	0.604	0.167	0.229	0.565	0.435	0.818	0.182	0.533	0.467	0.147	0.523	0.685	0.275	0.04	0.014	0.269	0.717	0.38	0.49	0.129	0.376	0.425	0.199	0.153	4	4	4	-0.394	0.597	2.1e-08
MF2120013	Q8YFU1(1-118), Q8YFU1(1-118)	4q14	AB	0.0932	0.339	0.0932	0.0593	0.2627	0.1525	0	0	0.085	0.479	0.436	0.545	0.455	0.69	0.31	0.608	0.392	0.058	0.646	0.517	0.437	0.046	0.245	0.318	0.437	0.468	0.429	0.103	0.281	0.349	0.37	0.087	4	1	1	-0.26	0.164	5.3e-07
MF4120002	Q8Z7Q6(27-136), Q8Z7Q6(27-136), Q8Z7Q6(27-136), Q8Z7Q6(27-136)	2gpz	ABCD	0.1182	0.2455	0.0818	0.0636	0.2727	0.2182	0	0	0.064	0.482	0.455	0.588	0.412	0.608	0.392	0.59	0.41	0.093	0.658	0.51	0.425	0.065	0.149	0.418	0.434	0.475	0.429	0.097	0.289	0.325	0.386	0.144	4	1	1	-0.129	0.174	2.3e-07
MF4120003	O32142(2-114), O32142(2-114), O32142(2-114), O32142(2-114)	2h0e	ACDE	0.0973	0.3451	0.0885	0.0531	0.2389	0.1681	0.0088	0	0.081	0.423	0.495	0.528	0.472	0.611	0.389	0.632	0.368	0.109	0.603	0.496	0.426	0.079	0.157	0.412	0.43	0.464	0.435	0.101	0.297	0.332	0.371	0.167	4	1	1	-0.124	0.148	-
MF4120004	A6T926(1-107), A6T926(2-108), A6T926(1-108), A6T926(1-108)	3qva	ABCD	0.093	0.3326	0.1023	0.0465	0.186	0.2302	0.0093	0.023	0.067	0.52	0.413	0.618	0.382	0.656	0.344	0.576	0.424	0.092	0.651	0.492	0.412	0.096	0.246	0.341	0.413	0.458	0.441	0.101	0.297	0.346	0.357	0.123	3	1	1	-0.16	0.183	2.4e-11
MF4120005	P76341(26-137), P76341(26-137), P76341(27-137), P76341(27-137)	2g2n	ABCD	0.1166	0.2601	0.0628	0.0448	0.2601	0.2556	0	0.013	0.063	0.491	0.446	0.517	0.483	0.636	0.364	0.601	0.399	0.09	0.637	0.532	0.407	0.06	0.155	0.397	0.448	0.473	0.429	0.098	0.261	0.347	0.392	0.143	4	1	1	-0.17	0.152	1.9e-10
MF4110003	Q06S87(26-138), Q06S87(26-138), Q06S87(26-138), Q06S87(26-138)	2h1x	ABCD	0.1239	0.292	0.0796	0.0531	0.177	0.2566	0.0177	0	0.069	0.434	0.498	0.584	0.416	0.665	0.335	0.61	0.39	0.084	0.653	0.592	0.355	0.053	0.164	0.352	0.484	0.465	0.428	0.107	0.272	0.334	0.395	0.112	3	1	1	-0.196	0.322	4e-11
MF4110004	P03069(250-278), P03069(249-279), P03069(249-279), P03069(249-280)	2b1f	ABCD	0.0325	0.3577	0.0244	0	0.4553	0.1301	0	0.104	0.927	0	0.073	0.59	0.41	0.811	0.189	0.379	0.621	0.279	0.368	0.66	0.298	0.042	0.016	0.353	0.631	0.295	0.565	0.14	0.505	0.408	0.088	0.256	2	2	2	-0.221	0.907	1.3e-06
MF2120014	P03051(2-58), P03051(2-58)	2ijk	AB	0.0526	0.3158	0.0175	0	0.3684	0.2105	0.0351	0	0.896	0	0.104	0.506	0.494	0.811	0.189	0.5	0.5	0.135	0.527	0.706	0.249	0.045	0	0.344	0.656	0.379	0.493	0.129	0.406	0.388	0.206	0.143	2	4	4	-0.348	0.672	1.1e-09
MF4100002	P11274(2-66), P11274(2-67), P11274(2-67), P11274(2-67)	1k1f	ABCD	0.076	0.3042	0.0304	0.0608	0.3612	0.1521	0.0152	0.02	0.726	0.004	0.27	0.517	0.483	0.732	0.268	0.44	0.56	0.252	0.378	0.674	0.272	0.054	0.006	0.291	0.703	0.348	0.516	0.136	0.418	0.425	0.157	0.301	4	2	6	-0.152	0.923	4.3e-10
MF2120015	Q79A04(1-55), Q79A04(1-65)	3hry	AB	0.0667	0.3583	0.05	0.0167	0.3	0.2083	0	0.076	0.383	0.217	0.4	0.532	0.468	0.681	0.319	0.532	0.468	0.128	0.497	0.528	0.37	0.102	0.134	0.23	0.636	0.391	0.483	0.126	0.453	0.333	0.214	0.227	4	3	3	-0.361	0.531	1.1e-07
MF4120006	Q9HTW3(4-96), Q9HTW3(4-94), Q9HTW3(6-97), Q9HTW3(6-97)	1t3u	ABCD	0.0217	0.3533	0.0326	0.0109	0.3804	0.1793	0.0217	0.041	0.707	0.114	0.179	0.509	0.491	0.745	0.255	0.461	0.539	0.158	0.466	0.615	0.314	0.071	0.005	0.293	0.702	0.327	0.526	0.147	0.441	0.385	0.173	0.174	2	4	4	-0.15	0.717	1.7e-11
MF2120016	Q82T22(2-51), Q82T22(2-51)	2odk	AB	0.08	0.38	0.06	0.06	0.28	0.12	0.02	0	0.53	0.32	0.15	0.547	0.453	0.758	0.242	0.542	0.458	0.153	0.507	0.673	0.272	0.055	0.108	0.297	0.595	0.415	0.479	0.106	0.325	0.333	0.342	0.241	4	3	3	-0.429	0.752	1.5e-05
MF4140002	P03049(55-82), P03049(55-82), P03049(55-82), P03049(55-82)	1qey	ABCD	0.0714	0.3214	0	0	0.4643	0.1429	0	0	0.964	0	0.036	0.522	0.478	0.857	0.143	0.427	0.573	0.254	0.403	0.758	0.223	0.019	0.027	0.321	0.652	0.317	0.543	0.14	0.478	0.41	0.111	0.286	2	2	2	-0.299	0.824	2.7e-09
MF2100005	Q9UNL4(6-105), Q9UNL4(6-104)	4afl	AC	0.0804	0.3166	0.0201	0.0101	0.3719	0.191	0.0101	0.014	0.887	0	0.113	0.579	0.421	0.788	0.212	0.461	0.539	0.106	0.504	0.693	0.277	0.03	0	0.322	0.678	0.351	0.516	0.133	0.413	0.378	0.209	0.121	2	4	4	-0.232	0.549	2.2e-09
MF2201005	O75367(12-117), Q9D2U9(34-126)	1u35	CD	0.0603	0.3719	0.0704	0.0402	0.2714	0.1859	0	0.358	0.648	0.04	0.312	0.575	0.425	0.775	0.225	0.54	0.46	0.16	0.48	0.63	0.319	0.052	0.086	0.406	0.507	0.383	0.492	0.124	0.379	0.425	0.196	0.231	4	5	5	-0.545	0.428	2.8e-13
MF2201006	O75367(10-117), P02281(34-126)	2f8n	GH	0.0597	0.3781	0.0697	0.0398	0.2687	0.1841	0	0.294	0.637	0.04	0.323	0.579	0.421	0.772	0.228	0.543	0.457	0.155	0.48	0.641	0.306	0.053	0.088	0.389	0.523	0.386	0.49	0.124	0.386	0.416	0.198	0.227	4	5	5	-0.562	0.402	4.7e-13
MF2211001	P0C0S6(17-119), P02281(32-126)	1f66	CD	0.0505	0.3687	0.0657	0.0253	0.2828	0.2071	0	0.229	0.652	0.04	0.308	0.588	0.412	0.736	0.264	0.515	0.485	0.159	0.477	0.593	0.342	0.064	0.082	0.378	0.54	0.354	0.51	0.136	0.395	0.418	0.187	0.223	4	5	5	-0.477	0.455	7.9e-12
MF2200003	P0C0S5(16-121), P06899(33-125)	3wa9	CD	0.0503	0.3618	0.0754	0.0251	0.2814	0.206	0	0.249	0.633	0.04	0.327	0.598	0.402	0.733	0.267	0.507	0.493	0.162	0.484	0.604	0.333	0.062	0.074	0.411	0.515	0.366	0.504	0.13	0.377	0.427	0.196	0.224	4	5	5	-0.483	0.469	1e-12
MF2210001	P06897(5-119), P02281(28-126)	1aoi	CD	0.0514	0.3551	0.0794	0.0327	0.285	0.1963	0	0.311	0.617	0.037	0.346	0.546	0.454	0.777	0.223	0.519	0.481	0.147	0.449	0.632	0.315	0.054	0.099	0.415	0.485	0.371	0.499	0.13	0.384	0.415	0.2	0.221	4	5	5	-0.486	0.464	5.5e-13
MF2210002	P02263(14-119), P0C1H4(34-125)	2aro	AB	0.0556	0.3737	0.0707	0.0354	0.2677	0.197	0	0.29	0.652	0.04	0.308	0.567	0.433	0.753	0.247	0.524	0.476	0.161	0.483	0.609	0.33	0.061	0.087	0.403	0.511	0.381	0.493	0.125	0.373	0.408	0.219	0.238	4	5	5	-0.541	0.472	7.2e-12
MF2201007	P33778(33-126), Q8CGP4(15-119)	3x1u	CD	0.0553	0.3668	0.0704	0.0352	0.2563	0.2161	0	0.298	0.623	0.04	0.337	0.574	0.426	0.746	0.254	0.512	0.488	0.159	0.491	0.607	0.321	0.072	0.084	0.431	0.485	0.375	0.489	0.136	0.379	0.412	0.209	0.234	4	5	5	-0.515	0.49	1.8e-12
MF2210003	P02283(29-123), P84051(14-119)	2nqb	CD	0.0547	0.3831	0.0597	0.0348	0.2736	0.194	0	0.334	0.647	0.04	0.313	0.553	0.447	0.751	0.249	0.533	0.467	0.16	0.472	0.613	0.329	0.058	0.087	0.398	0.515	0.384	0.492	0.123	0.38	0.416	0.204	0.235	4	5	5	-0.559	0.458	-
MF2200004	Q71UI9(15-121), P06899(32-125)	3waa	CD	0.0498	0.3632	0.0746	0.0249	0.2836	0.204	0	0.246	0.642	0.04	0.318	0.595	0.405	0.732	0.268	0.506	0.494	0.161	0.478	0.609	0.328	0.063	0.082	0.379	0.539	0.365	0.498	0.137	0.392	0.414	0.194	0.219	4	5	5	-0.464	0.469	3.5e-12
MF2200005	P62805(26-103), P68431(39-135)	3afa	AB	0.0743	0.3486	0.0686	0.0286	0.3143	0.1543	0.0114	0.178	0.646	0.046	0.309	0.57	0.43	0.764	0.236	0.493	0.507	0.169	0.497	0.64	0.31	0.05	0.065	0.392	0.543	0.367	0.506	0.127	0.363	0.387	0.25	0.234	4	5	5	-0.529	0.435	5.4e-12
MF2200006	P62805(26-103), Q71DI3(40-135)	3av1	AB	0.0747	0.3506	0.069	0.023	0.3161	0.1609	0.0057	0.176	0.649	0.046	0.305	0.561	0.439	0.761	0.239	0.493	0.507	0.169	0.495	0.641	0.31	0.049	0.065	0.388	0.547	0.366	0.506	0.128	0.367	0.391	0.242	0.232	4	5	5	-0.479	0.438	4.9e-12
MF2200007	P62805(23-103), Q16695(39-135)	3a6n	AB	0.073	0.3427	0.0674	0.0281	0.3202	0.1573	0.0112	0.175	0.624	0.045	0.331	0.569	0.431	0.752	0.248	0.495	0.505	0.166	0.495	0.644	0.308	0.049	0.065	0.405	0.53	0.37	0.502	0.129	0.36	0.387	0.254	0.23	4	5	5	-0.454	0.445	6.4e-12
MF2200008	P62805(26-103), P84243(39-135)	3av2	AB	0.0743	0.3486	0.0743	0.0286	0.3143	0.1543	0.0057	0.158	0.629	0.046	0.326	0.571	0.429	0.767	0.233	0.487	0.513	0.167	0.494	0.642	0.305	0.053	0.067	0.419	0.515	0.361	0.51	0.129	0.361	0.384	0.255	0.234	4	5	5	-0.471	0.42	9e-12
MF2210004	P84040(23-103), P02299(39-136)	2nqb	AB	0.0726	0.352	0.067	0.0279	0.3184	0.1564	0.0056	0.166	0.637	0.045	0.318	0.556	0.444	0.751	0.249	0.502	0.498	0.165	0.488	0.641	0.308	0.051	0.06	0.39	0.55	0.37	0.504	0.126	0.359	0.39	0.25	0.229	4	5	5	-0.469	0.461	2.9e-12
MF2210005	P02309(25-103), P61830(39-135)	1id3	AB	0.0739	0.3352	0.0625	0.0227	0.3295	0.1761	0	0.152	0.631	0.045	0.324	0.56	0.44	0.758	0.242	0.492	0.509	0.164	0.489	0.634	0.306	0.06	0.071	0.389	0.541	0.368	0.501	0.13	0.359	0.378	0.263	0.231	4	5	5	-0.54	0.506	2.7e-11
MF4110005	P27731(33-146), P27731(33-146), P27731(33-146), P27731(33-146)	1tfp	ABCD	0.1316	0.307	0.0702	0.0351	0.2368	0.2105	0.0088	0	0.013	0.487	0.5	0.583	0.417	0.634	0.366	0.606	0.394	0.091	0.629	0.491	0.421	0.088	0.288	0.329	0.382	0.471	0.427	0.103	0.28	0.334	0.386	0.142	4	1	1	-0.167	0.28	2.8e-08
MF2202002	P42768(250-308), P0DJ89(224-238)	2k42	AB	0.0676	0.3243	0.0811	0.027	0.2838	0.2162	0	0.357	0.584	0.052	0.364	0.501	0.499	0.674	0.326	0.551	0.449	0.127	0.585	0.677	0.278	0.045	0.026	0.395	0.579	0.437	0.449	0.114	0.342	0.408	0.251	0.182	4	5	5	-0.621	0.309	8.6e-08
MF2110009	O24646(111-150), O24646(111-150)	2oqq	AB	0.025	0.3	0	0	0.375	0.3	0	0	0.94	0	0.06	0.53	0.47	0.745	0.255	0.406	0.594	0.156	0.412	0.635	0.302	0.063	0	0.278	0.722	0.319	0.534	0.146	0.443	0.443	0.113	0.19	2	2	2	-0.284	0.994	2.4e-08
MF2211002	P28574(74-102), A1YG22(406-434)	1a93	AB	0	0.3103	0	0	0.4655	0.2241	0	0.207	0.875	0	0.125	0.505	0.495	0.769	0.231	0.374	0.626	0.144	0.316	0.63	0.32	0.05	0	0.271	0.729	0.311	0.547	0.142	0.524	0.428	0.047	0.177	2	2	2	-0.085	1	4.7e-06
MF2201008	P28033(239-285), P18848(286-341)	1ci6	AB	0.0291	0.2913	0.0097	0	0.4369	0.2233	0.0097	0.22	0.932	0	0.068	0.591	0.409	0.765	0.235	0.364	0.637	0.12	0.408	0.661	0.292	0.047	0	0.332	0.668	0.293	0.558	0.149	0.496	0.415	0.088	0.154	2	2	2	-0.201	0.948	1.5e-06
MF4110006	P16649(2-81), P16649(2-79), P16649(4-80), P16649(4-78)	3vp8	ABCD	0.0774	0.2839	0	0	0.3226	0.3161	0	0.026	0.958	0	0.042	0.546	0.454	0.735	0.265	0.383	0.617	0.23	0.405	0.635	0.302	0.064	0	0.193	0.807	0.296	0.554	0.15	0.485	0.407	0.108	0.238	2	2	2	-0.117	0.923	1.4e-13
MF2120017	C4Z2H9(2-98), C4Z2H9(2-98)	3g1c	AB	0.0928	0.3196	0.0412	0	0.3093	0.2268	0.0103	0	0.742	0	0.258	0.506	0.494	0.706	0.294	0.541	0.459	0.168	0.497	0.601	0.327	0.072	0.008	0.362	0.63	0.402	0.479	0.119	0.349	0.39	0.261	0.196	3	5	6	-0.448	0.488	-
MF2120018	A0A0H3JS52(2-99), A0A0H3JS52(2-99)	3kor	AD	0.0816	0.3265	0.0408	0	0.2551	0.2755	0.0204	0	0.76	0	0.24	0.499	0.501	0.674	0.326	0.526	0.474	0.174	0.49	0.538	0.359	0.103	0	0.378	0.622	0.393	0.479	0.128	0.362	0.388	0.25	0.252	3	5	6	-0.447	0.562	5.7e-14
MF3300001	Q14186(199-346), P06400(829-872), Q01094(201-301)	2aze	ABC	0.0478	0.3038	0.041	0.0512	0.2628	0.2662	0.0273	0.237	0.476	0.187	0.337	0.569	0.431	0.689	0.311	0.505	0.495	0.187	0.459	0.551	0.371	0.078	0.15	0.346	0.504	0.38	0.487	0.133	0.377	0.376	0.248	0.279	3	3	3	-0.473	0.556	3.1e-19
MF2100006	Q7L804(450-489), Q7L804(450-489)	2k6s	AB	0.05	0.375	0	0	0.45	0.125	0	0	0.805	0	0.195	0.625	0.375	0.859	0.141	0.4	0.6	0.063	0.362	0.775	0.217	0.008	0	0.392	0.608	0.313	0.533	0.154	0.417	0.459	0.124	0.104	2	2	2	-0.133	0.882	0.00026
MF4100003	P04637(327-354), P04637(327-354), P04637(327-354), P04637(327-354)	2j0z	ABCD	0.1429	0.2857	0.0357	0	0.3929	0.1429	0	0	0.705	0.179	0.116	0.437	0.563	0.739	0.261	0.478	0.522	0.291	0.323	0.63	0.318	0.052	0.095	0.293	0.612	0.354	0.51	0.136	0.438	0.415	0.147	0.396	2	3	3	-0.2	0.917	4.9e-08
MF4110007	G1K2L5(303-343), G1K2L5(302-340), G1K2L5(302-342), G1K2L5(302-341)	4d1l	CDEF	0.0807	0.2981	0.0248	0.0248	0.4037	0.1677	0	0.087	0.639	0.177	0.184	0.529	0.471	0.662	0.338	0.447	0.553	0.298	0.337	0.536	0.388	0.076	0.096	0.318	0.585	0.332	0.528	0.139	0.435	0.413	0.152	0.409	2	3	3	-0.28	0.882	5.8e-10
MF4100004	Q9H3D4(398-437), Q9H3D4(398-437), Q9H3D4(398-437), Q9H3D4(398-437)	3zy1	ABCD	0.1	0.325	0.025	0.05	0.325	0.175	0	0	0.675	0.175	0.15	0.602	0.398	0.744	0.256	0.44	0.56	0.274	0.394	0.635	0.3	0.065	0.133	0.274	0.593	0.361	0.506	0.133	0.404	0.386	0.211	0.374	4	2	6	-0.23	0.798	-
MF4100005	O15350(352-386), O15350(352-386), O15350(352-386), O15350(352-386)	2kby	ABCD	0.0857	0.3714	0.0286	0.0571	0.3143	0.1429	0	0	0.636	0.159	0.205	0.482	0.518	0.718	0.282	0.487	0.513	0.302	0.381	0.63	0.305	0.065	0.118	0.319	0.564	0.353	0.523	0.125	0.435	0.386	0.179	0.5	4	3	3	-0.253	0.839	2.9e-14
MF2140005	P03120(286-365), P03120(286-365)	1r8p	AB	0.1125	0.2625	0.0375	0.025	0.25	0.2875	0.025	0	0.284	0.247	0.469	0.598	0.402	0.704	0.296	0.6	0.4	0.062	0.552	0.517	0.38	0.102	0.263	0.361	0.376	0.455	0.438	0.108	0.258	0.437	0.304	0.098	3	1	1	-0.201	0.038	2.8e-09
MF2140006	P06790(284-365), P06790(285-365)	1f9f	AB	0.0859	0.2577	0.0675	0.0245	0.2699	0.2822	0.0123	0.023	0.314	0.379	0.307	0.569	0.431	0.716	0.284	0.581	0.419	0.061	0.624	0.511	0.406	0.083	0.162	0.424	0.415	0.436	0.449	0.115	0.288	0.383	0.329	0.086	3	1	1	-0.297	0.159	8.2e-11
MF2140007	P17383(291-372), P17383(291-372)	1dhm	AB	0.0976	0.2805	0.0366	0.0244	0.2195	0.3171	0.0244	0	0.277	0.241	0.482	0.555	0.445	0.681	0.319	0.613	0.387	0.058	0.583	0.524	0.407	0.069	0.226	0.331	0.444	0.483	0.421	0.096	0.297	0.396	0.306	0.101	3	1	1	-0.258	0.122	1e-10
MF2140008	Q84294(283-368), Q84294(282-368)	2aye	AB	0.104	0.2775	0.0231	0.0578	0.2775	0.237	0.0231	0.018	0.347	0.312	0.341	0.572	0.428	0.641	0.364	0.611	0.388	0.089	0.593	0.502	0.416	0.081	0.098	0.463	0.44	0.472	0.433	0.095	0.264	0.376	0.36	0.139	3	1	1	-0.353	0.192	1.8e-13
MF2140009	P03122(311-410), P03122(311-410)	1dbd	AB	0.11	0.23	0.09	0.04	0.23	0.27	0.03	0	0.26	0.26	0.48	0.574	0.426	0.653	0.347	0.548	0.452	0.109	0.5	0.47	0.42	0.11	0.098	0.399	0.504	0.43	0.451	0.119	0.32	0.391	0.289	0.174	3	1	1	-0.213	0.307	6.3e-14
MF6100001	O75506(9-53), O75506(6-49), O75506(9-53), O75506(6-49), O75506(9-53), O75506(6-49)	3ci9	ABCDEF	0.0225	0.3371	0.0225	0.0112	0.2697	0.3371	0	0.075	0.91	0	0.09	0.515	0.485	0.784	0.216	0.396	0.604	0.276	0.375	0.634	0.304	0.061	0	0.309	0.691	0.303	0.552	0.145	0.472	0.457	0.071	0.258	1	2	2	-0.145	0.824	0.0001
MF6120001	Q01468(2-58), Q01468(2-58), Q01468(2-58), Q01468(2-57), Q01468(2-58), Q01468(2-58)	4x19	ABCDEF	0.0176	0.3842	0.088	0.0352	0.2991	0.176	0	0.022	0.44	0.331	0.229	0.551	0.449	0.651	0.349	0.549	0.451	0.229	0.51	0.5	0.393	0.107	0.221	0.321	0.458	0.394	0.478	0.128	0.368	0.358	0.274	0.297	4	3	3	-0.109	0.544	4e-10
MF2120019	P0A8U6(2-105), P0A8U6(2-105)	1cmb	AB	0.0673	0.2885	0.0385	0.0577	0.3558	0.1827	0.0096	0	0.399	0.125	0.476	0.551	0.449	0.808	0.192	0.526	0.474	0.106	0.56	0.602	0.346	0.051	0.162	0.359	0.48	0.426	0.459	0.115	0.244	0.393	0.363	0.134	4	1	1	-0.228	0.801	1.2e-10
MF2110010	P01139(131-237), P01139(131-237)	1bet	AB	0.1028	0.2617	0.0467	0.0093	0.2617	0.2617	0.0561	0	0	0.636	0.364	0.559	0.441	0.726	0.274	0.567	0.434	0.081	0.575	0.61	0.298	0.092	0.194	0.235	0.571	0.451	0.442	0.106	0.278	0.382	0.34	0.104	3	1	1	-0.386	0.257	-
MF2100007	P20783(149-250), P20783(149-250)	1b8k	AB	0.0882	0.2353	0.0588	0.0196	0.2745	0.2647	0.0588	0	0	0.578	0.422	0.526	0.474	0.684	0.316	0.566	0.434	0.086	0.55	0.597	0.346	0.057	0.119	0.395	0.486	0.479	0.416	0.105	0.293	0.336	0.371	0.141	3	1	1	-0.415	0.277	-
MF2100008	P34130(91-206), P34130(93-207)	1b98	AM	0.0693	0.2944	0.1342	0.026	0.29	0.1342	0.0519	0.027	0	0.519	0.481	0.543	0.457	0.7	0.3	0.536	0.464	0.084	0.568	0.58	0.347	0.073	0.122	0.37	0.508	0.459	0.435	0.106	0.3	0.366	0.334	0.14	3	1	1	-0.336	0.243	9.8e-07
MF2200009	P20783(146-253), P23560(136-244)	1bnd	AB	0.0829	0.235	0.0691	0.0184	0.2857	0.2535	0.0553	0.068	0.032	0.599	0.369	0.536	0.464	0.651	0.349	0.565	0.435	0.087	0.56	0.572	0.362	0.067	0.162	0.323	0.515	0.46	0.441	0.099	0.27	0.374	0.356	0.12	3	1	1	-0.648	0.148	7.2e-09
MF2201009	P34130(92-210), P14082(141-249)	1b8m	AB	0.0746	0.2719	0.1096	0.0219	0.2807	0.1886	0.0526	0.266	0.018	0.567	0.415	0.56	0.44	0.671	0.329	0.554	0.446	0.081	0.546	0.585	0.338	0.076	0.155	0.284	0.561	0.445	0.446	0.109	0.279	0.381	0.339	0.109	3	1	1	-0.598	0.112	3.4e-07
MF2110011	Q5ISB0(130-237), Q5ISB0(131-238)	4efv	AB	0.1019	0.2593	0.0648	0.0185	0.2639	0.2361	0.0556	0.019	0.014	0.616	0.37	0.566	0.434	0.69	0.31	0.595	0.405	0.089	0.554	0.567	0.356	0.078	0.192	0.339	0.469	0.47	0.432	0.098	0.279	0.371	0.35	0.123	3	1	1	-0.375	0.235	1e-09
MF2110012	P22361(2-32), P22361(2-32)	1jb6	AC	0	0.4839	0.0645	0	0.1935	0.2581	0	0	0.719	0	0.281	0.628	0.372	0.834	0.166	0.417	0.583	0.162	0.344	0.739	0.227	0.034	0	0.352	0.648	0.312	0.539	0.148	0.503	0.41	0.087	0.217	1	2	2	-0.372	0.669	-
MF2120020	P0A6R3(6-98), P0A6R3(22-98)	1ety	AB	0.0588	0.3588	0.0588	0.0235	0.2353	0.2647	0	0.113	0.684	0.026	0.289	0.524	0.476	0.775	0.225	0.561	0.439	0.165	0.505	0.648	0.285	0.066	0.17	0.29	0.539	0.395	0.481	0.124	0.367	0.366	0.267	0.222	4	3	3	-0.331	0.64	1.9e-10
MF4410001	P60881(141-204), P60881(7-83), P63045(28-89), P32851(191-256)	1n7s	ABCD	0.0223	0.3457	0.0372	0	0.3866	0.2082	0	0.337	0.938	0	0.062	0.501	0.499	0.76	0.24	0.39	0.61	0.266	0.406	0.631	0.305	0.064	0.004	0.346	0.649	0.306	0.551	0.142	0.484	0.418	0.098	0.275	2	2	2	-0.295	1	2.4e-13
MF4400001	O95721(194-258), Q9BV40(11-74), O95721(39-116), P56962(170-227)	4wy4	ABCD	0.0415	0.3283	0.034	0	0.3509	0.2453	0	0.364	0.939	0	0.061	0.571	0.429	0.768	0.232	0.365	0.635	0.26	0.401	0.602	0.332	0.067	0.002	0.332	0.666	0.313	0.547	0.14	0.469	0.424	0.108	0.282	2	2	2	-0.33	1	1.7e-12
MF4411001	G3V7P1(184-248), Q9JI51(122-197), Q5R6Q2(170-232), O70480(49-111)	2nps	ABCD	0.03	0.3221	0.0375	0	0.3633	0.2472	0	0.305	0.894	0	0.106	0.531	0.469	0.746	0.254	0.365	0.635	0.266	0.401	0.597	0.336	0.067	0.006	0.359	0.635	0.307	0.547	0.146	0.489	0.429	0.082	0.289	2	2	2	-0.282	1	7.2e-14
MF4411002	O70439(169-228), Q9WUF4(11-64), Q9Z2Q7(152-206), O88384(139-198)	1gl2	ABCD	0.0087	0.3188	0.0393	0	0.3537	0.2795	0	0.293	0.96	0	0.04	0.514	0.486	0.766	0.234	0.341	0.659	0.277	0.407	0.596	0.33	0.074	0.002	0.336	0.662	0.298	0.552	0.15	0.496	0.43	0.074	0.27	2	2	2	-0.25	1	1.8e-12
MF4411003	Q9WU70(1087-1144), P60881(141-200), P60881(16-83), P32851(196-259)	1urq	ABCD	0.024	0.348	0.056	0	0.38	0.192	0	0.458	0.948	0	0.052	0.601	0.399	0.773	0.227	0.325	0.675	0.276	0.417	0.619	0.322	0.059	0.004	0.354	0.642	0.296	0.551	0.152	0.498	0.415	0.087	0.303	2	2	2	-0.285	0.967	1.8e-11
MF4410002	P32867(189-257), P40357(433-499), P40357(596-650), P31109(27-86)	3b5n	ABCD	0.0159	0.3546	0.0478	0	0.3267	0.255	0	0.377	0.962	0	0.038	0.547	0.453	0.737	0.263	0.376	0.624	0.288	0.393	0.585	0.337	0.078	0.003	0.358	0.64	0.299	0.55	0.151	0.51	0.41	0.08	0.297	1	2	2	-0.184	1	3.7e-14
MF4210003	P32851(191-257), P60881(10-78), P32851(195-245), P60881(11-72)	1jth	ABCD	0.0281	0.3614	0.0321	0	0.4096	0.1687	0	0.255	0.968	0	0.032	0.557	0.443	0.779	0.221	0.37	0.63	0.253	0.407	0.644	0.299	0.056	0.001	0.356	0.643	0.306	0.55	0.144	0.485	0.434	0.081	0.259	2	2	2	-0.201	1	3.3e-12
MF2200010	P62805(25-93), P49450(60-134)	3nqj	AB	0.0833	0.4028	0.0556	0.0208	0.2986	0.1319	0.0069	0.248	0.703	0.041	0.255	0.612	0.388	0.796	0.204	0.502	0.498	0.16	0.498	0.673	0.29	0.037	0.089	0.363	0.548	0.378	0.497	0.126	0.365	0.387	0.248	0.201	4	5	5	-0.641	0.453	8.1e-08
MF2210006	Q6CMU6(30-95), Q6CTI2(105-183)	2yfw	AB	0.0621	0.3931	0.0414	0.0207	0.3034	0.1793	0	0.18	0.701	0.056	0.243	0.581	0.419	0.807	0.193	0.495	0.505	0.166	0.489	0.692	0.268	0.039	0.067	0.357	0.576	0.356	0.518	0.126	0.397	0.365	0.238	0.201	4	5	5	-0.578	0.44	6.1e-10
MF2200011	A8MT69(8-81), Q8N2Z9(14-105)	4ne3	AB	0.0663	0.3735	0.0241	0.006	0.3253	0.1867	0.0181	0.344	0.743	0.036	0.222	0.551	0.449	0.798	0.202	0.506	0.494	0.163	0.5	0.65	0.298	0.052	0.067	0.333	0.6	0.395	0.485	0.12	0.358	0.413	0.23	0.196	2	5	6	-0.623	0.407	6.6e-11
MF2210007	P0DJH7(6-80), E1BSW7(5-102)	3b0b	AD	0.0578	0.3699	0.0462	0.0058	0.3353	0.1676	0.0173	0.386	0.763	0.046	0.191	0.546	0.454	0.768	0.232	0.486	0.514	0.169	0.492	0.636	0.304	0.06	0.08	0.346	0.574	0.391	0.481	0.128	0.379	0.401	0.219	0.188	2	5	6	-0.558	0.436	1.4e-11
MF2210008	Q3E829(2-77), Q3E835(2-89)	3v9r	AB	0.0488	0.3598	0.0549	0.0244	0.3232	0.189	0	0.151	0.688	0.025	0.287	0.542	0.458	0.721	0.279	0.507	0.493	0.169	0.471	0.598	0.34	0.062	0.092	0.307	0.601	0.369	0.498	0.133	0.361	0.394	0.245	0.22	4	5	5	-0.589	0.448	1.3e-09
MF2210009	F1NPG5(538-628), P0DJH6(4-76)	3b0c	TW	0.061	0.3659	0.0244	0.0427	0.3415	0.1585	0.0061	0.128	0.713	0.049	0.238	0.601	0.399	0.779	0.221	0.529	0.471	0.168	0.493	0.638	0.312	0.051	0.063	0.376	0.56	0.382	0.496	0.122	0.374	0.392	0.234	0.219	4	5	5	-0.522	0.524	5.1e-13
MF4110008	Q9N6D8(320-384), Q9N6D8(320-384), Q9N6D8(320-384), Q9N6D8(320-384)	2rp4	ABCD	0.0615	0.3231	0.0308	0.0462	0.3231	0.2	0.0154	0	0.615	0.173	0.212	0.422	0.578	0.735	0.265	0.558	0.442	0.216	0.496	0.621	0.322	0.057	0.112	0.328	0.56	0.426	0.466	0.108	0.375	0.403	0.222	0.253	4	3	3	-0.198	0.722	2.6e-13
MF2210010	Q38789(177-285), Q38783(29-137)	1kj1	AD	0.1055	0.2982	0.0917	0.0183	0.2294	0.2385	0.0183	0.055	0	0.459	0.541	0.517	0.483	0.689	0.311	0.585	0.415	0.094	0.607	0.526	0.378	0.096	0.209	0.331	0.46	0.452	0.444	0.104	0.287	0.42	0.294	0.173	3	1	1	-0.41	0.088	8e-15
MF2110013	K4DIE9(1-105), K4DIE9(1-105)	4h3o	AB	0.1048	0.2667	0.1048	0.0095	0.1905	0.3048	0.019	0	0	0.467	0.533	0.481	0.519	0.703	0.297	0.585	0.415	0.076	0.628	0.599	0.325	0.076	0.174	0.294	0.532	0.452	0.445	0.103	0.274	0.416	0.31	0.134	3	1	1	-0.381	0.189	9.2e-14
MF2110014	P30617(24-130), P30617(24-130)	3dzw	AC	0.1215	0.2617	0.1028	0.028	0.1589	0.2991	0.028	0	0	0.468	0.532	0.493	0.507	0.63	0.37	0.601	0.399	0.102	0.587	0.501	0.39	0.109	0.174	0.348	0.478	0.456	0.443	0.101	0.272	0.418	0.31	0.192	3	1	1	-0.342	0.229	-
MF2110015	Q8L568(29-138), Q8L568(29-138)	3a0e	AB	0.0909	0.2818	0.1182	0.0545	0.1545	0.2818	0.0182	0	0	0.436	0.564	0.562	0.438	0.643	0.357	0.582	0.418	0.097	0.608	0.483	0.415	0.101	0.228	0.372	0.4	0.458	0.439	0.102	0.261	0.429	0.31	0.172	3	1	1	-0.367	0.201	-
MF2210011	R9RL27(24-132), R9RL27(140-249)	5d5g	AB	0.105	0.2648	0.1187	0.032	0.2283	0.2329	0.0183	0.067	0	0.434	0.566	0.512	0.488	0.726	0.274	0.596	0.404	0.097	0.599	0.557	0.376	0.067	0.161	0.392	0.447	0.463	0.439	0.098	0.279	0.449	0.272	0.164	3	1	1	-0.607	0.083	3e-11
MF2210012	P19667(23-133), Q6F495(23-133)	2d04	AB	0.0946	0.2793	0.1216	0.018	0.1667	0.2838	0.036	0.126	0	0.428	0.572	0.494	0.506	0.74	0.26	0.584	0.416	0.073	0.624	0.614	0.333	0.054	0.158	0.346	0.496	0.449	0.451	0.101	0.277	0.449	0.274	0.118	3	1	1	-0.43	0.289	6.8e-11
MF2210013	P86626(112-224), P86626(1-111)	3mez	AB	0.0804	0.317	0.0893	0.0312	0.1786	0.2857	0.0179	0.107	0	0.411	0.589	0.482	0.518	0.723	0.277	0.592	0.408	0.086	0.598	0.567	0.36	0.074	0.161	0.322	0.517	0.458	0.444	0.098	0.261	0.431	0.307	0.152	3	1	1	-0.605	0.125	7e-12
MF2100009	P61244(40-95), P61244(40-95)	1r05	AB	0.0536	0.2679	0.0179	0.0179	0.375	0.2679	0	0	0.869	0	0.131	0.492	0.508	0.853	0.147	0.477	0.524	0.131	0.491	0.726	0.256	0.018	0.006	0.354	0.64	0.4	0.475	0.125	0.394	0.432	0.174	0.201	2	5	6	-0.317	0.812	5.1e-09
MF2100010	Q14469(43-95), Q14469(43-95)	2mh3	AB	0	0.3396	0	0	0.434	0.2264	0	0	0.787	0	0.213	0.495	0.505	0.745	0.255	0.516	0.484	0.116	0.538	0.629	0.32	0.051	0.022	0.32	0.658	0.386	0.497	0.117	0.367	0.422	0.212	0.128	2	4	4	-0.273	0.621	2.6e-09
MF2100011	Q02535(53-83), Q02535(53-83)	2lfh	AB	0.0323	0.4516	0.0645	0.0645	0.1935	0.1935	0	0	0.655	0.012	0.333	0.523	0.477	0.7	0.3	0.542	0.458	0.209	0.478	0.739	0.237	0.024	0	0.175	0.825	0.401	0.475	0.123	0.313	0.444	0.242	0.154	4	4	4	-0.585	0.584	1.8e-12
MF2120021	O52124(4-88), O52124(4-88)	2lhk	AB	0.0471	0.3294	0.0235	0.0235	0.3882	0.1882	0	0	0.624	0	0.376	0.665	0.335	0.764	0.236	0.421	0.579	0.102	0.454	0.74	0.23	0.029	0	0.088	0.912	0.334	0.517	0.149	0.388	0.446	0.166	0.085	2	2	2	-0.225	0.443	1.4e-08
MF2120022	Q57471(10-98), Q57471(10-98)	1rfy	AC	0.0562	0.3483	0.0674	0.0674	0.2697	0.1798	0.0112	0	0.719	0	0.281	0.603	0.397	0.831	0.169	0.564	0.436	0.074	0.579	0.729	0.262	0.009	0	0.419	0.581	0.426	0.467	0.107	0.337	0.415	0.247	0.072	4	4	4	-0.262	0.453	-
MF2120023	Q20HX4(12-100), Q20HX4(12-100)	2hjd	AB	0.0449	0.427	0.0787	0.0337	0.236	0.1798	0	0	0.725	0	0.275	0.596	0.404	0.831	0.169	0.573	0.427	0.073	0.58	0.749	0.236	0.015	0	0.307	0.693	0.414	0.473	0.113	0.346	0.423	0.231	0.066	4	4	4	-0.286	0.499	3.7e-06
MF2140010	Q06253(1-56), Q06253(1-56)	3hs2	AB	0.0714	0.3571	0.0536	0.0179	0.3036	0.1964	0	0	0.536	0.268	0.196	0.597	0.403	0.736	0.264	0.463	0.537	0.155	0.511	0.572	0.336	0.092	0.145	0.237	0.618	0.376	0.493	0.131	0.43	0.363	0.207	0.229	4	3	3	-0.41	0.575	8.8e-08
MF2120024	O33347(1-56), O33347(1-56)	3g5o	AD	0.0714	0.3929	0.0536	0.0357	0.1964	0.25	0	0	0.474	0.333	0.193	0.587	0.413	0.773	0.227	0.574	0.426	0.136	0.495	0.649	0.29	0.061	0.185	0.24	0.575	0.376	0.501	0.123	0.423	0.373	0.204	0.208	4	3	3	-0.485	0.665	3.2e-07
MF2120025	Q03132(3496-3536), Q03132(3496-3536)	1pzq	AB	0.0244	0.3171	0.0732	0	0.4634	0.122	0	0	0.767	0	0.233	0.413	0.587	0.774	0.226	0.455	0.545	0.218	0.444	0.717	0.246	0.037	0.011	0.421	0.568	0.371	0.509	0.121	0.407	0.424	0.169	0.34	2	5	6	-0.546	0.796	1.2e-08
MF2100012	P08263(2-222), P08263(2-222)	1k3y	AB	0.095	0.3529	0.0452	0.0543	0.3213	0.1267	0.0045	0	0.59	0.077	0.333	0.585	0.415	0.696	0.304	0.606	0.394	0.039	0.678	0.654	0.266	0.08	0.004	0.384	0.612	0.462	0.437	0.101	0.266	0.395	0.339	0.051	4	1	1	-0.381	0.092	7.5e-07
MF2130001	P19267(3-67), P19267(3-67)	1bfm	AB	0.0154	0.4462	0.0615	0.0308	0.3846	0.0615	0	0	0.785	0.046	0.169	0.503	0.497	0.857	0.143	0.545	0.455	0.137	0.502	0.695	0.282	0.023	0.134	0.463	0.403	0.426	0.47	0.104	0.406	0.426	0.168	0.196	4	5	5	-0.418	0.555	1.8e-07
MF2100013	P04271(2-88), P04271(2-88)	1uwo	AB	0.0805	0.3103	0.046	0	0.3908	0.1494	0.023	0	0.609	0.023	0.368	0.508	0.492	0.844	0.156	0.572	0.428	0.085	0.598	0.707	0.263	0.029	0.074	0.348	0.577	0.481	0.411	0.108	0.314	0.393	0.293	0.112	2	4	4	-0.403	0.256	7.8e-08
MF2110016	Q94524(8-111), Q94524(8-111)	1ygt	AB	0.0962	0.2981	0.0673	0.0096	0.2019	0.2885	0.0385	0	0.327	0.365	0.308	0.518	0.482	0.659	0.341	0.619	0.381	0.096	0.548	0.525	0.391	0.085	0.209	0.355	0.435	0.455	0.439	0.106	0.313	0.381	0.305	0.201	3	1	1	-0.368	0.267	-
MF2120026	Q60034(2-165), Q60034(2-169)	1cz3	AB	0.1265	0.3012	0.0783	0.0482	0.2861	0.1596	0	0.027	0.238	0.361	0.401	0.54	0.46	0.706	0.294	0.622	0.378	0.055	0.645	0.517	0.405	0.078	0.242	0.376	0.383	0.481	0.425	0.094	0.273	0.365	0.362	0.083	4	1	1	-0.44	0.232	8e-08
MF4120007	P00383(21-78), P00383(21-78), P00383(21-78), P00383(21-78)	2rh2	ABCD	0.1034	0.3103	0.1207	0.0517	0.1897	0.2069	0.0172	0	0.053	0.456	0.491	0.54	0.46	0.716	0.284	0.571	0.429	0.114	0.576	0.515	0.396	0.088	0.209	0.353	0.438	0.454	0.453	0.093	0.259	0.405	0.336	0.174	3	1	1	-0.117	0.292	-
MF2110017	P80031(1-206), P80031(1-206)	2gsr	AB	0.1019	0.3155	0.0583	0.068	0.2476	0.1893	0.0194	0	0.604	0.082	0.314	0.614	0.386	0.671	0.329	0.581	0.419	0.04	0.693	0.553	0.36	0.087	0.006	0.388	0.606	0.438	0.451	0.11	0.271	0.386	0.343	0.045	4	1	1	-0.3	0.104	1.9e-08
MF2110018	P08515(2-217), P08515(2-217)	4wr4	AB	0.125	0.3102	0.0648	0.0602	0.3148	0.1065	0.0185	0	0.488	0.083	0.429	0.581	0.419	0.649	0.351	0.623	0.377	0.041	0.649	0.601	0.294	0.104	0.012	0.393	0.595	0.486	0.417	0.097	0.253	0.399	0.348	0.043	4	1	1	-0.257	0.056	-
MF2210014	P02882(1-48), P02881(2-45)	1krl	AB	0.1413	0.2391	0.087	0.0652	0.3152	0.1413	0.0109	0.265	0.185	0.478	0.337	0.57	0.43	0.697	0.303	0.549	0.451	0.174	0.46	0.566	0.361	0.073	0.185	0.329	0.486	0.44	0.451	0.109	0.313	0.368	0.319	0.323	4	3	3	-0.465	0.571	1.8e-08
MF2120027	P62552(1-72), P62552(1-72)	2adl	AB	0.0833	0.3194	0.0417	0	0.3056	0.25	0	0	0.271	0.069	0.66	0.539	0.461	0.729	0.271	0.472	0.528	0.127	0.294	0.616	0.309	0.075	0.148	0.348	0.505	0.456	0.441	0.103	0.334	0.455	0.211	0.372	3	5	6	-0.165	0.743	4.3e-10
MF6110001	P22887(6-155), P22887(6-155), P22887(6-155), P22887(6-155), P22887(6-155), P22887(6-155)	1npk	ABCDEF	0.08	0.3533	0.1067	0.06	0.26	0.14	0	0	0.433	0.173	0.393	0.614	0.386	0.644	0.356	0.594	0.406	0.091	0.645	0.517	0.407	0.075	0.131	0.527	0.342	0.46	0.438	0.102	0.264	0.415	0.32	0.12	4	1	1	-0.078	0.115	-
MF2100014	P00441(2-154), P00441(2-154)	2c9v	AF	0.0327	0.2745	0.1634	0.0327	0.2876	0.183	0.0261	0	0.069	0.408	0.523	0.548	0.452	0.732	0.268	0.572	0.428	0.031	0.655	0.567	0.395	0.037	0.27	0.4	0.33	0.423	0.465	0.113	0.291	0.417	0.292	0.039	3	1	1	-0.193	0.074	1.1e-06
MF2120028	P01006(37-144), P01006(37-144)	3ssi	AB	0.0648	0.3796	0.1019	0.0648	0.1667	0.1852	0.037	0	0.157	0.324	0.519	0.637	0.363	0.683	0.317	0.594	0.406	0.055	0.614	0.541	0.39	0.068	0	0.517	0.483	0.45	0.442	0.108	0.327	0.371	0.302	0.068	4	1	1	-0.224	-0.108	-
MF2110019	P80147(39-499), P80147(39-499)	1ohv	AB	0.0998	0.2928	0.0716	0.0542	0.2733	0.1866	0.0217	0	0.439	0.146	0.414	0.598	0.402	0.689	0.311	0.582	0.418	0.072	0.728	0.532	0.384	0.084	0.07	0.46	0.47	0.46	0.437	0.103	0.265	0.393	0.342	0.089	4	1	1	-0.303	0.212	1.7e-23
MF2140011	P03049(5-43), P03049(5-43)	1mnt	AB	0.0769	0.3333	0.0256	0.0513	0.3333	0.1795	0	0	0.654	0.077	0.269	0.501	0.499	0.668	0.332	0.545	0.455	0.259	0.49	0.616	0.314	0.071	0.139	0.254	0.607	0.424	0.463	0.114	0.329	0.384	0.287	0.303	4	3	3	-0.4	0.757	7.7e-14
MF2140012	P03315(119-267), P03315(119-267)	1vcq	AB	0.0805	0.2819	0.1141	0.047	0.2953	0.1611	0.0201	0	0.067	0.45	0.483	0.582	0.418	0.536	0.464	0.592	0.408	0.016	0.663	0.297	0.552	0.152	0	0.71	0.29	0.461	0.437	0.102	0.265	0.4	0.335	0.031	3	1	1	-0.212	-0.046	3e-06
MF2140013	P03508(64-116), P03508(64-116)	1pd3	AB	0.1132	0.3019	0.0189	0	0.3774	0.1887	0	0	0.806	0	0.194	0.571	0.429	0.818	0.182	0.474	0.526	0.132	0.507	0.713	0.266	0.021	0	0.187	0.813	0.347	0.52	0.133	0.38	0.384	0.236	0.157	2	4	4	-0.435	0.553	1.5e-07
MF2120029	P06533(74-108), P06533(74-109)	2yal	AB	0.1408	0.1972	0.0282	0	0.4085	0.2254	0	0.033	0.662	0	0.338	0.566	0.434	0.722	0.278	0.448	0.552	0.216	0.391	0.682	0.267	0.051	0	0.277	0.723	0.372	0.496	0.133	0.4	0.399	0.202	0.267	2	2	2	-0.334	0.763	2.4e-08
MF2110020	Q5KR49(98-225), Q5KR49(93-225)	2b9c	AB	0.023	0.3218	0.0153	0	0.4904	0.1418	0.0077	0.01	0.888	0	0.112	0.573	0.427	0.824	0.176	0.371	0.629	0.139	0.414	0.699	0.272	0.029	0.007	0.393	0.601	0.291	0.562	0.147	0.495	0.407	0.097	0.148	2	2	2	-0.162	1	6.1e-11
MF2120030	P0C079(1-44), P0C079(1-44)	2k29	AB	0.0455	0.4318	0.0455	0.0227	0.3182	0.1364	0	0	0.636	0.159	0.205	0.463	0.537	0.776	0.224	0.542	0.458	0.252	0.428	0.624	0.329	0.046	0.168	0.364	0.468	0.376	0.502	0.121	0.382	0.449	0.169	0.285	4	5	5	-0.488	0.722	3.9e-11
MF2140014	Q0GBY3(90-133), Q0GBY3(90-133)	3l32	AB	0.1364	0.3409	0.0455	0	0.1818	0.2955	0	0	0.843	0	0.157	0.557	0.443	0.903	0.097	0.53	0.47	0.106	0.518	0.828	0.154	0.018	0	0.29	0.71	0.418	0.466	0.116	0.346	0.36	0.294	0.118	3	4	4	-0.594	0.588	5.4e-07
MF2140015	P12823(43-96), P12823(43-96)	1r6r	AB	0.0926	0.4259	0.0741	0.0556	0.2222	0.1296	0	0	0.759	0	0.241	0.631	0.369	0.821	0.179	0.605	0.395	0.157	0.565	0.721	0.23	0.049	0	0.312	0.688	0.446	0.457	0.096	0.369	0.457	0.173	0.18	4	4	4	-0.497	0.573	1.9e-05
MF2110021	Q2VIU1(30-82), Q2VIU1(35-82)	4aya	AB	0.0594	0.3861	0	0.0495	0.2772	0.2079	0.0198	0.054	0.645	0	0.355	0.594	0.406	0.886	0.114	0.568	0.432	0.123	0.476	0.784	0.191	0.025	0	0.261	0.739	0.428	0.46	0.112	0.336	0.419	0.245	0.148	4	4	4	-0.65	0.638	9.9e-08
MF2110022	P61898(9-116), P61898(9-116)	4ec7	AB	0.0926	0.2222	0.0556	0.0278	0.2593	0.287	0.0556	0	0	0.62	0.38	0.543	0.457	0.689	0.311	0.584	0.416	0.08	0.566	0.563	0.367	0.07	0.176	0.381	0.443	0.46	0.439	0.101	0.29	0.372	0.337	0.119	3	1	1	-0.285	0.179	4.9e-10
MF2120031	P62558(279-319), P62558(279-319)	3kz5	BE	0.0488	0.3659	0.0488	0.0488	0.3415	0.122	0.0244	0	0.295	0.389	0.316	0.557	0.443	0.699	0.301	0.555	0.445	0.18	0.428	0.583	0.357	0.06	0.163	0.264	0.573	0.389	0.486	0.124	0.412	0.386	0.202	0.287	4	3	3	-0.384	0.668	5.1e-08
MF2110023	Q08874(324-402), Q08874(324-402)	4ath	AB	0.038	0.3038	0.0253	0.0253	0.4051	0.2025	0	0	0.826	0	0.174	0.55	0.45	0.738	0.262	0.43	0.57	0.133	0.433	0.629	0.326	0.044	0	0.259	0.741	0.351	0.515	0.134	0.404	0.419	0.178	0.163	2	4	4	-0.269	0.697	5.5e-11
MF3100003	P08670(161-243), P08670(161-243), P08670(161-243)	4ypc	ABC	0.0241	0.3373	0	0	0.4458	0.1928	0	0	0.831	0	0.169	0.536	0.464	0.765	0.235	0.363	0.637	0.202	0.41	0.615	0.329	0.057	0	0.294	0.706	0.301	0.554	0.145	0.436	0.472	0.092	0.21	2	2	2	-0.1	0.914	-
MF2130002	Q9V011(616-722), Q9V011(616-722)	1mkh	AB	0.0654	0.4112	0.0748	0.0374	0.3551	0.0561	0	0	0.085	0.434	0.481	0.594	0.406	0.699	0.301	0.599	0.401	0.102	0.596	0.517	0.381	0.103	0.17	0.351	0.479	0.494	0.411	0.094	0.296	0.366	0.338	0.175	4	1	1	-0.432	0.302	-
MF2220002	A0A0H3LBN6(2-174), A0A0H3LBR3(8-89)	4w4k	AB	0.0863	0.4	0.0235	0.0588	0.2588	0.1686	0.0039	0.157	0.808	0	0.192	0.596	0.404	0.846	0.154	0.531	0.469	0.102	0.563	0.714	0.25	0.036	0.066	0.295	0.639	0.386	0.487	0.127	0.369	0.41	0.221	0.113	4	4	4	-0.47	0.379	1.7e-09
MF2100015	P08670(149-187), P08670(144-189)	3ssu	AB	0.0235	0.3294	0.0118	0	0.5059	0.1294	0	0.048	0.941	0	0.059	0.539	0.461	0.846	0.154	0.327	0.674	0.135	0.402	0.728	0.241	0.031	0.004	0.37	0.626	0.276	0.572	0.152	0.47	0.413	0.117	0.161	2	2	2	-0.256	0.89	7.4e-06
MF2100016	Q14258(195-356), Q14258(194-357)	4cfg	AB	0.0429	0.2975	0.0245	0.0123	0.365	0.2515	0.0061	0.008	0.865	0	0.135	0.547	0.453	0.771	0.229	0.43	0.57	0.175	0.44	0.63	0.314	0.056	0	0.275	0.725	0.296	0.552	0.152	0.474	0.401	0.125	0.196	2	2	2	-0.236	0.694	1.1e-16
MF4200001	Q96CV9(29-102), Q9UHD2(679-719), Q96CV9(29-102), Q9UHD2(678-720)	5eof	ABCD	0.0517	0.3017	0.0345	0.0216	0.3578	0.2328	0	0.322	0.866	0	0.134	0.607	0.393	0.786	0.214	0.385	0.615	0.242	0.394	0.659	0.291	0.049	0.004	0.333	0.663	0.308	0.553	0.139	0.479	0.398	0.123	0.272	2	2	2	-0.076	1	1.2e-11
MF4200002	O15350(356-387), Q9H3D4(400-441), Q9H3D4(400-441), O15350(356-387)	2nb1	ABCD	0.0811	0.3514	0.027	0.0541	0.2838	0.2027	0	0.339	0.709	0.093	0.198	0.548	0.452	0.752	0.248	0.44	0.56	0.256	0.353	0.671	0.268	0.062	0.119	0.221	0.66	0.321	0.54	0.139	0.468	0.388	0.144	0.309	4	2	6	-0.398	0.745	1.1e-09
MF2200012	P51825(760-774), P42568(490-568)	2lm0	AB	0.0532	0.3085	0.0319	0.0106	0.3191	0.2553	0.0213	0.668	0.33	0.085	0.585	0.547	0.453	0.761	0.239	0.555	0.445	0.103	0.422	0.617	0.312	0.07	0.078	0.305	0.617	0.404	0.47	0.126	0.343	0.408	0.249	0.144	3	4	4	-0.505	0.206	-
MF2200013	P42568(504-562), Q9HC52(333-343)	2n4q	AB	0.0571	0.3857	0.0143	0.0143	0.3143	0.2	0.0143	0.992	0.556	0.153	0.292	0.558	0.442	0.799	0.201	0.567	0.433	0.091	0.504	0.585	0.331	0.085	0.263	0.331	0.407	0.413	0.462	0.125	0.361	0.393	0.246	0.122	2	1	6	-0.66	0.181	5.8e-06
MF2200014	P42568(501-562), Q8TEK3(879-890)	2mv7	AB	0.0676	0.3784	0.0135	0.027	0.2838	0.2162	0.0135	1.022	0.587	0.147	0.267	0.615	0.385	0.741	0.259	0.552	0.448	0.125	0.524	0.556	0.371	0.073	0.145	0.395	0.46	0.422	0.449	0.128	0.321	0.387	0.292	0.224	4	5	5	-0.776	0.265	2.2e-09
MF3140002	P59594(1140-1193), P59594(1140-1193), P59594(1140-1193)	2fxp	ABC	0.037	0.3333	0.0556	0.0185	0.2963	0.2593	0	0	0.636	0	0.364	0.499	0.501	0.822	0.178	0.443	0.557	0.217	0.327	0.726	0.245	0.029	0.008	0.386	0.606	0.339	0.529	0.132	0.474	0.454	0.073	0.289	4	5	5	-0.165	0.857	7.4e-10
MF3100004	Q13563(833-895), Q13563(833-895), Q13563(833-895)	3hrn	ABC	0.0317	0.4127	0.0794	0	0.3968	0.0794	0	0	0.937	0	0.063	0.643	0.357	0.767	0.233	0.398	0.602	0.149	0.42	0.691	0.236	0.073	0.024	0.218	0.758	0.298	0.555	0.147	0.439	0.412	0.148	0.116	4	2	6	-0.206	0.85	-
MF2110024	P31007(6-95), P31007(5-95)	4rp3	AB	0.0773	0.3646	0.011	0.011	0.3591	0.1768	0	0.014	0.751	0.05	0.199	0.583	0.417	0.74	0.26	0.479	0.521	0.166	0.456	0.612	0.326	0.061	0.06	0.372	0.568	0.382	0.493	0.126	0.387	0.373	0.24	0.219	2	5	6	-0.46	0.663	3e-11
MF2110025	P04268(1-77), P04268(1-79)	1ic2	AB	0.0128	0.3397	0.0128	0	0.5	0.1346	0	0.027	0.949	0	0.051	0.583	0.417	0.838	0.162	0.377	0.623	0.154	0.401	0.696	0.268	0.035	0.008	0.376	0.615	0.307	0.549	0.144	0.483	0.407	0.11	0.161	2	2	2	-0.1	1	7e-09
MF2110026	P63004(2-75), P63004(2-77)	1uuj	AB	0.08	0.32	0.0267	0	0.4	0.1733	0	0.032	0.773	0	0.227	0.511	0.489	0.779	0.221	0.487	0.513	0.139	0.479	0.672	0.267	0.06	0	0.31	0.69	0.374	0.498	0.129	0.373	0.405	0.222	0.185	2	4	4	-0.31	0.611	2e-09
MF2110027	Q9ZP49(22-140), Q9ZP49(22-140)	1b2p	AB	0.084	0.3445	0.0756	0.0504	0.1681	0.2605	0.0168	0	0	0.462	0.538	0.542	0.458	0.667	0.333	0.604	0.396	0.101	0.612	0.499	0.39	0.111	0.146	0.381	0.474	0.462	0.44	0.098	0.265	0.413	0.322	0.194	3	1	1	-0.395	0.192	8.5e-12
MF2110028	P00514(17-59), P00514(17-59)	2ezw	AB	0.093	0.3256	0	0.0465	0.3488	0.1395	0.0465	0	0.581	0	0.419	0.586	0.414	0.789	0.211	0.506	0.494	0.148	0.438	0.705	0.277	0.017	0.017	0.329	0.654	0.422	0.459	0.119	0.356	0.393	0.251	0.247	4	5	5	-0.358	0.827	1.3e-06
MF2110029	Q62627(255-332), Q62627(254-331)	5fiy	AB	0.0064	0.3077	0.0256	0	0.4551	0.2051	0	0.026	0.955	0	0.045	0.558	0.442	0.758	0.242	0.362	0.638	0.146	0.398	0.584	0.332	0.083	0	0.291	0.709	0.289	0.565	0.146	0.503	0.387	0.109	0.194	2	2	2	-0.234	0.962	1.1e-08
MF4110009	F6SSG7(374-419), F6SSG7(374-419), F6SSG7(374-419), F6SSG7(374-419)	2mw4	ABCD	0.087	0.2826	0.0435	0.0217	0.3913	0.1304	0.0435	0	0.548	0.149	0.303	0.496	0.504	0.655	0.345	0.516	0.484	0.341	0.366	0.593	0.334	0.073	0.151	0.376	0.473	0.411	0.481	0.108	0.39	0.425	0.185	0.538	2	3	3	-0.558	0.698	2e-15
MF6240001	P11209(160-207), P11209(480-515), P11209(160-209), P11209(480-519), P11209(160-207), P11209(480-515)	1g2c	ABCDEF	0.0465	0.3798	0.0271	0.0349	0.2364	0.2752	0	0.351	0.86	0	0.14	0.562	0.438	0.828	0.172	0.421	0.579	0.325	0.376	0.698	0.261	0.041	0.019	0.323	0.658	0.307	0.549	0.144	0.498	0.429	0.074	0.316	1	2	2	-0.356	0.898	1.6e-11
MF4140003	P03422(307-360), P03422(307-360), P03422(307-360), P03422(307-360)	4bhv	ABCD	0.037	0.3519	0.0185	0	0.3519	0.2407	0	0	0.925	0	0.075	0.595	0.405	0.753	0.247	0.412	0.588	0.253	0.399	0.628	0.304	0.068	0.002	0.217	0.781	0.315	0.548	0.137	0.478	0.424	0.098	0.235	2	2	2	-0.156	0.812	2.5e-09
MF4140004	P14335(25-97), P14335(25-97), P14335(25-97), P14335(41-97)	1sfk	ABCD	0.087	0.3913	0.0507	0.029	0.2355	0.2065	0	0.097	0.728	0	0.272	0.601	0.399	0.789	0.211	0.546	0.454	0.182	0.498	0.737	0.228	0.034	0	0.358	0.642	0.374	0.501	0.125	0.404	0.411	0.185	0.214	4	5	5	-0.232	0.532	6.8e-10
MF2100017	Q15691(191-249), Q15691(191-257)	1wu9	AB	0.0714	0.3492	0.0397	0.0238	0.3413	0.1587	0.0159	0.07	0.833	0	0.167	0.566	0.434	0.855	0.145	0.454	0.546	0.152	0.441	0.757	0.213	0.03	0.004	0.34	0.656	0.335	0.526	0.139	0.43	0.422	0.148	0.198	4	2	6	-0.424	0.784	3.2e-07
MF6140001	P59594(1154-1180), P59594(901-949), P59594(1153-1182), P59594(901-949), P59594(1154-1182), P59594(902-947)	1zv8	ABCDEF	0.013	0.3826	0.0174	0	0.1783	0.4087	0	0.533	0.822	0	0.178	0.527	0.473	0.733	0.267	0.357	0.643	0.349	0.335	0.552	0.363	0.085	0.001	0.464	0.535	0.292	0.55	0.158	0.482	0.428	0.09	0.356	1	2	2	-0.302	0.853	1.3e-14
MF2120032	O68014(1-87), O68014(1-87)	3m1e	AB	0.0805	0.3448	0.0345	0.046	0.2644	0.2184	0.0115	0	0.724	0.023	0.253	0.55	0.45	0.81	0.19	0.564	0.436	0.083	0.593	0.705	0.262	0.033	0.003	0.393	0.603	0.438	0.448	0.114	0.326	0.395	0.279	0.088	4	4	4	-0.385	0.279	-
MF2210015	P02293(38-130), P04912(17-119)	4kud	CD	0.0561	0.3571	0.0612	0.0357	0.2398	0.25	0	0.337	0.643	0.041	0.316	0.539	0.461	0.741	0.259	0.536	0.464	0.162	0.493	0.604	0.326	0.07	0.097	0.353	0.55	0.382	0.494	0.124	0.383	0.417	0.201	0.223	4	5	5	-0.547	0.48	9.5e-13
MF2120033	P09546(3-45), P09546(3-44)	2ay0	AB	0.0706	0.3294	0.0235	0.0235	0.3176	0.2353	0	0.032	0.647	0.165	0.188	0.569	0.431	0.728	0.272	0.505	0.495	0.214	0.402	0.565	0.36	0.075	0.188	0.288	0.524	0.393	0.484	0.123	0.416	0.39	0.195	0.263	4	3	3	-0.399	0.708	2.6e-11
MF4140005	P59594(1153-1185), P59594(1150-1187), P59594(1150-1187), P59594(1153-1185)	1zv7	ABCD	0	0.4085	0.0423	0	0.2817	0.2676	0	0.078	0.944	0	0.056	0.536	0.464	0.82	0.18	0.367	0.633	0.267	0.384	0.706	0.261	0.033	0	0.317	0.683	0.29	0.56	0.15	0.505	0.413	0.082	0.221	1	2	2	-0.24	0.84	1.9e-05
MF2200015	P62807(29-126), Q96QV6(15-120)	5gt0	CD	0.0539	0.3529	0.0735	0.0343	0.2794	0.2059	0	0.32	0.627	0.039	0.333	0.553	0.447	0.764	0.236	0.519	0.481	0.158	0.474	0.639	0.307	0.054	0.08	0.402	0.518	0.372	0.499	0.13	0.379	0.408	0.213	0.235	4	5	5	-0.539	0.455	6e-12
MF2200016	P20671(14-119), Q96A08(33-127)	5gt3	CD	0.0547	0.3632	0.0597	0.0348	0.2736	0.2139	0	0.339	0.642	0.04	0.318	0.566	0.434	0.75	0.25	0.521	0.479	0.161	0.471	0.625	0.311	0.064	0.071	0.414	0.514	0.363	0.502	0.135	0.388	0.411	0.202	0.239	4	5	5	-0.542	0.451	8.4e-12
MF2200017	Q6NXT2(38-134), P62805(21-103)	4z5t	AB	0.0667	0.3556	0.0722	0.0278	0.3167	0.1556	0.0056	0.155	0.644	0.044	0.311	0.559	0.441	0.756	0.244	0.492	0.508	0.168	0.48	0.617	0.329	0.053	0.062	0.426	0.512	0.365	0.506	0.129	0.377	0.388	0.235	0.241	4	5	5	-0.464	0.437	3.2e-12
MF2120034	P96621(7-52), P96621(6-52)	4me7	EF	0.0215	0.3548	0.0215	0.0215	0.3656	0.2151	0	0.028	0.71	0.086	0.204	0.531	0.469	0.657	0.343	0.407	0.593	0.231	0.383	0.473	0.398	0.13	0.127	0.239	0.634	0.314	0.531	0.155	0.436	0.348	0.216	0.311	2	3	3	-0.246	0.638	4.4e-10
MF2211003	P40338(123-137), Q03071(3-99)	1hv2	AB	0.0804	0.3393	0.0268	0.0357	0.3304	0.1786	0.0089	0.33	0.527	0.143	0.33	0.593	0.407	0.819	0.181	0.554	0.446	0.056	0.566	0.664	0.282	0.055	0	0.336	0.664	0.435	0.454	0.111	0.356	0.387	0.258	0.063	4	4	4	-0.424	0.198	3.2e-05
MF2200018	P01730(430-448), P06239(11-28)	1q68	AB	0.0541	0.2432	0	0.0541	0.3514	0.1892	0.1081	0.374	0.378	0	0.622	0.52	0.48	0.83	0.17	0.529	0.471	0.152	0.344	0.699	0.276	0.024	0.073	0.407	0.52	0.379	0.497	0.124	0.466	0.434	0.1	0.298	3	5	6	-0.79	0.683	4.2e-07
Parameter name shorthands:
Secondary structures:
SSa, SSb, SSc - fraction of residues in alpha helical, extended and irregular conformations, respectively
Molecular surfaces:
SASA, INT and BUR mark the solvent accessible surface areas, interfaces and buried surfaces, respectively. H and P mark hydrophobic and polar fractions.
TOT means the sum of SASA and the interface
Atomic contacts:
inter and intra mean contacts formed between atoms of different or the same protein chains
HH - contacts between hydrophobic atoms, HP - contacts between a hydrophobic and a polar atom, PP - contacts between polar atoms
BB - contacts between backbone atoms, BS - contacts between a backbone and a sidechain atom, SS - constacts between sidechain atoms
inter/total marks the ratio of interchain contacts to all (inter+intrachain) contacts
Energies:
Etot means the total interaction energy between residue pairs at least one of which belongs to the protein in question
res marks the number of residues in the protein
Eint marks the total interaction energy between the protein and its interacting partner(s)

## Sheet: Table S2
Parameter groups	Parameter name	Mean	StdDev	Aromatic (FWY)	Hydrophobic (AILMV)	Flexible (G)	Rigid (P)	Charged (HKRDE)	Polar (NQST)	Cysteine (C)	Dissimilarity between subunits	SSa	SSb	SSc	SASA/H	SASA/P	INT/H	INT/P	BUR/H	BUR/P	INT/TOT	BUR/TOT	interHH	interHP	interPP	interBB	interBS	interSS	intraHH	intraHP	intraPP	intraBB	intraBS	intraSS	inter/total
Residue composition	Aromatic (FWY)	0.063	0.033	1	-0.504	0.344	0.399	-0.337	-0.127	0.231	-0.185	-0.571	0.513	0.515	-0.029	0.029	-0.352	0.352	0.633	-0.633	-0.354	0.499	-0.241	0.241	0.198	0.44	0.046	-0.346	0.642	-0.646	-0.598	-0.659	-0.367	0.682	-0.13
	Hydrophobic (AILMV)	0.337	0.049	-0.504	1	-0.14	-0.022	-0.107	-0.225	-0.362	0.146	0.388	-0.413	-0.273	0.234	-0.234	0.373	-0.374	-0.156	0.156	0.219	-0.194	0.352	-0.361	-0.267	-0.24	-0.022	0.186	-0.256	0.26	0.229	0.304	0.181	-0.318	0.077
	Flexible (G)	0.046	0.032	0.344	-0.14	1	0.388	-0.541	-0.121	0.139	-0.06	-0.677	0.582	0.643	-0.009	0.009	-0.432	0.431	0.574	-0.574	-0.406	0.614	-0.394	0.408	0.289	0.485	0.375	-0.591	0.57	-0.561	-0.561	-0.611	-0.244	0.6	-0.282
	Rigid (P)	0.025	0.022	0.399	-0.022	0.388	1	-0.493	-0.213	0.167	0.011	-0.502	0.36	0.563	0.19	-0.19	-0.291	0.292	0.605	-0.605	-0.299	0.513	-0.182	0.209	0.084	0.316	0.205	-0.36	0.538	-0.541	-0.505	-0.567	-0.244	0.563	-0.184
	Charged (HKRDE)	0.307	0.074	-0.337	-0.107	-0.541	-0.493	1	-0.462	-0.2	-0.062	0.561	-0.451	-0.571	-0.105	0.105	0.303	-0.303	-0.578	0.578	0.277	-0.514	0.246	-0.232	-0.236	-0.396	-0.169	0.394	-0.523	0.526	0.492	0.541	0.105	-0.494	0.23
	Polar (NQST)	0.212	0.058	-0.127	-0.225	-0.121	-0.213	-0.462	1	0.005	0.112	-0.024	0.053	-0.015	-0.085	0.085	-0.089	0.089	-0.132	0.132	0.071	-0.056	-0.134	0.104	0.181	-0.003	-0.106	0.071	-0.105	0.096	0.123	0.069	0.199	-0.125	-0.022
	Cysteine (C)	0.01	0.016	0.231	-0.362	0.139	0.167	-0.2	0.005	1	-0.068	-0.468	0.432	0.409	-0.094	0.094	-0.227	0.227	0.343	-0.343	-0.254	0.214	-0.191	0.195	0.144	0.263	0.114	-0.263	0.376	-0.372	-0.366	-0.317	-0.168	0.325	-0.137
	Dissimilarity between subunits	0.106	0.17	-0.185	0.146	-0.06	0.011	-0.062	0.112	-0.068	1	0.132	-0.224	0.007	0.089	-0.089	0.146	-0.146	-0.08	0.08	0.146	-0.129	0.061	-0.075	-0.014	-0.065	0.113	-0.026	-0.104	0.078	0.164	0.092	0.148	-0.127	0.134
Secondary structures	SSa	0.603	0.297	-0.571	0.388	-0.677	-0.502	0.561	-0.024	-0.468	0.132	1	-0.918	-0.88	0.044	-0.044	0.615	-0.615	-0.774	0.774	0.574	-0.679	0.564	-0.593	-0.394	-0.765	-0.227	0.697	-0.811	0.808	0.776	0.804	0.421	-0.823	0.335
	SSb	0.131	0.18	0.513	-0.413	0.582	0.36	-0.451	0.053	0.432	-0.224	-0.918	1	0.619	-0.065	0.065	-0.627	0.627	0.63	-0.63	-0.464	0.597	-0.612	0.638	0.443	0.782	0.122	-0.641	0.672	-0.662	-0.663	-0.659	-0.503	0.727	-0.28
	SSc	0.266	0.15	0.515	-0.273	0.643	0.563	-0.571	-0.015	0.409	0.007	-0.88	0.619	1	-0.008	0.008	-0.467	0.466	0.777	-0.777	-0.582	0.628	-0.383	0.409	0.25	0.578	0.303	-0.611	0.8	-0.806	-0.741	-0.802	-0.231	0.758	-0.328
Molecular surfaces	SASA/H	0.555	0.044	-0.029	0.234	-0.009	0.19	-0.105	-0.085	-0.094	0.089	0.044	-0.065	-0.008	1	-1	0.101	-0.1	-0.109	0.109	-0.243	0.075	0.033	-0.039	-0.013	-0.135	-0.058	0.135	-0.116	0.099	0.149	0.041	-0.1	-0.002	-0.334
	SASA/P	0.445	0.044	0.029	-0.234	0.009	-0.19	0.105	0.085	0.094	-0.089	-0.044	0.065	0.008	-1	1	-0.101	0.1	0.109	-0.109	0.243	-0.075	-0.033	0.039	0.013	0.135	0.058	-0.135	0.116	-0.099	-0.149	-0.041	0.1	0.002	0.334
	INT/H	0.75	0.063	-0.352	0.373	-0.432	-0.291	0.303	-0.089	-0.227	0.146	0.615	-0.627	-0.467	0.101	-0.101	1	-1	-0.437	0.437	0.165	-0.421	0.839	-0.818	-0.74	-0.533	-0.247	0.543	-0.455	0.456	0.428	0.47	0.443	-0.547	0.014
	INT/P	0.251	0.063	0.352	-0.374	0.431	0.292	-0.303	0.089	0.227	-0.146	-0.615	0.627	0.466	-0.1	0.1	-1	1	0.437	-0.437	-0.166	0.421	-0.839	0.818	0.74	0.533	0.248	-0.543	0.455	-0.456	-0.428	-0.471	-0.443	0.547	-0.014
	BUR/H	0.498	0.08	0.633	-0.156	0.574	0.605	-0.578	-0.132	0.343	-0.08	-0.774	0.63	0.777	-0.109	0.109	-0.437	0.437	1	-1	-0.615	0.799	-0.327	0.356	0.201	0.624	0.265	-0.62	0.938	-0.933	-0.901	-0.886	-0.378	0.878	-0.384
	BUR/P	0.502	0.08	-0.633	0.156	-0.574	-0.605	0.578	0.132	-0.343	0.08	0.774	-0.63	-0.777	0.109	-0.109	0.437	-0.437	-1	1	0.615	-0.799	0.327	-0.356	-0.201	-0.624	-0.265	0.621	-0.938	0.933	0.901	0.886	0.378	-0.878	0.384
	INT/TOT	0.157	0.068	-0.354	0.219	-0.406	-0.299	0.277	0.071	-0.254	0.146	0.574	-0.464	-0.582	-0.243	0.243	0.165	-0.166	-0.615	0.615	1	-0.745	0.176	-0.21	-0.063	-0.291	-0.197	0.336	-0.649	0.653	0.605	0.67	0.284	-0.663	0.868
	BUR/TOT	0.485	0.089	0.499	-0.194	0.614	0.513	-0.514	-0.056	0.214	-0.129	-0.679	0.597	0.628	0.075	-0.075	-0.421	0.421	0.799	-0.799	-0.745	1	-0.357	0.385	0.227	0.447	0.32	-0.528	0.813	-0.808	-0.783	-0.852	-0.381	0.85	-0.682
Atomic contacts	interHH	0.627	0.077	-0.241	0.352	-0.394	-0.182	0.246	-0.134	-0.191	0.061	0.564	-0.612	-0.383	0.033	-0.033	0.839	-0.839	-0.327	0.327	0.176	-0.357	1	-0.979	-0.873	-0.591	-0.27	0.599	-0.345	0.352	0.309	0.366	0.403	-0.445	0.036
	interHP	0.314	0.057	0.241	-0.361	0.408	0.209	-0.232	0.104	0.195	-0.075	-0.593	0.638	0.409	-0.039	0.039	-0.818	0.818	0.356	-0.356	-0.21	0.385	-0.979	1	0.754	0.618	0.328	-0.656	0.374	-0.378	-0.344	-0.385	-0.417	0.466	-0.062
	interPP	0.059	0.024	0.198	-0.267	0.289	0.084	-0.236	0.181	0.144	-0.014	-0.394	0.443	0.25	-0.013	0.013	-0.74	0.74	0.201	-0.201	-0.063	0.227	-0.873	0.754	1	0.42	0.085	-0.356	0.215	-0.229	-0.172	-0.253	-0.3	0.315	0.032
	interBB	0.075	0.079	0.44	-0.24	0.485	0.316	-0.396	-0.003	0.263	-0.065	-0.765	0.782	0.578	-0.135	0.135	-0.533	0.533	0.624	-0.624	-0.291	0.447	-0.591	0.618	0.42	1	0.07	-0.764	0.61	-0.608	-0.581	-0.574	-0.461	0.641	-0.04
	interBS	0.339	0.071	0.046	-0.022	0.375	0.205	-0.169	-0.106	0.114	0.113	-0.227	0.122	0.303	-0.058	0.058	-0.247	0.248	0.265	-0.265	-0.197	0.32	-0.27	0.328	0.085	0.07	1	-0.697	0.278	-0.266	-0.29	-0.262	-0.055	0.241	-0.102
Interaction energies	interSS	0.586	0.11	-0.346	0.186	-0.591	-0.36	0.394	0.071	-0.263	-0.026	0.697	-0.641	-0.611	0.135	-0.135	0.543	-0.543	-0.62	0.621	0.336	-0.528	0.599	-0.656	-0.356	-0.764	-0.697	1	-0.619	0.609	0.605	0.582	0.367	-0.617	0.094
	intraHH	0.381	0.061	0.642	-0.256	0.57	0.538	-0.523	-0.105	0.376	-0.104	-0.811	0.672	0.8	-0.116	0.116	-0.455	0.455	0.938	-0.938	-0.649	0.813	-0.345	0.374	0.215	0.61	0.278	-0.619	1	-0.994	-0.962	-0.929	-0.362	0.909	-0.412
	intraHP	0.494	0.044	-0.646	0.26	-0.561	-0.541	0.526	0.096	-0.372	0.078	0.808	-0.662	-0.806	0.099	-0.099	0.456	-0.456	-0.933	0.933	0.653	-0.808	0.352	-0.378	-0.229	-0.608	-0.266	0.609	-0.994	1	0.926	0.929	0.378	-0.915	0.418
	intraPP	0.125	0.018	-0.598	0.229	-0.561	-0.505	0.492	0.123	-0.366	0.164	0.776	-0.663	-0.741	0.149	-0.149	0.428	-0.428	-0.901	0.901	0.605	-0.783	0.309	-0.344	-0.172	-0.581	-0.29	0.605	-0.962	0.926	1	0.879	0.299	-0.846	0.378
	intraBB	0.384	0.076	-0.659	0.304	-0.611	-0.567	0.541	0.069	-0.317	0.092	0.804	-0.659	-0.802	0.041	-0.041	0.47	-0.471	-0.886	0.886	0.67	-0.852	0.366	-0.385	-0.253	-0.574	-0.262	0.582	-0.929	0.929	0.879	1	0.297	-0.948	0.476
	intraBS	0.403	0.03	-0.367	0.181	-0.244	-0.244	0.105	0.199	-0.168	0.148	0.421	-0.503	-0.231	-0.1	0.1	0.443	-0.443	-0.378	0.378	0.284	-0.381	0.403	-0.417	-0.3	-0.461	-0.055	0.367	-0.362	0.378	0.299	0.297	1	-0.586	0.156
	intraSS	0.212	0.09	0.682	-0.318	0.6	0.563	-0.494	-0.125	0.325	-0.127	-0.823	0.727	0.758	-0.002	0.002	-0.547	0.547	0.878	-0.878	-0.663	0.85	-0.445	0.466	0.315	0.641	0.241	-0.617	0.909	-0.915	-0.846	-0.948	-0.586	1	-0.455
	inter/total	0.201	0.082	-0.13	0.077	-0.282	-0.184	0.23	-0.022	-0.137	0.134	0.335	-0.28	-0.328	-0.334	0.334	0.014	-0.014	-0.384	0.384	0.868	-0.682	0.036	-0.062	0.032	-0.04	-0.102	0.094	-0.412	0.418	0.378	0.476	0.156	-0.455	1
			- omitted from clustering
			- used in clustering
		Parameter name shorthands:
		Secondary structures:
		SSa, SSb, SSc - fraction of residues in alpha helical, extended and irregular conformations, respectively
		Molecular surfaces:
		SASA, INT and BUR mark the solvent accessible surface areas, interfaces and buried surfaces, respectively. H and P mark hydrophobic and polar fractions.
		TOT means the sum of SASA and the interface
		Atomic contacts:
		inter and intra mean contacts formed between atoms of different or the same protein chains
		HH - contacts between hydrophobic atoms, HP - contacts between a hydrophobic and a polar atom, PP - contacts between polar atoms
		BB - contacts between backbone atoms, BS - contacts between a backbone and a sidechain atom, SS - constacts between sidechain atoms
		inter/total marks the ratio of interchain contacts to all (inter+intrachain) contacts

## Sheet: Table S3
IDs			Interaction energies
PDB ID	Chain ID for interactor 1	Chain ID for interactor 2	Etot/res	Eint/Etot
1bsr	A	B	-0.481	0.220		Etot means the total interaction energy between residue pairs at least one of which belongs to the protein in question
137l	A	B	-0.590	0		res marks the number of residues in the protein
1a19	A	B	-0.730	0.144		Eint marks the total interaction energy between the protein and its interacting partner(s)
1lib	A	B	-0.399	0.054
3i6j	A	B	-0.388	0
1a3y	A	B	-0.407	0
2qrz	A	B	-0.612	0.064
4p82	A	B	-0.542	0
1xpc	A	B	-0.698	0.049
1cdc	B	A	-0.848	0.709
1eym	A	B	-0.366	0
1tw7	A	B	-0.786	0.225
2pea	A	B	-0.580	0.154
1fvk	A	B	-0.582	0
1qid	A	B	-0.569	0.070
1afs	A	B	-0.679	0.063
1tpf	A	B	-0.681	0.097
1ag9	A	B	-0.671	0.032
1ah6	A	B	-0.681	0.044
1alu	A	B	-0.592	0
2ngr	A	B	-0.584	0.058
2ngr	B	A	-0.707	0.047
1aq0	A	B	-0.631	0.021
1awp	A	B	-0.308	0
1ay7	A	B	-0.344	0.027
1ay7	B	A	-0.679	0.015
1ayf	A	B	-0.622	0.154
3fsv	A	B	-0.607	0.347
2af2	A	B	-0.170	0.004
4p2e	A	B	-0.530	0
1ciz	A	B	-0.348	0
1b7a	A	B	-0.357	0
1b8c	A	B	-0.644	0
1bc2	A	B	-0.589	0.040
1bd9	A	B	-0.390	0.019
1bdj	A	B	-0.572	0
1bdj	B	A	-0.435	0
1bhh	A	B	-0.448	0
1bkp	A	B	-0.482	0.026
1bu5	A	B	-0.608	0.006
1byu	A	B	-0.479	0
2bls	A	B	-0.486	0
1c3r	A	B	-0.542	0.020
1c6o	A	B	-0.342	0.002
1c79	A	B	-0.533	0.018
1cbi	A	B	-0.343	0.158
2cd0	A	B	-0.175	0
3in8	A	B	-0.629	0.101
3ln2	A	B	-0.646	0
1cku	A	B	-0.275	0.077
1cm9	A	B	-0.584	0.082
1cop	D	E	-0.514	0.220
1cse	E	I	-0.501	0
1cse	I	E	-0.406	0
4dfr	A	B	-0.578	0
1fp6	A	B	-0.632	0.097
1dfj	E	I	-0.360	0
1dfj	I	E	-0.677	0
1dhf	A	B	-0.475	0
1djt	A	B	-0.879	0.009
1dmx	A	B	-0.486	0.011
1doa	A	B	-0.600	0.068
1doa	B	A	-0.394	0.099
1dqe	A	B	-0.457	0
1dqz	A	B	-0.371	0.092
1dvr	A	B	-0.349	0
1e4m	M	A	-0.507	0
1e96	A	B	-0.597	0.011
1e96	B	A	-0.666	0.009
1eaj	A	B	-0.563	0.013
1ecy	A	B	-0.457	0.049
1qac	A	B	-0.481	0.114
1ef3	A	B	-0.600	0.011
1efh	A	B	-0.706	0.046
1ezg	A	B	-1.213	0.010
1f46	A	B	-0.551	0
2rse	A	B	-0.396	0
2rse	B	A	-0.549	0
1fbu	A	B	-0.481	0
1fd4	A	B	-0.964	0.176
3iwl	A	B	-0.635	0
1fkk	A	B	-0.360	0
1flm	A	B	-0.572	0.093
1foc	A	B	-0.557	0.084
1fr8	A	B	-0.461	0.013
1fss	A	B	-0.532	0.004
1fss	B	A	-0.638	0.031
1ftp	A	B	-0.491	0.079
3p2p	A	B	-0.463	0
1fxr	A	B	-0.389	0
1uzz	A	B	-0.493	0.120
3ls6	A	B	-0.385	0
1gt1	A	B	-0.565	0.416
1gam	A	B	-0.701	0.051
1ge7	A	B	-0.305	0
1gfl	A	B	-0.391	0
1rgh	A	B	-0.301	0
1gpw	A	B	-0.668	0.021
1gpw	B	A	-0.664	0.027
1gu3	A	B	-0.377	0
1gvj	A	B	-0.735	0.187
1gwl	A	B	-0.514	0
4nlj	A	B	-0.660	0.063
2g87	A	B	-0.746	0.068
1h8x	A	B	-0.332	0
1hdf	A	B	-0.452	0.057
1hmk	A	B	-0.622	0.002
1hh4	A	D	-0.557	0.092
1hh4	D	A	-0.398	0.126
1hpc	A	B	-0.300	0
1hrh	A	B	-0.432	0
1ht9	A	B	-0.790	0.712
1hun	A	B	-0.440	0
1hur	A	B	-0.696	0.060
4n92	B	A	-0.471	0
1i4j	A	B	-0.534	0.047
3hj5	A	B	-0.424	0.753
1i5c	A	B	-0.527	0
1iaz	A	B	-0.526	0.005
2il8	A	B	-0.555	0.080
1ihb	A	B	-0.399	0
1ii6	A	B	-0.469	0.034
1ilr	1	2	-0.519	0
1ips	A	B	-0.518	0.014
1iqb	A	B	-1.199	0.025
1ix1	A	B	-0.405	0
1n57	A	B	-0.416	0.047
1pod	A	B	-0.542	0.165
1j4v	A	B	-0.822	0.685
4fkb	A	B	-0.433	0.024
1jl9	A	B	-0.874	0.088
1jr5	A	B	-0.726	0.141
1k9j	A	B	-0.484	0
1k9u	A	B	-0.761	0.784
1p1c	A	B	-0.564	0
1prg	A	B	-0.647	0.014
1ktj	A	B	-0.315	0
1ktn	A	B	-0.578	0.026
1kxi	A	B	-0.957	0.311
1lfa	A	B	-0.724	0
1lhp	A	B	-0.440	0.104
3de8	A	D	-0.314	0
1ln0	A	B	-0.331	0.065
1lw6	E	I	-0.428	0.004
1lw6	I	E	-0.533	0.015
1lxe	A	B	-0.463	0.561
1lyn	A	B	-0.695	0.088
1sq0	A	B	-0.755	0.004
1sq0	B	A	-0.762	0.003
1m9x	A	D	-0.429	0
1m9x	D	A	-0.434	0
2rlz	A	B	-0.390	0.300
1n1a	A	B	-0.415	0
1n46	A	B	-0.607	0
1n9j	A	B	-0.586	0.767
1nbc	A	B	-0.512	0
1nco	A	B	-0.449	0
2g74	A	B	-0.352	0
1o81	A	B	-0.689	0
1o7z	A	B	-0.420	0.026
1ohq	A	B	-0.496	0.194
1oiv	A	B	-0.651	0.055
1okh	A	B	-0.477	0.115
1pio	A	B	-0.408	0
1oo9	A	B	-0.436	0.208
1oo9	B	A	-0.738	0.164
1opa	A	B	-0.276	0
1tx4	A	B	-0.702	0.028
1tx4	B	A	-0.538	0.040
1oxl	A	B	-0.530	0.062
1pob	A	B	-0.569	0.001
1pq9	A	B	-0.573	0.062
1q10	A	B	-0.464	0.824
1qav	A	B	-0.460	0
1qav	B	A	-0.570	0
1qbk	B	C	-0.461	0
1qbk	C	B	-0.594	0
1qkd	A	B	-0.572	0.085
4bk6	A	B	-0.399	0.048
1qve	A	B	-0.381	0.010
3ink	C	D	-0.779	0.041
1qwd	A	B	-0.508	0
1r0r	E	I	-0.533	0.010
1r0r	I	E	-0.619	0.046
1r1d	A	B	-0.476	0.006
1re6	A	B	-0.686	0.215
1rzl	A	B	-0.505	0
2zbs	A	B	-0.629	0
1sbn	E	I	-0.376	0
1sbn	I	E	-0.261	0
1smx	A	B	-0.648	0.184
1sph	A	B	-0.472	0
1t1v	A	B	-0.379	0
4hg7	A	B	-0.674	0.003
1t6m	A	B	-0.439	0
1tc6	A	B	-0.498	0.151
2tec	E	I	-0.389	0
2tec	I	E	-0.350	0
1tu6	A	B	-0.431	0
1xaf	A	B	-0.494	0.005
1vp6	A	C	-0.764	0.050
1u5s	A	B	-0.231	0.018
1u5s	B	A	-0.627	0.007
1zl7	A	B	-0.757	0.217
3e5t	A	B	-0.393	0.082
2dc3	A	B	-0.627	0.071
2gzu	A	B	-0.743	0.176
1uuz	A	D	-0.423	0
1uuz	D	A	-0.474	0
1v3z	A	B	-0.411	0.041
1v5i	A	B	-0.438	0.020
1v5i	B	A	-0.411	0.075
1v6p	A	B	-0.515	0
1vc1	A	B	-0.791	0.075
1vdr	A	B	-0.494	0.002
2doo	A	B	-0.504	0.014
1vka	A	B	-0.591	0
4qa4	A	B	-0.691	0.031
1vkp	A	B	-0.445	0.009
1vls	A	B	-0.344	0.120
1vlz	A	B	-0.679	0
1vrs	A	D	-0.588	0.161
1vrs	D	A	-0.611	0.164
4gje	A	B	-0.420	0
2nml	A	B	-0.671	0.140
1wzd	A	B	-0.506	0
1x6i	A	B	-0.552	0
1x77	A	B	-0.570	0.061
1x9x	A	B	-0.687	0.051
1xca	A	B	-0.376	0.079
1xd3	A	B	-0.525	0.055
1xd3	B	A	-0.640	0.138
1xef	A	B	-0.586	0.017
1xt3	A	B	-0.835	0
3zxh	A	B	-0.382	0.039
1xvj	A	B	-0.552	0.001
1qj4	A	B	-0.691	0.042
1yxj	A	B	-0.593	-0.000
1ypt	A	B	-0.383	0
1yvo	A	B	-0.471	0.077
1z5y	D	E	-0.586	0.134
1z5y	E	D	-0.587	0.116
1zcp	A	B	-0.924	0.164
1zm1	A	B	-0.387	0
1ztv	A	B	-0.678	0.001
1zuy	A	B	-0.461	0.248
2aax	A	B	-0.632	0.022
2abx	A	B	-0.386	0
2as8	A	B	-0.581	0
2bay	A	D	-0.551	0.336
2bf8	A	B	-0.500	0
2bf8	B	A	-0.448	0
2bku	A	B	-0.676	0.090
2bku	B	A	-0.692	0.017
2bqq	A	B	-0.624	0.037
3t0h	A	B	-0.635	0.075
2bzy	A	B	-0.544	0.577
2c9q	A	B	-0.397	0.159
2cjw	A	B	-0.514	0.068
2ck2	A	B	-0.320	0.091
2cmu	A	B	-0.545	0
2e85	A	B	-0.563	0.013
2owd	A	B	-0.516	0
2f8b	A	B	-0.846	0.080
2fuh	A	B	-0.431	0.010
2fuh	B	A	-0.354	0.023
2fyl	A	B	-0.242	0.297
2fyl	B	A	-0.483	0.147
2ggp	A	B	-0.636	0.243
2ggp	B	A	-0.681	0.230
2gja	A	B	-0.519	0.054
2gwh	A	B	-0.591	0.027
2h2b	A	B	-0.443	0.314
2hci	A	B	-0.692	0.112
2hip	A	B	-0.322	0
2hkn	A	B	-0.732	0.532
2ido	A	B	-0.600	0.100
2ido	B	A	-0.311	0.449
2ipr	A	B	-0.741	0.112
4ig5	A	B	-0.443	0
2ims	A	B	-0.555	0
2ipa	A	B	-0.559	0.044
2ipa	B	A	-0.341	0.054
2iqq	A	B	-0.385	0
2iyi	A	B	-0.414	0.235
2j05	A	B	-0.620	0.220
2j0n	A	B	-0.630	0.027
2j0t	A	D	-0.360	0.136
2j0t	D	A	-0.684	0.093
2jjb	A	C	-0.339	0
2w0r	A	B	-0.493	0.052
2jqr	A	B	-0.344	0.135
2jqr	B	A	-0.565	0.086
2jrl	A	B	-0.698	0.126
2k1r	A	B	-0.592	0.248
2k1r	B	A	-0.751	0.210
2k2q	A	B	-0.269	0.099
2k2q	B	A	-0.127	0.071
2k2s	A	B	-0.506	0.055
2k2s	B	A	-0.372	0.185
2k4a	A	B	-0.296	0
2k4a	B	A	-0.251	0
2k5b	A	B	-0.541	0.018
2k5b	B	A	-0.621	0.025
2k79	A	B	-0.402	0.233
2k79	B	A	-0.525	0.104
2k8c	A	B	-0.395	0.063
2k8c	B	A	-0.389	0.060
2k9f	A	B	-0.318	0.237
2k9f	B	A	-0.400	0.212
2kfk	A	B	-0.630	0.140
2kfk	B	A	-0.658	0.121
2knv	A	B	-0.320	0.121
2ktr	A	B	-0.429	0.073
2kwi	A	B	-0.501	0.028
2kwi	B	A	-0.347	0.129
2lns	A	B	-0.385	0.114
2loh	A	B	-0.610	0.420
2lrm	A	B	-0.295	0
2lz6	A	B	-0.394	0
2lz6	B	A	-0.227	0
2m56	A	B	-0.476	0.014
2m56	B	A	-0.554	0.046
2mbq	A	B	-0.474	0
2mcn	A	B	-0.563	0.148
2mcn	B	A	-0.407	0.154
2mj5	A	B	-0.617	0.170
2mj5	B	A	-0.033	0.254
2nqd	A	B	-0.361	0.105
2nqd	B	A	-0.389	0.048
4pun	A	B	-0.465	0.096
2nrf	A	B	-0.940	0.153
2nz7	A	B	-0.916	0.368
2nz5	A	B	-0.414	0
2o3b	A	B	-0.305	0
2o3b	B	A	-0.536	0
2oob	A	B	-0.624	0.000
2oob	B	A	-0.563	0.000
2ori	A	B	-0.381	0
2p23	A	B	-0.449	0
2uyz	A	B	-0.441	0.031
2uyz	B	A	-0.510	0.054
2pr8	A	B	-0.395	0
2ptt	A	B	-0.507	0
2ptt	B	A	-0.473	0
2q16	A	B	-0.480	0
2q32	A	B	-0.426	0
2qdt	A	B	-0.426	0
2qhd	A	B	-0.423	0.012
2qif	A	B	-0.762	0.192
2qyp	A	B	-1.260	0.575
2r11	A	B	-0.530	0.002
2r2o	A	B	-0.394	0.146
2rf6	A	B	-0.748	0.121
2scp	A	B	-0.546	0.043
2uzq	A	B	-0.512	0
2v6h	A	B	-0.364	0
2v9b	A	B	-0.436	0.089
2wgz	A	B	-0.554	0.011
2vl3	A	C	-0.563	0
2voc	A	B	-0.491	0.081
2vsm	A	B	-0.549	0
2vsm	B	A	-0.573	0
2vv6	A	B	-0.360	0.128
2wjd	A	B	-0.556	0.018
2wnx	A	B	-0.482	0
3gxu	A	B	-0.529	0.049
3gxu	B	A	-0.577	0.055
2wt9	A	B	-0.645	0.002
2wwx	A	B	-0.741	0.073
2wwx	B	A	-0.439	0.106
2wy8	A	Q	-0.681	0.006
2wy8	Q	A	-0.155	0.122
2x2a	A	B	-0.395	0
2x2b	A	B	-0.630	0.088
2x2n	A	C	-0.502	0
2xf1	A	B	-0.797	0.071
2xmj	A	B	-0.744	0.190
2xms	A	B	-0.613	0.050
2xol	A	B	-0.728	0
3zrd	A	B	-0.577	0.042
2xy8	A	B	-0.544	0.086
2xy8	B	A	-0.388	0.347
2y5s	A	B	-0.535	0.135
2y6w	A	B	-0.705	0.440
2ydx	A	C	-0.441	0.038
2yee	A	B	-0.576	0.014
2yem	A	B	-0.555	0.009
2ygn	A	B	-0.542	0
2z59	A	B	-0.717	0.021
2z59	B	A	-0.515	0.042
2zvx	A	B	-0.409	0
2zwm	A	B	-0.626	0.032
3ans	A	B	-0.641	0
3apt	A	B	-0.594	0
3axa	A	B	-0.484	0.041
3bri	A	B	-0.880	0.166
3cbj	A	B	-0.430	0.024
3cbj	B	A	-0.369	0.066
3cby	A	B	-0.746	0.165
3cz2	A	B	-0.649	0.234
3n7d	A	B	-0.557	0.329
3e1z	A	B	-0.351	0.019
3e1z	B	A	-0.529	0.006
3ebn	A	C	-1.088	0.602
3esb	A	B	-0.509	0.088
3exu	A	B	-0.434	0.053
2opy	A	B	-0.482	0.163
3f4a	A	B	-0.521	0.075
3fqc	A	B	-0.690	0.013
3g21	A	B	-0.559	-0.000
3frg	A	B	-0.593	0.015
3gix	A	B	-0.671	0.068
4fy0	A	B	-1.042	0.074
3gmh	A	B	-0.615	0
3gmw	A	B	-0.451	0.018
3gmw	B	A	-0.372	0.037
3gro	A	B	-0.424	0.046
3gzl	A	B	-0.607	0
4qf4	A	B	-0.271	0
4axl	A	B	-0.385	0
3hmt	A	B	-0.429	0
1eyl	A	B	-0.458	0
4k6k	A	B	-0.246	0.116
3id3	A	B	-0.423	0.232
3ifw	A	B	-0.579	0.105
3ifw	B	A	-0.689	0.262
3zc9	A	B	-0.621	0.108
3jwk	A	B	-0.684	0.026
3k9m	A	C	-0.401	0.009
3k9m	C	A	-0.445	0.020
3kh0	A	B	-0.436	0
3kjh	A	B	-0.651	0
3kse	A	D	-0.360	0
3kse	D	A	-0.413	0
3kud	A	B	-0.571	0.023
3kud	B	A	-0.554	0.052
3l4q	A	C	-0.523	0
3l4q	C	A	-0.208	0
3low	A	B	-0.884	0.817
3n3k	A	B	-0.646	0.054
3n3k	B	A	-0.722	0.231
3wui	A	B	-0.418	0.694
3nvu	A	B	-0.591	0.001
3nyd	A	B	-0.593	0
3nyj	A	B	-0.038	0.254
3oqu	A	B	-0.540	0.106
3osk	A	B	-0.596	0.157
3ou6	A	D	-0.438	0
3p1x	A	B	-0.263	0
3pc7	A	B	-0.463	0.011
3pra	A	B	-0.511	0.093
3q01	A	B	-0.360	0.182
3qw9	A	B	-0.592	0
3r0n	A	B	-0.411	0.040
3ra5	A	B	-0.734	0.032
3rap	R	S	-0.505	0
3rdx	A	B	-0.385	0.197
3rnk	A	B	-0.527	0.220
3rnk	B	A	-0.582	0.214
1os6	A	B	-0.223	0.486
3s6a	A	B	-0.509	0.098
3sx6	A	B	-0.515	0.032
3m9z	A	B	-0.753	0.322
3t5g	A	B	-0.529	0
3t5g	B	A	-0.453	0
3u15	A	B	-0.651	0
3u6g	A	B	-0.385	0
3ulh	A	B	-0.445	0.163
3ux2	A	B	-0.770	0.683
3uyj	A	B	-0.588	0.035
3uyo	A	D	-0.367	0.173
3uyo	D	A	-0.645	0.119
3v1b	A	B	-0.451	0.205
3v3x	A	C	-0.629	0.823
3v4k	A	B	-0.661	0.006
3v4m	A	B	-0.461	0.019
3vb8	A	B	-0.721	0.085
4glq	A	B	-0.628	0.023
3vym	A	B	-0.512	0.151
3wan	A	B	-0.440	0
3wym	A	B	-0.636	0
3zby	A	B	-0.412	0
3zgd	A	B	-0.429	0
3zlz	A	B	-0.507	0.106
3zu2	A	B	-0.456	0
3zy7	A	B	-0.594	0.119
4a20	A	B	-0.708	0.023
4a8z	A	B	-0.319	0
4ab0	A	B	-0.741	0.062
4afm	A	B	-0.620	0.064
4ag0	A	B	-0.641	0
1ang	A	B	-0.335	0
4afb	A	B	-0.630	0.039
4auy	A	B	-0.591	0
4aw3	A	B	-0.464	0
4ayz	A	B	-0.320	0.114
4azm	A	B	-0.640	0.669
4azo	A	B	-0.418	0
4b5o	A	B	-0.527	0
4be9	A	B	-0.534	0.084
4bex	1	A	-0.559	0.060
4bmm	A	C	-0.503	0.012
4c4n	A	B	-0.391	0
4cur	A	B	-0.488	0.077
4cxj	A	B	-0.792	0.246
4ixp	A	B	-0.708	0.043
4d6q	A	B	-0.543	0.041
4dge	A	C	-0.425	0
4dge	C	A	-0.352	0
4dj4	A	B	-0.657	0.018
4dri	A	B	-0.467	0.032
4dri	B	A	-0.566	0.033
4drj	A	B	-0.451	0
4drj	B	A	-0.530	0
4ea6	A	B	-0.597	0.039
4etw	A	B	-0.708	0.023
4etw	B	A	-0.609	0.092
4gyq	A	B	-0.434	0
4f38	A	B	-0.561	0.084
4f38	B	A	-0.404	0.112
4f44	A	B	-0.738	0.147
4f7f	A	B	-0.753	0.038
4fgd	A	C	-0.503	0.050
4ftp	A	B	-0.841	0.153
4g2b	A	B	-0.635	0.064
4g2e	A	B	-0.728	0.142
4gel	A	B	-0.743	0.085
1jk3	A	B	-0.396	0
4k7y	A	B	-0.404	0.032
4hhv	A	B	-0.414	0
4ic2	A	B	-1.193	0.188
4ikb	A	B	-0.545	0.075
4inb	A	B	-0.390	0.070
4j3y	A	C	-0.623	0.063
4jqw	A	C	-0.534	0
4jqw	C	A	-0.460	0
4k8m	A	B	-0.316	0
4kaf	A	B	-0.486	0.014
4kax	A	B	-0.744	0.092
4kax	B	A	-0.453	0.173
4lj3	A	B	-0.771	0.103
4luc	A	B	-0.502	0
4luq	A	B	-0.400	0
4m76	A	B	-0.648	0
4m76	B	A	-0.525	0
4mac	A	B	-0.584	0.054
4mfu	A	B	-0.537	0
4nxf	A	B	-0.444	0.218
4oz0	A	B	-0.564	0.057
4p93	A	B	-0.612	0.003
4pn6	A	B	-0.347	0
4p7f	A	B	-0.525	0.012
4q2l	A	B	-0.457	0.021
4q2o	A	B	-0.502	0.329
4q2q	A	B	-0.793	0.309
4qdk	A	B	-0.494	0
4uxu	A	B	-0.611	0.041
4uy2	A	C	-0.542	0.039
4uy2	C	A	-0.700	0.086
5hpg	A	B	-0.357	0
6ins	E	F	-1.772	0.142
1phz	A	B	-0.576	0.018
2p41	A	B	-0.368	0
1vpt	A	B	-0.652	0
1m9h	A	B	-0.389	0
3lsd	A	B	-0.593	0
1ert	A	B	-0.835	0.074
1job	A	B	-0.395	0
5p21	A	B	-0.545	0
2rez	A	B	-0.234	0
1qjh	A	B	-0.724	0.244
2vw8	A	B	-0.709	0.030
1z28	A	B	-0.595	0
3us4	A	B	-0.687	0.161
1mkt	A	B	-0.483	0
1j9b	A	B	-0.481	0
1n9l	A	B	-0.391	0
4ips	A	B	-0.532	0
1ycc	A	B	-0.299	0
3ip0	A	B	-0.619	0
2eh9	A	B	-0.604	0
1sk4	A	B	-0.779	0.243
1wab	A	B	-0.515	0
3by8	A	B	-0.430	0
1d06	A	B	-0.384	0.185
4kor	A	B	-0.661	0.129
1gpr	A	B	-0.411	0.035
3pn2	A	B	-0.462	0
3prt	A	B	-0.424	0
1tlk	A	B	-0.404	0
2pxr	C	A	-0.303	0
3cu9	A	B	-0.632	0
1s7d	A	B	-0.498	0.019
3l14	A	B	-0.511	0
1xe1	A	B	-0.512	0.021
1lcl	A	B	-0.525	0
1pcs	A	B	-0.427	0
3emn	X	A	-0.304	0.235
1edt	A	B	-0.593	0
3vih	A	B	-0.508	0.015
2dob	A	B	-0.817	0.062
3e5j	A	B	-0.538	0.026
3bzt	A	B	-0.915	0.176
3gpn	A	B	-0.791	0.018
1a1x	A	B	-0.457	0.000
3r68	A	B	-0.571	0.111
1amp	A	B	-0.351	0
1nxo	A	B	-0.670	0.128
4pa1	A	B	-0.535	0.099
4qew	A	B	-0.540	0.076
3gk9	A	B	-0.522	0.065
3nft	A	B	-0.456	0.002
2iim	A	B	-0.506	0.114
4hn7	A	B	-0.564	0.085
3u3n	C	A	-0.357	0
4m5q	A	B	-0.524	0.064
1cei	A	B	-0.468	0.053
4e89	A	B	-0.327	0
2aqj	A	B	-0.572	0
3mvf	A	B	-0.520	0
2hbb	A	B	-0.634	0.039
1beo	A	B	-0.695	0.112
1yea	A	B	-0.242	0.017
3svi	A	B	-0.492	0.002
3rcp	A	B	-0.335	0.001
1fjj	A	B	-0.438	0
4ew1	A	B	-0.679	0.056
1bed	A	B	-0.589	0
2h03	A	B	-0.535	0
1thw	A	B	-0.466	0
3utv	A	B	-0.877	0.098
3sny	A	B	-0.553	0
2ouj	A	B	-0.618	0.014
1fxd	A	B	-0.498	0.018
3frs	A	B	-0.668	0.043
3fai	A	B	-0.458	0.002
1qy1	A	B	-0.527	0
3bzg	A	B	-0.569	0.041
1i8o	A	B	-0.402	0.027
4pyk	A	B	-0.719	0.369
4jy8	A	B	-0.573	0.026
1lpn	A	B	-0.406	0.075
1fsc	A	B	-0.436	0
1rcb	A	B	-0.583	0
2wyq	A	B	-0.592	0.054
1bdo	A	B	-0.637	0.058
1ctf	A	B	-0.498	0.009
1ay2	A	B	-0.472	0.235
2nul	A	B	-0.532	0.088
2hm7	A	B	-0.621	0.176
1po5	A	B	-0.564	0.181
1nzn	A	B	-0.591	0.279
3e5h	A	B	-0.770	0.090
3s5d	A	B	-0.685	0.022
3k5x	A	B	-0.385	0.010
2ejx	A	B	-0.706	0.024
1thf	D	A	-0.707	0.015
2olm	A	B	-0.422	0
3ggl	A	B	-0.616	0.164
2z14	A	B	-0.621	0.124
2xyl	A	B	-0.558	0
1btn	A	B	-0.437	0
1py9	A	B	-0.304	0
1zj6	A	B	-0.729	0
1who	A	B	-0.505	0
1nlr	A	B	-0.403	0
1lfb	A	B	-0.179	0
1a6f	A	B	-0.446	0
3lmo	A	B	-0.723	0.112
3ift	A	B	-0.462	0.020
4ibr	A	B	-0.396	0
4orr	A	B	-0.374	0
2yxm	A	B	-0.508	0
1bkl	A	B	-0.526	0.052
4jz3	A	B	-0.790	0.777
4jtu	A	B	-0.397	0
2uuq	A	B	-0.448	0.044
2i5m	X	A	-0.457	0
1he9	A	B	-0.407	0.029
1qqs	A	B	-0.553	0
4hx0	A	B	-0.603	0.063
1k46	A	B	-0.492	0.476
2e6u	X	A	-0.649	0
3rlc	A	B	-0.485	0
1uat	A	B	-0.516	0
2dww	A	B	-0.376	0
4hrs	A	B	-0.790	0.708

## Sheet: Table S4
IDs				Interaction energies
DIBS ID	PDB ID	Chain ID for interactor 1	Chain ID for interactor 2	Etot/res	Eint/Etot
DI1000001	1mv0	A	B	-0.001	1.000		Etot means the total interaction energy between residue pairs at least one of which belongs to the protein in question
DI1000002	1jsp	A	B	-0.140	1.000		res marks the number of residues in the protein
DI1000003	2ruk	A	B	-0.056	1.000		Eint marks the total interaction energy between the protein and its interacting partner(s)
DI1020001	2kpl	B	A	-0.150	1.000
DI1020002	2kje	B	A	-0.365	0.723
DI1000004	2mzd	B	A	-0.268	1.000
DI1000005	2lsp	A	B	-0.364	1.000
DI1010001	2kft	B	A	-0.099	1.000
DI1000006	2lp0	B	A	-0.070	1.000
DI1000007	2asq	B	A	-0.652	1.000
DI1010002	1h3h	B	A	-0.141	1.000
DI1010003	2gs0	B	A	-0.008	1.000
DI1000008	2k8f	B	A	-0.027	1.000
DI1000009	2ly4	B	A	-0.669	0.939
DI1010004	3sv1	D	A	-0.116	1.000
DI1120001	2k2u	B	A	-0.171	1.000
DI1000010	2rol	B	A	0.093	1.000
DI1000011	2jnw	B	A	-0.249	0.631
DI1020003	1aou	P	F	-0.032	1.000
DI1000012	1tce	B	A	-0.433	1.000
DI1000013	2lto	B	A	0.018	0
DI1000014	2rqu	B	A	-0.367	1.000
DI1000015	1opi	B	A	-0.348	1.000
DI1000016	1onv	B	A	-0.617	0.913
DI1400001	1t6o	B	A	-0.809	0.809
DI1000017	2a4j	B	A	-1.166	0.908
DI1010005	2ka6	B	A	-0.467	0.841
DI1010006	1ju5	B	A	0.052	1.000
DI1010007	2ka4	B	A	-0.310	0.852
DI1000018	2x4w	B	A	0.438	0.817
DI1000019	2rpq	B	A	-0.585	1.000
DI1000020	2rny	B	A	-0.076	1.000
DI1000021	2kqs	B	A	-0.438	1.000
DI1000022	2l75	B	A	0.114	1.000
DI1100001	2lww	B	A	-0.462	0.985
DI1010008	1e91	B	A	-1.366	0.867
DI1100002	2bzw	B	A	-0.709	0.865
DI1000023	1l3e	A	B	-0.258	0.513
DI1010009	2fuu	B	A	-0.094	0.936
DI1010010	1l8c	B	A	-0.414	0.798
DI1000024	3t6r	D	B	0.586	1.000
DI1010011	2rnw	B	A	0.143	0.753
DI1010012	2puy	E	B	0.066	1.000
DI1010013	1r8u	A	B	-0.873	0.728
DI1000025	3kqi	B	A	-0.280	1.000
DI1010014	1ycq	B	A	-1.539	0.750
DI1100003	2wp2	P	A	-0.079	1.000
DI1020004	2cia	L	A	-0.332	1.000
DI1000026	4qq4	C	A	0.042	1.000
DI1010015	3diw	C	A	-0.689	0.826
DI1100004	2p2t	C	A	0.159	1.000
DI1000027	3dxc	B	A	-0.209	1.000
DI1000028	3b71	D	A	-0.551	0.767
DI1020005	4jop	C	A	-0.160	1.000
DI1000029	4hfz	B	A	-1.596	0.735
DI1010016	3dac	B	A	-1.202	0.729
DI1000030	3qzs	C	A	0.125	1.000
DI1000031	3dab	B	A	-1.398	0.715
DI1020006	3ik5	B	A	-0.715	1.000
DI2000001	5ffw	C	AB	-0.001	1.000
DI2010001	3cyy	C	AB	-0.909	1.000
DI1010017	4u68	D	A	-0.254	1.000
DI1000032	4a1g	E	A	-0.805	0.793
DI1000033	2b3g	B	A	0.225	0.477
DI1000034	1x11	C	A	-0.497	1.000
DI1000035	3ixs	B	A	-0.588	0.437
DI1020007	2kxc	B	A	-0.068	1.000
DI1000036	4bwq	B	A	0.006	0
DI1000037	4cc2	B	A	0.088	1.000
DI1000038	4lk9	B	A	0.042	0
DI1000039	3v4y	B	A	-0.151	1.000
DI1000040	1t08	C	A	0.171	0.669
DI1000041	2msr	A	B	-0.234	1.000
DI1000042	4oz1	C	B	-0.611	0.894
DI1000043	3dow	B	A	-1.829	1.000
DI1010018	3gv6	B	A	-0.583	1.000
DI1010019	2l1b	B	A	-0.171	1.000
DI1010020	3jti	B	A	-1.004	1.000
DI1010021	3gci	P	A	-1.411	1.000
DI1120002	1qnz	P	H	-0.043	0
DI1020008	3obu	B	A	0.490	1.000
DI1110001	1npq	B	A	-0.729	0.810
DI1010022	2rqg	A	B	-0.154	0.689
DI1000044	1emu	B	A	-0.299	1.000
DI1010023	1p4q	A	B	-0.452	0.817
DI1110002	1oqn	C	A	-0.248	1.000
DI1100005	2roz	A	B	0.188	0
DI1100006	1kne	P	A	-0.518	1.000
DI1100007	2lox	B	A	0.084	0.679
DI1100008	1q0w	A	B	-0.305	0.824
DI1120003	2mkr	B	A	-0.458	0.926
DI1100009	2m14	B	A	-0.163	1.000
DI2200001	3hpw	C	AB	-0.664	0.952
DI1110003	1pdq	B	A	-0.374	1.000
DI1010024	5urn	B	A	-0.168	0.474
DI1000045	2rvb	A	B	-0.291	1.000
DI1000046	2mkp	I	C	-0.848	0.760
DI1000047	2rs9	A	B	-0.026	1.000
DI1000048	4qyd	B	A	0.235	1.000
DI1000049	1th1	C	A	-0.135	0.768
DI1010025	1qz7	B	A	-0.225	1.000
DI1000050	1o9u	B	A	-1.187	0.821
DI1010026	2l12	B	A	-0.091	0.809
DI1010027	2l11	B	A	-0.005	1.000
DI1000051	4o62	D	B	0.013	1.000
DI1010028	3fdt	T	A	-0.250	1.000
DI1000052	2ybf	B	A	-0.370	0.851
DI1000053	5hjc	B	A	0.069	1.000
DI1000054	3asl	B	A	0.334	1.000
DI1100010	2jmj	P	A	0.210	1.000
DI1100011	3g7l	P	A	-0.407	1.000
DI1010029	3o7a	B	A	0.120	1.000
DI1000055	2rr4	B	A	0.095	1.000
DI1100012	3tz1	B	A	-0.684	0.940
DI1010030	2m8s	B	A	0.037	0.078
DI1010031	2ktb	A	B	0.297	0.936
DI1010032	2rnx	B	A	-0.025	0.250
DI1000056	5ffv	C	A	-0.042	1.000
DI1000057	4hcz	C	A	0.211	0.867
DI1000058	5lxh	E	A	-0.903	1.000
DI1110005	1pfb	B	A	-0.313	1.000
DI2210001	3tcj	T	AB	-0.217	0.853
DI1000059	2vnf	B	A	-0.085	1.000
DI1100013	2wp1	P	A	-0.128	1.000
DI1000060	1jgn	B	A	-0.008	0
DI1000061	5b77	B	A	-0.085	1.000
DI1020009	3nfk	C	A	-0.325	1.000
DI1000062	4qyl	E	A	0.100	1.000
DI1000063	2x04	C	A	0.299	1.000
DI1010033	2jkr	P	S	-0.793	1.000
DI1000064	2kgb	I	C	-0.275	0.667
DI1100014	2vog	B	A	-0.779	0.754
DI1000065	3uvy	B	A	-0.360	1.000
DI1000066	3uvx	B	A	0.070	1.000
DI2000002	3uw9	E	AC	-0.653	1.000
DI1000067	3uvw	B	A	-0.058	1.000
DI1000068	4kv1	C	A	-0.179	0.160
DI1000069	4gnf	C	A	0.186	1.000
DI1010034	2l1l	A	B	-0.653	0.755
DI1000070	2w84	B	A	-0.462	0.884
DI1000071	4bxu	B	A	-0.291	1.000
DI1000072	5ixf	B	A	0.139	0.995
DI1000073	2mwo	B	A	-0.281	1.000
DI1000074	2mwp	B	A	-0.423	1.000
DI1100015	2lpb	B	A	-0.362	0.913
DI1120004	2jo9	B	A	-0.277	1.000
DI1100016	2n8t	B	A	0.212	0.960
DI1000075	4jxt	B	A	0.677	0.934
DI1000076	2law	B	A	0.275	0.773
DI1110006	2k00	B	A	-0.433	0.948
DI1000077	4bd3	B	A	-0.160	0.614
DI1000078	2lvm	B	A	-0.420	1.000
DI1010035	2laj	B	A	0.373	1.000
DI1000079	2lb2	B	A	0.033	1.000
DI1000080	5j9s	B	A	-0.098	1.000
DI1000081	2ndf	B	A	-0.040	0.981
DI1000082	4tmp	B	A	0.388	0.931
DI1100017	5d7e	C	A	0.119	1.000
DI1000083	5hjb	B	A	0.459	0.935
DI1000084	5iql	B	A	0.237	1.000
DI1010036	2czy	B	A	-1.151	0.757
DI1000085	2lb1	B	A	0.129	1.000
DI1100018	2rms	B	A	-0.757	0.757
DI1010037	1s5q	A	B	-1.109	0.800
DI1100019	1s5r	A	B	-0.553	0.837
DI1010038	2l9s	A	B	-0.723	0.849
DI1120005	2g46	C	A	0.073	1.000
DI1000086	2peh	C	A	-0.586	0.911
DI2020001	2phe	C	AB	-0.167	0.991
DI2100001	3owt	C	AB	-0.613	0.789
DI2010002	2kyg	C	AB	-0.627	0.667
DI1010039	2v83	D	A	-0.171	1.000
DI1100020	2v86	E	A	-0.033	1.000
DI1100021	4iut	C	B	-0.052	1.000
DI1010040	2kwj	B	A	0.211	0.319
DI1000087	2kwn	B	A	-0.147	1.000
DI2200002	5cqx	C	AB	-0.190	0.947
DI3100001	4mbe	G	ABC	-0.532	1.000
DI3100002	4mbe	X	ABC	-1.078	1.000
DI3000001	1lqb	D	ABC	-0.318	0.812
DI3000002	2ast	D	ABC	-0.178	1.000
DI1000088	3ql9	C	A	0.072	1.000
DI1000089	2lbm	C	A	0.022	1.000
DI3000003	2j0s	T	ACD	0.099	0.502
DI1000090	1k4u	P	S	-0.208	0.565
DI2000003	3uin	D	AB	-0.436	0.659
DI2000004	3uip	D	AB	-0.394	0.703
DI1000091	3obq	B	A	-0.002	1.000
DI1020010	4eje	C	A	0.222	1.000
DI1000092	2mps	B	A	-1.074	0.846
DI1000093	3ivb	M	A	-0.140	1.000
DI1000094	1l2z	B	A	-0.089	1.000
DI1010041	3so6	Q	A	-0.797	1.000
DI1020011	1lcj	B	A	-0.042	1.000
DI1000095	2ejy	B	A	-1.387	1.000
DI1000096	2mrk	B	A	0.303	1.000
DI1000097	2ain	B	A	-0.878	1.000
DI1000098	1lf8	E	A	-1.323	1.000
DI1000099	1jh4	B	A	0.141	0.968
DI1000100	1dpu	B	A	-0.229	0.388
DI1000101	4mqv	B	A	-0.203	0.330
DI1000102	1irs	B	A	0.076	1.000
DI1000103	2yu7	B	A	-0.105	1.000
DI1000104	1qg1	I	E	0.074	0.271
DI1100022	2koh	B	A	-0.630	1.000
DI1000105	2vwf	B	A	-0.224	1.000
DI1000106	2w0z	B	A	-0.037	1.000
DI1000107	1g3f	B	A	-0.166	1.000
DI1100023	2k6q	B	A	-0.542	1.000
DI1000108	4u7y	B	A	-1.358	0.627
DI1000109	2jqk	B	A	-0.613	0.867
DI1000110	3wim	B	A	-0.714	1.000
DI1100024	2lsv	B	A	-0.343	1.000
DI1100025	2mho	B	A	-0.588	1.000
DI1000111	3ktr	B	A	0.116	0.022
DI1110007	4oaj	B	A	-0.530	1.000
DI1000112	2vzg	A	B	-1.012	0.713
DI1000113	4wzx	E	A	-1.224	0.575
DI1000114	2knh	B	A	-0.749	0.810
DI1100026	1vj6	B	A	-0.938	1.000
DI1010042	2vzi	A	B	-0.940	0.853
DI1000115	2k2r	B	A	-0.763	0.647
DI1000116	4edn	K	A	-0.879	0.786
DI2000005	3rqe	E	CD	-0.695	0.873
DI2000006	3rqf	E	AB	-0.801	0.613
DI1000117	1ow8	D	A	-1.312	0.731
DI1010043	4r32	B	A	-0.818	0.621
DI1010044	4r32	C	A	-0.874	0.696
DI1000118	1ow6	F	C	-0.955	0.785
DI1000119	3gm1	E	A	-0.850	0.879
DI1000120	3gm1	F	A	-0.825	0.840
DI2000007	3rqg	E	CD	-0.861	0.823
DI1100027	1zub	B	A	-1.187	1.000
DI1400002	3dd7	B	A	-0.817	0.847
DI1000121	5d94	B	A	-1.117	1.000
DI1010045	5cx3	E	A	-0.493	1.000
DI1000122	2kbs	B	A	-0.436	1.000
DI1000123	2jq9	B	A	-0.769	0.942
DI1000124	4a5x	C	A	-0.819	0.928
DI1100028	3vxw	B	A	-1.562	1.000
DI1120006	3bl2	C	A	-0.739	0.907
DI1110008	1ee5	B	A	0.257	0.969
DI1110009	1ejy	N	I	0.343	0.982
DI1100029	2c1t	D	B	-0.143	0.943
DI1010046	1ej4	B	A	-0.939	0.884
DI1000125	1wkw	B	A	-0.591	0.876
DI1000126	2gl7	E	D	-0.131	0.873
DI1100030	1dpj	B	A	-0.493	0.977
DI1200001	1r1r	D	A	-0.756	0.893
DI1110010	1sqk	B	A	-0.658	0.788
DI1000127	2iv8	P	A	-0.721	1.000
DI1000128	2nl9	B	A	-0.851	0.793
DI1000129	1a81	B	A	-0.081	1.000
DI1100031	1apm	I	E	-0.462	0.693
DI1200002	2ivz	E	A	0.153	0
DI1000130	2oq1	B	A	-0.172	1.000
DI1000131	1cee	B	A	-0.484	0.723
DI1010047	1g3j	B	A	-0.044	1.000
DI1100032	1i7w	B	A	-0.405	0.609
DI1010048	1j2j	B	A	-0.597	0.465
DI1100033	1rf8	B	A	-0.611	0.603
DI1020012	1xtg	B	A	-0.188	0.908
DI1000132	2auh	B	A	-0.375	0.870
DI1110011	2o8a	I	A	-0.132	1.000
DI3000004	1axc	B	ACE	-0.515	0.766
DI1000133	2os6	B	A	-0.158	1.000
DI2010003	3hsv	M	AB	0.375	1.000
DI1000134	3si5	Y	B	-1.080	0.684
DI1000135	2mjv	A	B	0.160	1.000
DI1000136	2n3a	A	B	-0.463	0.791
DI1000137	2fho	A	B	-0.387	1.000
DI1000138	2krb	B	A	-0.367	1.000
DI1200003	1qfn	B	A	-0.154	1.000
DI1100034	5cxt	B	A	-0.801	0.915
DI2010004	2k03	B	AC	0.200	0.900
DI1000139	2n55	B	A	-0.343	0.910
DI2010005	1dt7	X	AB	0.051	0
DI2010006	1mwn	X	AB	-0.851	0.777
DI3010001	2zvv	X	ACE	-0.661	0.691
DI1100035	4ons	B	A	-0.490	1.000
DI1400003	4ypi	E	A	-0.159	0.309
DI4000001	4ycu	C	ABDE	-0.268	1.000
DI1110012	2v51	F	B	-0.409	0.870
DI1000140	2odb	B	A	-0.374	1.000
DI1000141	4zjv	C	A	-0.168	0.354
DI1000142	1oby	P	A	-1.184	1.000
DI2100002	3fm7	C	AB	-0.191	1.000
DI2100003	3fm7	C	EF	0.182	1.000
DI1100036	2hmh	B	A	-0.317	1.000
DI2110001	2pg1	I	FG	-0.131	1.000
DI2110002	2pg1	I	AB	0.098	1.000
DI2010007	4a8x	B	AC	-0.593	0.492
DI1000143	3gj9	C	A	-0.398	1.000
DI2010008	1f95	C	AB	0.283	1.000
DI1010049	3hqm	C	A	0.019	1.000
DI1010050	3hql	C	A	-0.259	1.000
DI2100004	2z34	C	AB	-0.072	1.000
DI1100037	1abo	C	A	0.146	1.000
DI1000144	1mw4	B	A	0.187	0
DI1120007	2i0l	C	A	-0.402	1.000
DI1000145	2jf1	T	A	-0.266	1.000
DI2110003	1hrt	I	HL	-0.713	0.136
DI1000146	1h2k	S	A	-0.496	0.741
DI2000008	1p22	C	AB	-0.145	0.855
DI2100005	1nx1	C	AB	-1.796	0.912
DI1000147	1dev	B	A	-0.363	1.000
DI1200004	1sc5	B	A	-0.576	0.621
DI1110013	1tba	A	B	-0.835	0.532
DI1010051	1m1e	B	A	-0.294	0.020
DI1000148	1n4m	C	A	-0.542	0.883
DI1100038	2c1m	B	A	-0.248	0.924
DI2000009	1jsu	C	AB	-0.487	0.804
DI1000149	1zoq	C	A	-0.716	0.505
DI1000150	5aul	B	A	-0.345	1.000
DI2010009	1k2d	P	AB	0.215	1.000
DI2000010	1fv1	C	AB	-0.371	1.000
DI2200003	2fym	B	AC	-0.530	0.815
DI1000151	2ghq	C	A	0.510	1.000
DI1000152	2h4m	D	B	0.065	1.000
DI1000153	2jk9	B	A	0.130	0.981
DI1020013	2r7g	B	A	0.034	1.000
DI1100039	2xl2	C	A	-0.592	1.000
DI1100040	3c66	D	B	-0.810	0.830
DI1020014	4pz5	B	A	-0.344	0.944
DI1020015	1o9a	B	A	-0.469	1.000
DI1020016	1o9a	B	A	0.166	1.000
DI1000154	3nfl	E	A	-0.640	1.000
DI1210001	3iax	B	A	0.571	0.607
DI1210002	3qdr	B	A	-0.217	0.145
DI1000155	4ln2	B	A	-0.380	1.000
DI1000156	4lnp	B	A	0.135	1.000
DI1100041	4k45	B	A	-0.270	0.991
DI1000157	3d9k	Y	A	0.290	1.000
DI1000158	2e4h	B	A	-0.100	1.000
DI1000159	2mbh	B	A	-0.463	0.727
DI1010052	2n23	B	A	-0.146	0.856
DI1100042	2li5	B	A	-0.409	0.982
DI1100043	4uqt	B	A	-0.047	0.671
DI1000160	1p9d	S	U	-0.029	0.391
DI1000161	2le8	B	A	-0.093	0.870
DI1000162	2n1g	B	A	-0.501	0.860
DI3000005	1u76	B	ACE	-0.882	0.737
DI1210003	2a7u	A	B	-0.261	0.807
DI1100044	2lsj	B	A	-0.191	1.000
DI1000163	2lue	B	A	-0.651	1.000
DI1000164	2k3w	B	A	-0.502	1.000
DI1110014	3w8j	C	A	-1.122	1.000
DI1010053	3wgx	C	A	-0.454	1.000
DI1110015	1lxg	B	A	-0.211	0.503
DI1110016	1abt	B	A	-1.112	1.000
DI1000165	1a0n	A	B	-0.141	1.000
DI1020017	3wv0	X	A	0.141	1.000
DI1010054	4cgq	Q	A	-0.090	0.037
DI1000166	4cgw	C	A	-0.330	0.931
DI2000011	4cgv	F	AB	-0.402	1.000
DI1000167	2bug	B	A	-0.418	1.000
DI1120008	2i04	C	A	-0.540	1.000
DI1000168	1jwg	C	A	-1.306	1.000
DI1000169	3pkn	B	A	0.173	0.963
DI1000170	1w70	C	A	-0.083	1.000
DI1000171	2w3o	C	A	0.061	1.000
DI1000172	4wjn	B	A	-0.251	1.000
DI1100045	1ddv	B	A	-0.245	1.000
DI1100046	1uef	C	A	-0.406	1.000
DI1000173	2v3s	D	A	-1.458	1.000
DI1000174	5gmv	C	A	-1.465	1.000
DI1000175	3g2w	C	A	-0.739	1.000
DI1000176	4xek	C	A	-0.821	0.804
DI1010055	4xef	B	A	-0.714	0.926
DI1010056	4xef	C	A	-1.071	0.886
DI1020018	4jor	C	A	0.044	1.000
DI1000177	1juq	E	A	-0.944	1.000
DI1010057	5heb	B	A	-0.384	1.000
DI1010058	3ntw	B	A	-0.239	0.969
DI1410001	1sps	D	A	-0.213	1.000
DI1120009	2i0i	D	A	-0.443	1.000
DI1000178	4gvc	B	A	-0.449	0.869
DI1000179	3rdv	E	A	-0.962	0.994
DI1000180	5dpw	B	A	-0.979	1.000
DI1100047	1n5z	P	A	-0.636	0.989
DI1100048	3qgl	F	A	0.205	1.000
DI1000181	1d4t	B	A	-0.735	1.000
DI1000182	3g2u	C	A	-0.680	1.000
DI1000183	1py1	E	A	-0.851	1.000
DI1010059	2xa0	C	A	-0.895	0.789
DI1000184	4u7i	B	A	-1.340	0.670
DI1100049	3brl	C	A	0.172	1.000
DI1000185	3lny	B	A	-0.408	1.000
DI1100050	1z9o	J	D	-0.241	1.000
DI1000186	2ltv	B	A	0.086	0.282
DI1000187	2ltw	B	A	-0.001	1.000
DI1000188	2ltx	B	A	0.311	0.884
DI1000189	2lty	B	A	0.055	0.805
DI1000190	2ltz	B	A	0.344	0.709
DI1000191	2w85	B	A	-0.719	1.000
DI1010060	3va4	C	B	0.324	1.000
DI1020019	2kpz	B	A	0.277	1.000
DI1000192	4n7h	B	A	-0.020	1.000
DI1000193	2m3o	P	W	-0.214	0.851
DI1020020	2kq0	B	A	-0.112	1.000
DI2000012	5csf	C	AB	-0.260	0.893
DI2000013	5csn	C	AB	0.132	0.466
DI1000194	4h3p	B	A	-0.345	0.870
DI1000195	3gs2	B	A	-0.545	0.643
DI1000196	1i8h	A	B	0.035	0
DI1000197	1oj5	B	A	-0.559	1.000
DI1020021	2jby	B	A	-0.816	0.814
DI1000198	2a25	B	A	-0.621	1.000
DI1000199	4x3g	C	A	-0.377	1.000
DI1100051	2ez5	P	W	0.002	0
DI1000200	1xb0	G	A	-0.955	1.000
DI1000201	3d9u	B	A	-0.432	1.000
DI2000014	3uih	P	AB	0.478	1.000
DI1010061	4hsu	C	A	0.012	0
DI1000202	4gur	C	A	0.012	0
DI2110004	2jtt	C	AB	-0.561	0.586
DI1010062	2lct	B	A	0.092	0.109
DI1000203	2wjv	D	A	-0.323	0.870
DI1010063	4lx2	B	A	-0.704	0.912
DI2010010	4e05	I	HL	0.016	0
DI4100001	3qv1	G	ABCD	0.012	1.000
DI1100052	2vof	B	A	-0.914	0.830
DI1100053	2roc	B	A	-0.779	0.794
DI1100054	2rod	B	A	-0.809	0.777
DI1100055	2jm6	A	B	-0.453	1.000
DI4200001	3b1k	D	ABGH	-0.194	0.136
DI2200004	3m91	B	AC	-0.163	1.000
DI1010064	2p4r	T	A	0.056	0.472
DI1000204	2brq	C	A	-0.398	1.000
DI1000205	3d9t	C	A	-0.346	1.000
DI1010065	2e3k	R	D	0.068	1.000
DI1200005	2w9r	B	A	-0.236	1.000
DI1000206	5brm	G	A	-0.391	0.710
DI2010011	1bt6	C	AB	-0.974	0.631
DI2200005	1suy	C	AB	-0.260	0.845
DI1000207	4apo	E	A	0.273	0.902
DI1100056	4a54	B	A	-0.610	0.833
DI1000208	2nd1	B	A	-0.695	1.000
DI1020022	2nd0	B	A	-0.281	1.000
DI1000209	2ncz	B	A	-0.925	1.000
DI1020023	2n3k	B	A	-0.623	0.879
DI1110017	2bn5	B	A	-0.238	1.000
DI3010002	1bbr	F	EHL	0.138	0.203
DI1200006	5d0o	C	D	-0.261	0.824
DI2210002	1yfn	E	AB	-0.259	1.000
DI1000210	3esk	B	A	-0.146	1.000
DI1100057	2jmx	B	A	-0.042	1.000
DI1100058	2jql	B	A	0.347	1.000
DI3000006	1ca9	G	ABC	0.620	1.000
DI3020001	1czy	D	ABC	1.047	0.978
DI3000007	1czz	D	ABC	0.674	1.000
DI3000008	1d01	G	DEF	0.480	1.000
DI3000009	1d0a	G	ABC	1.456	1.000
DI2100006	4wfd	C	AB	-0.962	1.000
DI1010066	1ee4	C	A	-0.120	1.000
DI2010012	1fyr	I	AB	-0.260	1.000
DI2000015	1gwq	C	AB	-1.580	0.902
DI2000016	1h24	E	AB	-0.914	1.000
DI2000017	1h26	E	AB	-1.029	1.000
DI2000018	1h25	E	AB	-0.660	1.000
DI2000019	1h28	E	AB	-0.568	0.996
DI1100059	1jd5	B	A	-0.906	0.921
DI1100060	1jd6	B	A	-0.781	1.000
DI1100061	1jeg	B	A	-0.115	1.000
DI1100062	1k2n	P	A	-0.120	1.000
DI1100063	1k3q	B	A	0.015	1.000
DI1000211	1kkq	E	A	-0.868	0.756
DI1110018	1ky6	P	A	0.406	0.877
DI1010067	1ky7	P	A	-0.634	1.000
DI1100064	1kyu	P	A	-0.562	0.861
DI1000212	1m2z	B	A	-0.597	0.681
DI1110019	1m7e	D	A	-0.419	1.000
DI1000213	1mfg	B	A	-0.630	0.965
DI1010068	1n7f	C	A	-0.475	1.000
DI1000214	1o6l	C	A	-0.470	1.000
DI1000215	1obx	B	A	-1.677	1.000
DI1010069	1pjm	A	B	-0.016	1.000
DI1110020	1pjn	A	B	0.281	1.000
DI1120010	1q1t	A	C	0.043	1.000
DI1100065	2df6	C	A	0.034	0
DI2100007	5bs2	R	AB	-1.557	1.000
DI1200007	2n01	A	B	-0.301	0.981
DI1000216	4aif	D	A	-0.306	0.841
DI1000217	4jif	B	A	-0.522	1.000
DI1000218	4dx9	B	A	-0.554	1.000
DI2010013	2v7d	P	AB	-0.040	1.000
DI2020002	1qjb	Q	AB	-0.030	1.000
DI2000020	3ual	P	AB	-0.331	1.000
DI2000021	2c1j	C	AB	-0.230	1.000
DI3000010	1rf3	B	ACE	0.447	0.761
DI2010014	1rjk	C	AB	-1.144	0.828
DI1100066	1se0	B	A	-0.661	0.877
DI1000219	1shc	B	A	-0.335	1.000
DI1000220	2l1c	B	A	0.039	0
DI1000221	1t15	B	A	-0.276	1.000
DI1010070	4moy	B	A	-0.476	1.000
DI1100067	1ty4	C	A	-0.561	0.856
DI1010071	1utc	P	A	-0.600	0.512
DI1010072	5m5r	C	A	-1.146	1.000
DI1010073	5m5s	E	A	-1.751	1.000
DI1120011	5m5u	E	A	-1.360	1.000
DI1120012	5m5v	E	A	-1.432	1.000
DI1100068	1x2r	B	A	-0.008	1.000
DI1100069	2dyh	B	A	0.025	1.000
DI3000011	1u7b	B	ACE	-0.362	0.724
DI1020024	1yy6	B	A	0.786	1.000
DI1100070	2a0t	B	A	0.084	1.000
DI1010074	2a3z	C	A	-0.558	0.867
DI1010075	2a40	C	A	-0.506	0.829
DI1010076	2a41	C	A	-0.027	0
DI1100071	2g2l	C	A	-1.193	1.000
DI1000222	2azm	C	A	-0.418	1.000
DI1000223	3coj	I	A	0.081	1.000
DI2000022	2cch	E	AB	-0.781	0.993
DI2000023	2wh0	Q	AB	-0.141	1.000
DI2000024	3iqj	P	AB	0.293	1.000
DI2000025	3p1n	P	AB	-0.477	1.000
DI2000026	4dau	B	AC	-0.805	1.000
DI2000027	4iea	P	AB	-0.236	1.000
DI2000028	4ihl	P	AB	0.017	1.000
DI2000029	4wrq	C	AB	-0.417	0.647
DI2000030	5d2d	C	AB	-0.377	1.000
DI2000031	5d3e	C	AB	-0.180	1.000
DI2100008	3bow	C	AB	-0.313	1.000
DI2100009	3df0	C	AB	-0.423	0.892
DI1010077	3egg	C	A	-0.531	0.225
DI1100072	1s70	B	A	-0.401	0.131
DI1000224	4xpn	B	A	-0.746	1.000
DI1020025	2rkz	M	A	-0.109	1.000
DI1020026	2rkz	N	B	-1.052	0.906
DI1020027	2rky	D	A	-0.523	1.000
DI1020028	2rky	B	C	0.037	1.000
DI1020029	2rl0	E	D	-0.482	1.000
DI1020030	2rl0	L	K	0.227	1.000
DI1020031	3cal	B	A	-0.212	1.000
DI1020032	3cal	D	C	0.204	1.000
DI1010078	2d1k	C	A	-0.093	0.911
DI1110021	2v52	M	B	-0.533	0.854
DI1110022	3mn5	S	A	-0.112	1.000
DI1100073	3mn7	S	A	-0.223	1.000
DI1100074	2eu0	B	A	0.272	0.914
DI1000225	2flu	P	X	-0.103	0.018
DI1100075	2z32	B	A	0.418	0.686
DI1100076	3ade	B	A	0.064	0
DI1000226	2foj	B	A	-0.119	1.000
DI1000227	2foo	B	A	0.688	1.000
DI1020033	2h4j	D	A	-0.322	1.000
DI1000228	1xqh	B	A	0.117	1.000
DI1020034	1ma3	B	A	-0.550	1.000
DI1000229	4zzj	B	A	-0.051	1.000
DI2000032	3lw1	P	AB	-0.226	1.000
DI1000230	3tg5	B	A	-0.059	1.000
DI1000231	2fop	B	A	0.272	1.000
DI1000232	3mqr	B	A	-0.288	1.000
DI1000233	3mqs	D	C	0.330	1.000
DI1000234	2g30	P	A	-0.788	0.848
DI1110023	2vj0	Q	A	-0.784	1.000
DI1100077	2gbq	B	A	-0.254	1.000
DI1010079	2gph	B	A	-0.480	1.000
DI1000235	2gpo	C	A	-1.702	0.826
DI1000236	3cs8	B	A	-0.993	0.839
DI2000033	3h52	N	AD	-1.168	0.704
DI1000237	4h3b	B	A	-0.744	1.000
DI1100078	4loo	B	A	-0.449	0.998
DI1000238	2okr	C	A	-0.424	1.000
DI1000239	2xs0	B	A	-0.772	1.000
DI1000240	2y9q	B	A	-0.148	1.000
DI1100079	3o71	B	A	-0.274	0.831
DI1000241	2kxh	B	A	-0.506	0.568
DI1100080	2ihs	C	A	0.085	1.000
DI1010080	3f2o	C	A	0.063	1.000
DI1000242	3n5u	C	A	-1.096	1.000
DI1000243	2l8j	B	A	-0.433	1.000
DI1100081	2zpn	E	A	-2.325	1.000
DI1100082	4eoy	D	A	-0.696	1.000
DI2000034	2p1l	B	AC	-0.500	1.000
DI1100083	2voi	B	A	-0.676	0.909
DI1100084	2mow	B	A	-0.003	1.000
DI1000244	3kuj	B	A	-0.163	1.000
DI1000245	2jxc	B	A	-0.327	0.964
DI3100003	2od8	B	ACE	-0.579	0.694
DI1000246	2odd	B	A	0.198	1.000
DI1000247	3twu	B	A	-0.208	1.000
DI1000248	3uxg	B	A	-0.380	1.000
DI1010081	3v2o	B	A	-0.064	1.000
DI1000249	3v30	B	A	-0.492	1.000
DI1000250	3v31	B	A	-0.345	1.000
DI1000251	4lg6	B	A	-0.278	0.994
DI1000252	4qqi	X	A	-0.160	1.000
DI1000253	5jja	C	A	-0.074	1.000
DI1000254	3eu7	X	A	-0.539	0.775
DI1000255	3uvk	B	A	-0.107	1.000
DI1000256	3emh	B	A	-0.462	1.000
DI1000257	3uvl	B	A	0.061	0
DI1000258	3uvm	B	A	-0.367	1.000
DI1000259	3uvn	B	A	-0.206	1.000
DI1000260	3uvo	B	A	-0.260	1.000
DI1000261	4cy1	C	B	-0.304	1.000
DI1100085	4cy3	D	A	-0.530	0.824
DI1010082	5igo	U	A	0.060	0.333
DI1000262	5igq	U	A	-0.019	1.000
DI1000263	3qis	B	A	-1.127	0.851
DI1000264	4kmd	B	A	-0.478	1.000
DI1020035	4bld	E	A	-0.326	1.000
DI2000035	3bqo	B	AC	-0.279	1.000
DI2000036	3bua	E	AB	-0.819	0.705
DI1010083	3zfw	X	A	-0.932	1.000
DI1100086	2i3s	B	A	-0.751	0.661
DI1100087	2i3t	B	A	-0.700	0.483
DI1100088	2p1q	C	B	-0.605	1.000
DI1000265	2zne	C	A	0.182	1.000
DI2000037	3gjo	E	AB	0.173	1.000
DI1100089	3ml4	E	A	0.169	0.691
DI1000266	3soq	Z	A	-0.369	1.000
DI1000267	3sov	Z	A	-0.463	0.889
DI1100090	4bh6	N	E	-0.124	1.000
DI1000268	4ggd	C	A	0.477	0.889
DI2020003	4f0z	C	AB	-0.600	0.906
DI2000038	5hkh	B	AC	-1.290	0.989
DI1100091	1pq1	B	A	-0.477	0.942
DI1000269	2yq6	B	A	-1.337	0.889
DI1000270	1ozs	B	A	-0.520	0.962
DI1000271	4x34	C	A	-0.159	1.000
DI1000272	4cri	C	A	-0.337	1.000
DI1000273	2lgg	B	A	0.309	1.000
DI1000274	2mpt	B	A	-0.528	0.843
DI1020036	2ci9	L	A	-0.400	1.000
DI1100092	4z89	a	A	0.087	1.000
DI1000275	5m9n	C	A	0.153	1.000
DI1000276	5jej	C	B	-0.123	1.000
DI1000277	5jek	C	A	-0.391	0.803
DI1000278	5jel	B	A	-0.302	0.813
DI1100093	1k3n	B	A	0.195	1.000
DI1000279	3qlc	C	A	-0.031	1.000
DI1000280	4w5a	C	A	-0.036	1.000
DI2010015	4htc	I	HL	-0.715	0.168
DI2010016	1c1u	I	HL	-0.915	0.880
DI1000281	4n4f	C	A	0.232	1.000
DI1000282	3sow	C	A	0.303	0.753
DI1000283	3qzv	C	A	-0.130	1.000
DI1000284	4lka	B	A	-0.038	1.000
DI1000285	4llb	C	A	0.015	0
DI1010084	1v18	B	A	-0.177	1.000
DI1000286	3ask	P	A	0.210	0.314
DI1000287	5lxi	C	D	-1.069	1.000
DI1000288	4gng	B	A	0.197	1.000
DI1010085	2v85	D	A	0.023	1.000
DI1010086	2v88	D	A	-0.060	1.000
DI1100094	4iuv	C	A	0.040	1.000
DI1010087	2kwk	B	A	0.144	0.159
DI1000289	2kwo	B	A	0.048	0
DI1000290	1jpl	E	A	-0.785	1.000
DI1100095	4hpt	I	E	-0.456	0.673
DI1100096	1i7x	D	C	-0.226	0.542
DI1000291	2f9d	P	A	-0.393	0.914
DI2000039	2k04	B	AC	0.074	1.000
DI2010017	2k05	B	AC	0.138	0.907
DI1000292	2ght	C	A	0.690	1.000
DI1000293	3d9o	Z	B	0.569	1.000
DI1000294	3d9n	Y	A	0.391	1.000
DI1000295	4wjo	B	A	-0.251	1.000
DI1000296	2n9x	B	A	-0.282	1.000
DI1000297	4gvd	D	A	-0.616	0.905
DI1000298	1d4w	C	A	-0.680	1.000
DI1000299	3g2v	C	A	-0.602	1.000
DI1000300	1ujj	C	A	-0.909	1.000
DI1010088	2mc1	B	A	0.066	1.000
DI2000040	2c1n	C	AB	-0.067	1.000
DI1100097	3wdz	B	A	0.142	0
DI1020037	2h2d	B	A	-0.417	1.000
DI1000301	5k6s	B	A	-0.023	1.000
DI1000302	2ndg	B	A	0.222	1.000
DI1000303	4cy2	C	A	-0.911	1.000
DI1100098	4cy5	C	A	-0.724	1.000
DI1000304	1xow	B	A	-1.463	0.783
DI2000041	3uig	P	AB	-0.096	1.000
DI1100099	3ukz	C	B	-0.003	0
DI1010089	3ifq	C	A	-0.297	0.610
DI1000305	2dwx	P	A	-0.019	1.000
DI1000306	2ov2	I	A	-0.509	0.850
DI1000307	2w97	E	A	-0.965	0.851
DI1000308	4u7e	A	B	-1.041	0.558
DI1020038	3fie	C	A	-0.383	0.708
DI1200008	3gme	D	A	0.223	0.803
DI1000309	4oed	B	A	-1.909	0.739
DI1000310	5jjm	G	A	-1.749	0.886
DI1000311	2ao6	B	A	-1.290	0.732
DI1000312	3hqr	S	A	-0.527	1.000
DI1000313	3l3x	B	A	-1.183	0.731
DI1000314	3l3z	B	A	-1.150	0.725
DI1000315	1t5z	B	A	-1.175	0.774
DI1200009	3o0e	L	A	0.297	1.000
DI2020004	3mi9	C	AB	-0.929	0.161
DI1020039	3zhf	B	A	-0.317	1.000
DI3000012	4d2g	D	ABC	-0.288	0.972
DI1000316	4l67	B	A	-0.161	0.582
DI1210004	3c94	B	A	-0.355	1.000
DI1210005	3c94	C	A	-0.987	1.000
DI1200010	3q8d	E	A	-0.143	1.000
DI1200011	3uf7	B	A	-1.927	1.000
DI1200012	3uf7	C	A	0.050	1.000
DI1200013	4nl8	C	A	-0.520	1.000
DI1210006	4z0u	D	A	-0.918	1.000
DI1200014	5f56	B	A	-0.872	1.000
DI2000042	3uee	B	AC	0.036	1.000
DI1000317	4h39	B	A	-0.783	1.000
DI1000318	2y8o	B	A	0.083	1.000
DI1010090	3emw	B	A	0.241	1.000
DI1000319	3twr	E	A	0.277	0.928
DI2000043	3bu8	C	AB	-0.236	1.000
DI1000320	2lgk	B	A	0.219	1.000
DI1100100	4z88	M	A	-0.010	1.000
DI1100101	4z8a	B	A	-0.090	1.000
DI1000321	5e50	D	A	-0.413	1.000
DI1010091	4v0v	B	A	-0.508	1.000
DI1000322	3u5p	I	A	0.166	1.000
DI1000323	3u5o	I	A	0.140	1.000
DI1000324	3u5n	C	A	0.063	1.000
DI1000325	4xi7	C	A	-0.352	1.000
DI1020040	4yoz	B	A	-0.826	1.000
DI1010092	4yos	E	A	-0.182	1.000
DI2200006	3m4w	E	AC	-0.139	1.000
DI2100010	5j3t	C	AB	-0.453	1.000
DI1000326	3wa4	B	A	-0.112	1.000
DI1100102	3fp2	Q	A	-0.378	1.000
DI1010093	5mgx	A	F	-0.616	1.000
DI2000044	5wqd	H	AB	-0.290	1.000
DI1000327	5gjh	B	A	0.129	0.194
DI1000328	5gji	B	A	-0.109	1.000
DI1000329	3mxc	L	A	0.380	1.000
DI1000330	3o37	E	A	-0.022	1.000
DI1000331	5t1g	B	A	-0.436	1.000
DI1010094	2w5z	C	A	-0.098	0.897
DI1200015	4am9	B	A	-0.752	1.000
DI2200007	2xcb	C	AB	-0.970	1.000
DI2200008	3gz1	Q	AB	-0.413	1.000
DI1000332	4cqo	B	A	-0.868	0.684
DI1100103	4ue9	B	A	-0.491	0.843
DI1100104	4ue8	B	A	-0.301	1.000
DI2100011	4uec	B	AC	-0.325	0.991
DI1010095	5uwh	D	C	-1.396	0.918
DI1010096	5uwi	D	C	-0.010	0.869
DI1010097	5uwj	D	C	-2.051	0.899
DI1010098	5uwp	D	C	-1.411	0.700
DI1010099	5uwq	D	C	-1.214	0.747
DI1010100	5uws	D	C	-1.375	0.814
DI1100105	2jd5	C	B	-0.172	1.000
DI2210003	1l2w	I	AB	-0.646	0.767
DI2200009	1jyo	E	BD	-0.660	0.680
DI1210007	5czf	A	D	-0.584	0.792
DI2200010	3o6q	B	AC	-0.410	1.000
DI2200011	3kxy	T	AB	-0.722	0.839
DI2200012	4jmf	A	BC	-0.492	0.753
DI1200016	4g6t	B	A	-0.342	0.957
DI1210008	4gf3	B	A	-0.709	0.837
DI1210009	1ttw	B	A	-0.638	0.946
DI1100106	2my3	B	A	0.114	0.414
DI1100107	4bjt	D	A	-1.527	1.000
DI2100012	5a2p	E	AB	-0.794	1.000
DI1010101	2vcp	D	A	-0.390	0.787
DI1010102	3c6w	B	A	-0.087	1.000
DI1010103	1cmk	I	E	-0.429	0.676
DI1000333	2fsa	P	A	-0.380	1.000
DI1010104	2dvq	P	A	0.245	1.000
DI1000334	3lqi	R	A	-0.053	1.000
DI1000335	3lqj	Q	A	0.105	0.365
DI1020041	1jm4	A	B	0.074	1.000
DI1000336	3o34	B	A	-0.122	1.000
DI1000337	3o35	E	A	0.026	1.000
DI1000338	3o36	E	A	-0.050	1.000
DI1210010	5cw7	A	B	-0.428	0.811
DI1010105	1jlu	S	E	-0.485	0.708

## Sheet: Table S5
MFIB ID	UniProt ID	UniProt position	PDB ID	PDB chain ID	PDB position	Residue	modification
MF2100001	P01270	32	1et1	A	1	S	p
MF2100001	P01270	34	1et1	A	3	S	p
MF2100001	P01270	48	1et1	A	17	S	p
MF2200001	P05386	101	4beh	A	101	S	p
MF2200001	P05386	104	4beh	A	104	S	p
MF2200001	P05386	2	4beh	A	2	A	ac
MF2200001	P05387	102	4beh	B	302	S	p
MF2200001	P05387	105	4beh	B	305	S	p
MF2200001	P05387	17	4beh	B	217	S	p
MF2200001	P05387	19	4beh	B	219	S	p
MF2200001	P05387	1	4beh	B	201	M	ac
MF2200001	P05387	21	4beh	B	221	K	ac
MF2200001	P05387	79	4beh	B	279	S	p
MF2200001	P05387	86	4beh	B	286	S	p
MF2100002	P05387	17	2w1o	A	17	S	p
MF2100002	P05387	19	2w1o	A	19	S	p
MF2100002	P05387	1	2w1o	A	1	M	ac
MF2100002	P05387	21	2w1o	A	21	K	ac
MF2201001	Q9Y6Q9	1048	1kbh	A	4	S	p
MF2201001	Q9Y6Q9	1059	1kbh	A	15	T	p
MF2201001	Q9Y6Q9	1062	1kbh	A	18	S	p
MF2201001	Q9Y6Q9	1064	1kbh	A	20	T	p
MF2201001	Q9Y6Q9	1067	1kbh	A	23	T	p
MF2201001	P45481	2064	1kbh	B	53	S	p
MF2201001	P45481	2077	1kbh	B	66	S	p
MF2201001	P45481	2080	1kbh	B	69	S	p
MF4210001	Q62696	39	1rso	A	42	S	p
MF2201002	P45481	2064	2l14	A	2064	S	p
MF2201002	P45481	2077	2l14	A	2077	S	p
MF2201002	P45481	2080	2l14	A	2080	S	p
MF2201002	P04637	15	2l14	B	15	S	p
MF2201002	P04637	18	2l14	B	18	T	p
MF2201002	P04637	20	2l14	B	20	S	p
MF2201002	P04637	24	2l14	B	24	K	ub
MF2201002	P04637	33	2l14	B	33	S	p
MF2201002	P04637	37	2l14	B	37	S	p
MF2201002	P04637	46	2l14	B	46	S	p
MF2201002	P04637	55	2l14	B	55	T	p
MF2201003	P45481	2064	2c52	A	7	S	p
MF2201003	P45481	2077	2c52	A	20	S	p
MF2201003	P45481	2080	2c52	A	23	S	p
MF4100001	P02766	72	3a4d	A	52	S	p
MF4110001	P02767	72	1gke	A	52	S	p
MF2100003	O75496	150	1uii	A	150	Y	p
MF2100003	O75496	98	1uii	A	98	Y	p
MF2200002	O75496	150	4bry	A	150	Y	p
MF2200002	O75496	98	4bry	A	98	Y	p
MF2120011	P0AF36	10	2jee	A	10	K	ac
MF2110007	P80220	1	1dip	A	1	M	ac
MF2110007	P80220	45	1dip	A	45	S	p
MF2202001	O00401	242	2lnh	A	37	S	p
MF2202001	O00401	256	2lnh	A	51	Y	p
MF2201005	O75367	116	1u35	C	918	K	ac
MF2201005	O75367	116	1u35	C	918	K	ub
MF2201005	O75367	117	1u35	C	919	K	ub
MF2201005	O75367	18	1u35	C	820	K	me
MF2201005	Q9D2U9	109	1u35	D	1305	K	me
MF2201005	Q9D2U9	116	1u35	D	1312	T	p
MF2201005	Q9D2U9	117	1u35	D	1313	K	me
MF2201005	Q9D2U9	37	1u35	D	1233	S	p
MF2201005	Q9D2U9	47	1u35	D	1243	K	me
MF2201005	Q9D2U9	58	1u35	D	1254	K	me
MF2201005	Q9D2U9	80	1u35	D	1276	R	me
MF2201005	Q9D2U9	86	1u35	D	1282	K	ac
MF2201005	Q9D2U9	86	1u35	D	1282	K	me
MF2201005	Q9D2U9	87	1u35	D	1283	R	me
MF2201005	Q9D2U9	93	1u35	D	1289	R	me
MF2201006	O75367	116	2f8n	G	1118	K	ac
MF2201006	O75367	116	2f8n	G	1118	K	ub
MF2201006	O75367	117	2f8n	G	1119	K	ub
MF2201006	O75367	18	2f8n	G	1020	K	me
MF2211001	P0C0S6	116	1f66	C	915	K	ub
MF2200003	P0C0S5	102	3wa9	C	101	K	me
MF2200003	P06899	109	3wa9	D	108	K	me
MF2200003	P06899	116	3wa9	D	115	T	p
MF2200003	P06899	117	3wa9	D	116	K	me
MF2200003	P06899	37	3wa9	D	36	S	p
MF2200003	P06899	47	3wa9	D	46	K	me
MF2200003	P06899	58	3wa9	D	57	K	me
MF2200003	P06899	79	3wa9	D	78	S	p
MF2200003	P06899	80	3wa9	D	79	R	me
MF2200003	P06899	84	3wa9	D	83	Y	p
MF2200003	P06899	86	3wa9	D	85	K	ac
MF2200003	P06899	86	3wa9	D	85	K	me
MF2200003	P06899	87	3wa9	D	86	R	me
MF2200003	P06899	93	3wa9	D	92	R	me
MF2210001	P06897	105	1aoi	C	104	Q	me
MF2210001	P06897	6	1aoi	C	5	K	ac
MF2210002	P02263	105	2aro	A	104	Q	me
MF2201007	P33778	109	3x1u	D	108	K	me
MF2201007	P33778	116	3x1u	D	115	T	p
MF2201007	P33778	117	3x1u	D	116	K	ac
MF2201007	P33778	117	3x1u	D	116	K	me
MF2201007	P33778	121	3x1u	D	120	K	ac
MF2201007	P33778	121	3x1u	D	120	K	ub
MF2201007	P33778	126	3x1u	D	125	K	ub
MF2201007	P33778	33	3x1u	D	32	S	p
MF2201007	P33778	35	3x1u	D	34	K	ub
MF2201007	P33778	37	3x1u	D	36	S	p
MF2201007	P33778	47	3x1u	D	46	K	me
MF2201007	P33778	58	3x1u	D	57	K	me
MF2201007	P33778	79	3x1u	D	78	S	p
MF2201007	P33778	80	3x1u	D	79	R	me
MF2201007	P33778	84	3x1u	D	83	Y	p
MF2201007	P33778	86	3x1u	D	85	K	ac
MF2201007	P33778	86	3x1u	D	85	K	me
MF2201007	P33778	87	3x1u	D	86	R	me
MF2201007	P33778	93	3x1u	D	92	R	me
MF2210003	P84051	104	2nqb	C	904	Q	me
MF2210003	P02283	34	2nqb	D	1233	S	p
MF2200004	P06899	109	3waa	D	108	K	me
MF2200004	P06899	116	3waa	D	115	T	p
MF2200004	P06899	117	3waa	D	116	K	me
MF2200004	P06899	37	3waa	D	36	S	p
MF2200004	P06899	47	3waa	D	46	K	me
MF2200004	P06899	58	3waa	D	57	K	me
MF2200004	P06899	79	3waa	D	78	S	p
MF2200004	P06899	80	3waa	D	79	R	me
MF2200004	P06899	84	3waa	D	83	Y	p
MF2200004	P06899	86	3waa	D	85	K	ac
MF2200004	P06899	86	3waa	D	85	K	me
MF2200004	P06899	87	3waa	D	86	R	me
MF2200004	P06899	93	3waa	D	92	R	me
MF2200005	P68431	108	3afa	A	107	T	p
MF2200005	P68431	116	3afa	A	115	K	ac
MF2200005	P68431	123	3afa	A	122	K	ac
MF2200005	P68431	123	3afa	A	122	K	me
MF2200005	P68431	42	3afa	A	41	Y	p
MF2200005	P68431	46	3afa	A	45	T	p
MF2200005	P68431	57	3afa	A	56	K	ac
MF2200005	P68431	57	3afa	A	56	K	me
MF2200005	P68431	58	3afa	A	57	S	p
MF2200005	P68431	65	3afa	A	64	K	me
MF2200005	P68431	80	3afa	A	79	K	ac
MF2200005	P68431	80	3afa	A	79	K	me
MF2200005	P68431	80	3afa	A	79	K	ub
MF2200005	P68431	81	3afa	A	80	T	p
MF2200005	P68431	87	3afa	A	86	S	p
MF2200005	P62805	21	3afa	B	?	K	ac
MF2200005	P62805	21	3afa	B	?	K	me
MF2200005	P62805	32	3afa	B	31	K	ac
MF2200005	P62805	32	3afa	B	31	K	me
MF2200005	P62805	48	3afa	B	47	S	p
MF2200005	P62805	52	3afa	B	51	Y	p
MF2200005	P62805	56	3afa	B	55	R	me
MF2200005	P62805	73	3afa	B	72	Y	p
MF2200005	P62805	78	3afa	B	77	K	ac
MF2200005	P62805	78	3afa	B	77	K	me
MF2200005	P62805	81	3afa	B	80	T	p
MF2200005	P62805	89	3afa	B	88	Y	p
MF2200005	P62805	92	3afa	B	91	K	ac
MF2200005	P62805	92	3afa	B	91	K	ub
MF2200006	Q71DI3	108	3av1	A	107	T	p
MF2200006	Q71DI3	116	3av1	A	115	K	ac
MF2200006	Q71DI3	123	3av1	A	122	K	ac
MF2200006	Q71DI3	123	3av1	A	122	K	me
MF2200006	Q71DI3	42	3av1	A	41	Y	p
MF2200006	Q71DI3	46	3av1	A	45	T	p
MF2200006	Q71DI3	57	3av1	A	56	K	ac
MF2200006	Q71DI3	57	3av1	A	56	K	me
MF2200006	Q71DI3	58	3av1	A	57	S	p
MF2200006	Q71DI3	65	3av1	A	64	K	me
MF2200006	Q71DI3	80	3av1	A	79	K	ac
MF2200006	Q71DI3	80	3av1	A	79	K	me
MF2200006	Q71DI3	81	3av1	A	80	T	p
MF2200006	Q71DI3	87	3av1	A	86	S	p
MF2200006	P62805	21	3av1	B	?	K	ac
MF2200006	P62805	21	3av1	B	?	K	me
MF2200006	P62805	32	3av1	B	31	K	ac
MF2200006	P62805	32	3av1	B	31	K	me
MF2200006	P62805	48	3av1	B	47	S	p
MF2200006	P62805	52	3av1	B	51	Y	p
MF2200006	P62805	56	3av1	B	55	R	me
MF2200006	P62805	73	3av1	B	72	Y	p
MF2200006	P62805	78	3av1	B	77	K	ac
MF2200006	P62805	78	3av1	B	77	K	me
MF2200006	P62805	81	3av1	B	80	T	p
MF2200006	P62805	89	3av1	B	88	Y	p
MF2200006	P62805	92	3av1	B	91	K	ac
MF2200006	P62805	92	3av1	B	91	K	ub
MF2200007	Q16695	108	3a6n	A	107	T	p
MF2200007	Q16695	116	3a6n	A	115	K	ac
MF2200007	Q16695	123	3a6n	A	122	K	ac
MF2200007	Q16695	123	3a6n	A	122	K	me
MF2200007	Q16695	42	3a6n	A	41	Y	p
MF2200007	Q16695	57	3a6n	A	56	K	ac
MF2200007	Q16695	57	3a6n	A	56	K	me
MF2200007	Q16695	58	3a6n	A	57	S	p
MF2200007	Q16695	65	3a6n	A	64	K	me
MF2200007	Q16695	80	3a6n	A	79	K	ac
MF2200007	Q16695	80	3a6n	A	79	K	me
MF2200007	Q16695	81	3a6n	A	80	T	p
MF2200007	Q16695	87	3a6n	A	86	S	p
MF2200007	P62805	21	3a6n	B	?	K	ac
MF2200007	P62805	21	3a6n	B	?	K	me
MF2200007	P62805	32	3a6n	B	31	K	ac
MF2200007	P62805	32	3a6n	B	31	K	me
MF2200007	P62805	48	3a6n	B	47	S	p
MF2200007	P62805	52	3a6n	B	51	Y	p
MF2200007	P62805	56	3a6n	B	55	R	me
MF2200007	P62805	73	3a6n	B	72	Y	p
MF2200007	P62805	78	3a6n	B	77	K	ac
MF2200007	P62805	78	3a6n	B	77	K	me
MF2200007	P62805	81	3a6n	B	80	T	p
MF2200007	P62805	89	3a6n	B	88	Y	p
MF2200007	P62805	92	3a6n	B	91	K	ac
MF2200007	P62805	92	3a6n	B	91	K	ub
MF2200008	P84243	108	3av2	A	107	T	p
MF2200008	P84243	116	3av2	A	115	K	ac
MF2200008	P84243	123	3av2	A	122	K	ac
MF2200008	P84243	123	3av2	A	122	K	me
MF2200008	P84243	42	3av2	A	41	Y	p
MF2200008	P84243	46	3av2	A	45	T	p
MF2200008	P84243	57	3av2	A	56	K	ac
MF2200008	P84243	57	3av2	A	56	K	me
MF2200008	P84243	58	3av2	A	57	S	p
MF2200008	P84243	65	3av2	A	64	K	me
MF2200008	P84243	80	3av2	A	79	K	ac
MF2200008	P84243	80	3av2	A	79	K	me
MF2200008	P84243	81	3av2	A	80	T	p
MF2200008	P84243	87	3av2	A	86	S	p
MF2200008	P62805	21	3av2	B	?	K	ac
MF2200008	P62805	21	3av2	B	?	K	me
MF2200008	P62805	32	3av2	B	31	K	ac
MF2200008	P62805	32	3av2	B	31	K	me
MF2200008	P62805	48	3av2	B	47	S	p
MF2200008	P62805	52	3av2	B	51	Y	p
MF2200008	P62805	56	3av2	B	55	R	me
MF2200008	P62805	73	3av2	B	72	Y	p
MF2200008	P62805	78	3av2	B	77	K	ac
MF2200008	P62805	78	3av2	B	77	K	me
MF2200008	P62805	81	3av2	B	80	T	p
MF2200008	P62805	89	3av2	B	88	Y	p
MF2200008	P62805	92	3av2	B	91	K	ac
MF2200008	P62805	92	3av2	B	91	K	ub
MF2210004	P02299	80	2nqb	A	479	K	me
MF2210004	P84040	81	2nqb	B	80	T	p
MF2210004	P84040	83	2nqb	B	82	T	p
MF2210005	P61830	57	1id3	A	56	K	ac
MF2210005	P61830	65	1id3	A	64	K	ac
MF2210005	P61830	80	1id3	A	79	K	me
MF2210005	P02309	61	1id3	B	60	S	p
MF2210005	P02309	65	1id3	B	64	S	p
MF2210005	P02309	80	1id3	B	79	K	ac
MF2202002	P42768	291	2k42	A	53	Y	p
MF2201008	P28033	239	1ci6	B	239	S	p
MF2201008	P28033	276	1ci6	B	276	S	p
MF3300001	P06400	841	2aze	C	841	T	p
MF3300001	P06400	855	2aze	C	855	S	p
MF3300001	P06400	860	2aze	C	860	K	me
MF4100003	P04637	333	2j0z	A	333	R	me
MF4100003	P04637	335	2j0z	A	335	R	me
MF4100003	P04637	337	2j0z	A	337	R	me
MF4100005	O15350	388	2kby	A	38	S	p
MF4410001	P60881	28	1n7s	C	28	S	p
MF4410001	P60881	29	1n7s	C	29	T	p
MF4410001	P60881	154	1n7s	D	154	S	p
MF4410001	P60881	187	1n7s	D	187	S	p
MF4400001	Q9BV40	18	4wy4	A	18	S	p
MF4400001	Q9BV40	28	4wy4	A	28	T	p
MF4400001	Q9BV40	48	4wy4	A	48	T	p
MF4400001	Q9BV40	54	4wy4	A	54	T	p
MF4400001	Q9BV40	55	4wy4	A	55	S	p
MF4400001	O95721	114	4wy4	C	114	S	p
MF4400001	O95721	77	4wy4	C	77	S	p
MF4400001	O95721	78	4wy4	C	78	S	p
MF4400001	O95721	204	4wy4	D	204	S	p
MF4400001	O95721	210	4wy4	D	210	S	p
MF4411001	G3V7P1	218	2nps	B	218	S	p
MF4411001	G3V7P1	225	2nps	B	225	S	p
MF4411002	Q9WUF4	17	1gl2	A	17	S	p
MF4411002	Q9WUF4	27	1gl2	A	27	T	p
MF4411002	Q9WUF4	47	1gl2	A	47	T	p
MF4411002	Q9WUF4	53	1gl2	A	53	T	p
MF4411002	Q9WUF4	54	1gl2	A	54	S	p
MF4411002	O70439	205	1gl2	B	205	S	p
MF4411002	Q9Z2Q7	160	1gl2	D	160	S	p
MF4411003	Q9WU70	1132	1urq	A	1096	S	p
MF4411003	P60881	28	1urq	C	28	S	p
MF4411003	P60881	29	1urq	C	29	T	p
MF4411003	P60881	154	1urq	D	153	S	p
MF4411003	P60881	187	1urq	D	186	S	p
MF4210003	P60881	28	1jth	A	28	S	p
MF4210003	P60881	29	1jth	A	29	T	p
MF2200010	P49450	124	3nqj	A	124	K	ub
MF2200010	P49450	68	3nqj	A	68	S	p
MF2200010	P62805	21	3nqj	B	?	K	ac
MF2200010	P62805	21	3nqj	B	?	K	me
MF2200010	P62805	32	3nqj	B	31	K	ac
MF2200010	P62805	32	3nqj	B	31	K	me
MF2200010	P62805	48	3nqj	B	47	S	p
MF2200010	P62805	52	3nqj	B	51	Y	p
MF2200010	P62805	56	3nqj	B	55	R	me
MF2200010	P62805	73	3nqj	B	72	Y	p
MF2200010	P62805	78	3nqj	B	77	K	ac
MF2200010	P62805	78	3nqj	B	77	K	me
MF2200010	P62805	81	3nqj	B	80	T	p
MF2200010	P62805	89	3nqj	B	88	Y	p
MF2200010	P62805	92	3nqj	B	91	K	ac
MF2200010	P62805	92	3nqj	B	91	K	ub
MF2100009	P61244	40	1r05	A	20	K	ac
MF2100009	P61244	66	1r05	A	46	K	ac
MF2100010	Q14469	37	2mh3	A	37	S	p
MF2100010	Q14469	38	2mh3	A	38	S	p
MF2100011	Q02535	48	2lfh	A	33	Y	p
MF2100012	P08263	2	1k3y	A	2	A	ac
MF2100013	P04271	2	1uwo	A	1	S	ac
MF2110017	P80031	125	2gsr	A	125	K	ac
MF2110017	P80031	3	2gsr	A	3	Y	p
MF2110017	P80031	59	2gsr	A	59	T	p
MF2100014	P00441	103	2c9v	A	102	S	p
MF2100014	P00441	106	2c9v	A	105	S	p
MF2100014	P00441	108	2c9v	A	107	S	p
MF2100014	P00441	123	2c9v	A	122	K	ac
MF2100014	P00441	137	2c9v	A	136	K	ac
MF2100014	P00441	2	2c9v	A	1	A	ac
MF2100014	P00441	71	2c9v	A	70	K	ac
MF2100014	P00441	76	2c9v	A	75	K	sum
MF2100014	P00441	99	2c9v	A	98	S	p
MF2110019	P80147	252	1ohv	A	224	K	ac
MF2110019	P80147	279	1ohv	A	251	K	ac
MF2110019	P80147	318	1ohv	A	290	K	ac
MF2110019	P80147	413	1ohv	A	385	K	ac
MF2110019	P80147	452	1ohv	A	424	K	ac
MF2110019	P80147	470	1ohv	A	442	K	ac
MF2110020	Q5KR49	108	2b9c	A	108	T	p
MF2110020	Q5KR49	174	2b9c	A	174	S	p
MF2110020	Q5KR49	186	2b9c	A	186	S	p
MF2110020	Q5KR49	206	2b9c	A	206	S	p
MF2110020	Q5KR49	215	2b9c	A	?	S	p
MF3100003	P08670	168	4ypc	A	168	K	ac
MF3100003	P08670	188	4ypc	A	188	K	ac
MF3100003	P08670	214	4ypc	A	214	S	p
MF3100003	P08670	223	4ypc	A	223	K	ac
MF3100003	P08670	226	4ypc	A	226	S	p
MF3100003	P08670	235	4ypc	A	235	K	ac
MF2100015	P08670	144	3ssu	A	144	S	p
MF2100015	P08670	168	3ssu	A	168	K	ac
MF2100015	P08670	188	3ssu	A	188	K	ac
MF2100016	Q14258	273	4cfg	A	?	K	ac
MF2100016	Q14258	278	4cfg	A	278	Y	p
MF4200001	Q9UHD2	716	5eof	C	716	S	p
MF4200002	O15350	388	2nb1	B	132	S	p
MF2200012	P51825	750	2lm0	A	750	S	p
MF2200012	P51825	755	2lm0	A	755	T	p
MF2200013	Q9HC52	332	2n4q	A	332	S	p
MF2200014	Q8TEK3	900	2mv7	B	900	T	p
MF2110025	P04268	1	1ic2	A	1	M	ac
MF2110026	P63004	53	1uuj	A	53	K	ac
MF2100017	Q15691	206	1wu9	A	206	T	p
MF2100017	Q15691	220	1wu9	A	220	K	ac
MF2100017	Q15691	247	1wu9	A	247	Y	p
MF2210015	P04912	106	4kud	C	105	Q	me
MF2200015	Q96QV6	105	5gt0	C	104	Q	me
MF2200015	P62807	109	5gt0	D	108	K	me
MF2200015	P62807	116	5gt0	D	115	T	p
MF2200015	P62807	117	5gt0	D	116	K	me
MF2200015	P62807	33	5gt0	D	32	S	p
MF2200015	P62807	37	5gt0	D	36	S	p
MF2200015	P62807	47	5gt0	D	46	K	me
MF2200015	P62807	58	5gt0	D	57	K	me
MF2200015	P62807	79	5gt0	D	78	S	p
MF2200015	P62807	80	5gt0	D	79	R	me
MF2200015	P62807	84	5gt0	D	83	Y	p
MF2200015	P62807	86	5gt0	D	85	K	ac
MF2200015	P62807	86	5gt0	D	85	K	me
MF2200015	P62807	87	5gt0	D	86	R	me
MF2200015	P62807	93	5gt0	D	92	R	me
MF2200016	P20671	105	5gt3	C	104	Q	me
MF2200016	Q96A08	110	5gt3	D	108	K	me
MF2200016	Q96A08	117	5gt3	D	115	T	p
MF2200016	Q96A08	118	5gt3	D	116	K	me
MF2200016	Q96A08	38	5gt3	D	36	S	p
MF2200016	Q96A08	48	5gt3	D	46	K	me
MF2200016	Q96A08	59	5gt3	D	57	K	me
MF2200016	Q96A08	81	5gt3	D	79	R	me
MF2200016	Q96A08	86	5gt3	D	84	S	p
MF2200016	Q96A08	87	5gt3	D	85	K	ac
MF2200016	Q96A08	87	5gt3	D	85	K	me
MF2200016	Q96A08	88	5gt3	D	86	R	me
MF2200016	Q96A08	94	5gt3	D	92	R	me
MF2200017	Q6NXT2	107	4z5t	A	106	T	p
MF2200017	Q6NXT2	115	4z5t	A	114	K	ac
MF2200017	Q6NXT2	122	4z5t	A	121	K	ac
MF2200017	Q6NXT2	122	4z5t	A	121	K	me
MF2200017	Q6NXT2	41	4z5t	A	40	Y	p
MF2200017	Q6NXT2	56	4z5t	A	55	K	ac
MF2200017	Q6NXT2	56	4z5t	A	55	K	me
MF2200017	Q6NXT2	57	4z5t	A	56	S	p
MF2200017	Q6NXT2	64	4z5t	A	63	K	me
MF2200017	Q6NXT2	80	4z5t	A	79	T	p
MF2200017	Q6NXT2	86	4z5t	A	85	S	p
MF2200017	P62805	21	4z5t	B	20	K	ac
MF2200017	P62805	21	4z5t	B	20	K	me
MF2200017	P62805	32	4z5t	B	31	K	ac
MF2200017	P62805	32	4z5t	B	31	K	me
MF2200017	P62805	48	4z5t	B	47	S	p
MF2200017	P62805	52	4z5t	B	51	Y	p
MF2200017	P62805	56	4z5t	B	55	R	me
MF2200017	P62805	73	4z5t	B	72	Y	p
MF2200017	P62805	78	4z5t	B	77	K	ac
MF2200017	P62805	78	4z5t	B	77	K	me
MF2200017	P62805	81	4z5t	B	80	T	p
MF2200017	P62805	89	4z5t	B	88	Y	p
MF2200017	P62805	92	4z5t	B	91	K	ac
MF2200017	P62805	92	4z5t	B	91	K	ub
MF2100018	P31431	179	1ejp	A	9	S	p
MF2100018	P31431	180	1ejp	A	10	Y	p
MF2100018	P31431	197	1ejp	A	27	Y	p
MF2211003	Q03071	2	1hv2	A	2	S	ac
MF2211003	Q03071	2	1hv2	A	2	S	p
MF2200018	P01730	433	1q68	A	408	S	p
MF2200018	P01730	440	1q68	A	415	S	p
MF2200018	P01730	456	1q68	A	431	S	p

## Sheet: Table S6
UniProt ID	Boundaries of binding region	Isoform UniProt ID	Fraction of binding region present in the isoform	Number of residues from the binding region not present in the isoform	Number of residues from the canonical sequence not present in the isoform	Fraction of deleted sequence region belonging to the binding region
Q8N2Z9	14-106	Q8N2Z9-3	0.597826	38	70	0.536232
Q8N2Z9	14-106	Q8N2Z9-2	0.847826	15	41	0.35
Q9UNL4	2-105	Q9UNL4-3	0.757282	26	26	1
Q9H3D4	396-455	Q9H3D4-6	0.898305	7	337	0.0178571
Q9H3D4	396-455	Q9H3D4-5	0.898305	7	229	0.0263158
P49450	59-140	P49450-2	0.679012	27	27	1
Q06S87	20-138	Q06S87-2	0.805085	24	44	0.534884
P31007	1-97	P31007-9	0.0520833	92	145	0.631944
P31007	1-97	P31007-3	0	97	219	0.440367
P31007	1-97	P31007-4	0	97	498	0.193159
P31007	1-97	P31007-5	0	97	207	0.466019
Q8NI35	9-67	Q8NI35-5	0	59	706	0.0822695
Q96CV9	26-103	Q96CV9-3	0.597403	32	58	0.54386
P31431	171-198	P31431-2	0	28	51	0.54
P60881	1-83	P60881-2	0.926829	7	10	0.666667
A8MT69	8-81	A8MT69-2	0.753425	19	19	1
A8MT69	8-81	A8MT69-3	0.643836	27	27	1
P04637	13-61	P04637-9	0	49	193	0.25
P04637	13-61	P04637-8	0	49	194	0.248705
P04637	13-61	P04637-7	0	49	133	0.363636
P04637	13-61	P04637-6	0.458333	27	100	0.262626
P04637	13-61	P04637-5	0.458333	27	101	0.26
P04637	13-61	P04637-4	0.458333	27	40	0.666667
Q71UI9	1-128	Q71UI9-3	0.700787	39	39	1
Q71UI9	1-128	Q71UI9-2	0.84252	21	21	1
Q71UI9	1-128	Q71UI9-5	0.511811	63	63	1
Q71UI9	1-128	Q71UI9-4	0.795276	27	28	0.962963
P61244	21-107	P61244-4	0.895349	10	60	0.152542
P61244	21-107	P61244-5	0.453488	48	101	0.47
P61244	21-107	P61244-6	0.44186	49	102	0.475248
P61244	21-107	P61244-3	0.895349	10	63	0.145161
P05386	1-114	P05386-2	0.778761	26	26	1
P04268	1-81	P04268-2	0.675	27	50	0.530612
P04268	1-81	P04268-6	0.1125	72	91	0.788889
P04637	326-356	P04637-9	0.233333	24	193	0.119792
P04637	326-356	P04637-8	0.2	25	194	0.124352
P04637	326-356	P04637-6	0.233333	24	100	0.232323
P04637	326-356	P04637-5	0.2	25	101	0.24
P04637	326-356	P04637-3	0.233333	24	61	0.383333
P04637	326-356	P04637-2	0.2	25	62	0.393443
Q63ZW7	4-65	Q63ZW7-4	0	62	1274	0.0479183
Q63ZW7	4-65	Q63ZW7-3	0	62	1231	0.0495935
Q63ZW7	4-65	Q63ZW7-2	0	62	574	0.106457
P22303	575-614	P22303-2	0.025641	39	40	0.974359
P22303	575-614	P22303-4	0.025641	39	40	0.974359
Q13563	832-895	Q13563-4	0	64	335	0.188623
Q13563	832-895	Q13563-5	0.857143	10	95	0.0957447
Q13563	832-895	Q13563-2	0	64	493	0.128049

## Sheet: Table S7
MFIB ID	PBD ID with chain ID	PBD chain ID	Number of structures with competitive binding	PDB IDs of competitive binding structures
MF2201001	1kbh	A	0	-
MF2201001	1kbh	B	2	2c52,2l14
MF2201003	2c52	A	2	1kbh,2l14
MF2201003	2c52	B	0	-
MF2201002	2l14	A	2	2c52,1kbh
MF2201002	2l14	B	2	2gs0,2ly4
MF2201005	1u35	C	0	-
MF2201005	1u35	D	2	5b1l,5b1m
MF2201004	1zl8	A	0	-
MF2201004	1zl8	B	0	-
MF2201007	3x1u	C	1	3x1t
MF2201007	3x1u	D	1	3x1s
MF2201006	2f8n	G	1	1u35
MF2201006	2f8n	H	10	1p3k,1m1a,1p3o,3tu4,1p3m,5oy7,3ut9,3b6f,3lz1,1p3p
MF2201009	1b8m	A	1	1bnd
MF2201009	1b8m	B	1	1hcf
MF2201008	1ci6	A	0	-
MF2201008	1ci6	B	0	-
MF2130001	1bfm	A	0	-
MF2100010	2mh3	A	0	-
MF2202001	2lnh	A	0	-
MF2202001	2lnh	C	0	-
MF2202002	2k42	A	0	-
MF2202002	2k42	B	0	-
MF2210008	3v9r	A	0	-
MF2210008	3v9r	B	0	-
MF2100014	2c9v	A	0	-
MF2130002	1mkh	A	0	-
MF2100016	4cfg	A	0	-
MF2100017	1wu9	A	0	-
MF2210003	2nqb	C	0	-
MF2210003	2nqb	D	0	-
MF2210002	2aro	A	1	2xql
MF2210002	2aro	B	0	-
MF2210001	1aoi	C	2	3c1c,3c1b
MF2210001	1aoi	D	5	5oy7,1f66,4r8p,2f8n,3mvd
MF2210007	3b0b	A	0	-
MF2210007	3b0b	D	0	-
MF2210006	2yfw	A	0	-
MF2210006	2yfw	B	0	-
MF2210005	1id3	A	0	-
MF2210005	1id3	B	0	-
MF2210004	2nqb	A	0	-
MF2210004	2nqb	B	0	-
MF3100003	4ypc	A	0	-
MF6110001	1npk	A	0	-
MF2210010	1kj1	A	0	-
MF2210010	1kj1	D	0	-
MF2210011	5d5g	A	0	-
MF2210011	5d5g	B	0	-
MF2120009	3hnw	A	0	-
MF2120008	3wrp	A	0	-
MF2120005	3frw	A	0	-
MF2120004	1p94	A	0	-
MF2120007	1ay9	A	0	-
MF2120006	2cpg	A	0	-
MF2120001	2an7	A	0	-
MF2120003	2k1o	A	0	-
MF2120002	1x93	A	0	-
MF2200018	1q68	A	0	-
MF2200018	1q68	B	1	1q69
MF2200011	4ne3	A	0	-
MF2200011	4ne3	B	0	-
MF4410002	3b5n	A	0	-
MF4410002	3b5n	B	0	-
MF4410002	3b5n	C	0	-
MF4410002	3b5n	D	0	-
MF4410001	1n7s	A	0	-
MF4410001	1n7s	B	6	4jeu,5kj7,1urq,4jeh,3c98,5kj8
MF4410001	1n7s	C	5	5low,5lob,1urq,5kj8,5kj7
MF4410001	1n7s	D	5	5low,5lob,1urq,5kj8,5kj7
MF2200012	2lm0	A	0	-
MF2200012	2lm0	B	0	-
MF2200015	5gt0	C	1	5gsu
MF2200015	5gt0	D	1	5kgf
MF2200014	2mv7	A	1	2n4q
MF2200014	2mv7	B	0	-
MF2200017	4z5t	A	0	-
MF2200017	4z5t	B	10	5cpj,4h9o,3x1u,2cv5,3nqu,5gtc,3aze,3azk,3azi,3azm
MF4200001	5eof	A	0	-
MF4200001	5eof	C	1	5ep6
MF2140009	1dbd	A	0	-
MF2140008	2aye	A	0	-
MF2140003	1gvp	A	0	-
MF2140002	2b9d	A	0	-
MF2140001	1arq	A	0	-
MF2140007	1dhm	A	0	-
MF2140006	1f9f	A	0	-
MF2140005	1r8p	A	0	-
MF2140004	1no4	A	0	-
MF4100005	2kby	A	0	-
MF4100004	3zy1	A	0	-
MF4100001	3a4d	A	0	-
MF4100003	2j0z	A	0	-
MF4100002	1k1f	A	0	-
MF2210009	3b0c	T	0	-
MF2210009	3b0c	W	0	-
MF2100013	1uwo	A	0	-
MF2120018	3kor	A	0	-
MF2120019	1cmb	A	0	-
MF2120016	2odk	A	0	-
MF2120017	3g1c	A	0	-
MF2120014	2ijk	A	0	-
MF2120015	3hry	A	0	-
MF2120012	2mmv	A	0	-
MF2120013	4q14	A	0	-
MF2120010	4p1m	A	0	-
MF2120011	2jee	A	0	-
MF4201002	1vf6	A	0	-
MF4201002	1vf6	C	0	-
MF4201001	1y76	A	0	-
MF4201001	1y76	B	0	-
MF2200009	1bnd	A	1	1b8m
MF2200009	1bnd	B	1	3buk
MF2200002	4bry	A	1	2wvr
MF2200002	4bry	B	0	-
MF2200003	3wa9	C	2	1f66,5chl
MF2200003	3wa9	D	10	3an2,4z5t,5b0y,5b0z,3wtp,3av1,3a6n,5gtc,5x7x,5b40
MF2200001	4beh	A	0	-
MF2200001	4beh	B	0	-
MF2200006	3av1	A	0	-
MF2200006	3av1	B	10	5cpj,4h9o,4z5t,3x1u,2cv5,3nqu,5gtc,3azk,3azi,3azm
MF2200007	3a6n	A	0	-
MF2200007	3a6n	B	10	5cpj,4h9o,4z5t,3x1u,2cv5,3nqu,5gtc,3azk,3azi,3azm
MF2200004	3waa	C	0	-
MF2200004	3waa	D	10	5cpj,5jrg,4z5t,3w97,5gtc,3aze,3azk,3azi,5b40,3azm
MF2200005	3afa	A	0	-
MF2200005	3afa	B	10	4h9o,4h9n,3nqu,3av1,3nqj,5bnx,4h9r,5b32,4h9p,4h9q
MF6120001	4x19	A	0	-
MF2100018	1ejp	A	0	-
MF2210015	4kud	C	1	4jjn
MF2210015	4kud	D	0	-
MF2140014	3l32	A	0	-
MF2140015	1r6r	A	0	-
MF2140010	3hs2	A	0	-
MF2140011	1mnt	A	0	-
MF2140012	1vcq	A	0	-
MF2140013	1pd3	A	0	-
MF2110019	1ohv	A	0	-
MF2110018	4wr4	A	0	-
MF2110015	3a0e	A	0	-
MF2110014	3dzw	A	0	-
MF2110017	2gsr	A	0	-
MF2110016	1ygt	A	0	-
MF2110011	4efv	A	0	-
MF2110010	1bet	A	0	-
MF2110013	4h3o	A	0	-
MF2110012	1jb6	A	0	-
MF2120023	2hjd	A	0	-
MF2120022	1rfy	A	0	-
MF2120021	2lhk	A	0	-
MF2120020	1ety	A	0	-
MF2120027	2adl	A	0	-
MF2120026	1cz3	A	0	-
MF2120025	1pzq	A	0	-
MF2120024	3g5o	A	0	-
MF2120029	2yal	A	0	-
MF2120028	3ssi	A	0	-
MF2211001	1f66	C	8	4nft,3wa9,4cay,5b31,5fug,5b32,5b33,5chl
MF2211001	1f66	D	10	1p3k,1m1a,1p3o,3tu4,1p3m,5oy7,3ut9,3b6f,3lz1,1p3p
MF2211002	1a93	A	0	-
MF2211002	1a93	B	0	-
MF2211003	1hv2	A	0	-
MF2211003	1hv2	B	0	-
MF2100012	1k3y	A	0	-
MF5110001	1fbm	A	0	-
MF5110002	1mz9	A	0	-
MF2110008	4u5t	A	0	-
MF2110009	2oqq	A	0	-
MF2110006	1jun	A	0	-
MF2110007	1dip	A	0	-
MF2110004	1d7m	A	0	-
MF2110005	3a7o	A	0	-
MF2110002	1hbw	A	0	-
MF2110003	2q6q	A	0	-
MF2110001	1uix	A	0	-
MF2120034	4me7	E	0	-
MF2120030	2k29	A	0	-
MF2120031	3kz5	B	0	-
MF2120032	3m1e	A	0	-
MF2120033	2ay0	A	0	-
MF3300001	2aze	A	2	5tuu,5tuv
MF3300001	2aze	B	0	-
MF3300001	2aze	C	0	-
MF3120001	1jcc	A	0	-
MF3120002	2ba2	A	0	-
MF2200008	3av2	A	0	-
MF2200008	3av2	B	10	3ayw,5cpj,4z5t,2cv5,5gtc,3aze,3azk,3azi,3wa9,3w97
MF4200002	2nb1	A	0	-
MF4200002	2nb1	B	0	-
MF4210001	1rso	A	0	-
MF4210001	1rso	B	0	-
MF4210003	1jth	A	2	5low,5lob
MF4210003	1jth	B	7	3rk2,3rk3,1kil,3rl0,4jeh,3c98,2n1t
MF4210002	1y74	A	0	-
MF4210002	1y74	B	0	-
MF2100011	2lfh	A	0	-
MF2210012	2d04	A	0	-
MF2210012	2d04	B	0	-
MF4400001	4wy4	A	0	-
MF4400001	4wy4	B	0	-
MF4400001	4wy4	C	0	-
MF4400001	4wy4	D	0	-
MF4120007	2rh2	A	0	-
MF4120006	1t3u	A	0	-
MF4120005	2g2n	A	0	-
MF4120004	3qva	A	0	-
MF4120003	2h0e	A	0	-
MF4120002	2gpz	A	0	-
MF4120001	3cto	A	0	-
MF2210013	3mez	A	0	-
MF2210013	3mez	B	0	-
MF4110004	2b1f	A	0	-
MF4110005	1tfp	A	0	-
MF4110006	3vp8	A	0	-
MF4110007	4d1l	C	0	-
MF4110001	1gke	A	0	-
MF4110002	1oo2	A	0	-
MF4110003	2h1x	A	0	-
MF3110001	1aq5	A	0	-
MF4110008	2rp4	A	0	-
MF4110009	2mw4	A	0	-
MF2110024	4rp3	A	0	-
MF2110025	1ic2	A	0	-
MF2110026	1uuj	A	0	-
MF2110027	1b2p	A	0	-
MF2110020	2b9c	A	0	-
MF2110021	4aya	A	0	-
MF2110022	4ec7	A	0	-
MF2110023	4ath	A	0	-
MF2110028	2ezw	A	0	-
MF2110029	5fiy	A	0	-
MF4411001	2nps	A	0	-
MF4411001	2nps	B	0	-
MF4411001	2nps	C	0	-
MF4411001	2nps	D	0	-
MF4411002	1gl2	A	0	-
MF4411002	1gl2	B	0	-
MF4411002	1gl2	C	0	-
MF4411002	1gl2	D	0	-
MF4411003	1urq	A	0	-
MF4411003	1urq	B	10	3ipd,5ccg,5cci,5cch,1kil,3rk2,3rl0,1sfc,3rk3,3j99
MF4411003	1urq	C	10	3ipd,5w5c,5ccg,5w5d,5cci,5cch,3j97,1sfc,3j98,3j99
MF4411003	1urq	D	10	5w5c,3ipd,5lob,5ccg,5w5d,5cci,5cch,3j97,1sfc,3j99
MF6240001	1g2c	A	0	-
MF6240001	1g2c	B	0	-
MF2200016	5gt3	C	0	-
MF2200016	5gt3	D	2	5gsu,3wkj
MF4130001	1fe6	A	0	-
MF2100015	3ssu	A	0	-
MF6140001	1zv8	A	0	-
MF2200010	3nqj	A	0	-
MF2200010	3nqj	B	10	3ayw,5cpj,4h9o,4z5t,3x1u,2cv5,5gtc,3aze,3azk,3azi
MF2200013	2n4q	A	0	-
MF2200013	2n4q	B	1	2mv7
MF3100002	1wt6	A	0	-
MF2220001	1xou	A	0	-
MF2220001	1xou	B	0	-
MF2220002	4w4k	A	0	-
MF2220002	4w4k	B	0	-
MF3100001	1m7l	A	0	-
MF3100004	3hrn	A	0	-
MF2100009	1r05	A	0	-
MF2100008	1b98	A	0	-
MF2100007	1b8k	A	0	-
MF2100006	2k6s	A	0	-
MF2100005	4afl	A	0	-
MF2100004	1q2h	A	0	-
MF2100003	1uii	A	0	-
MF2100002	2w1o	A	0	-
MF2100001	1et1	A	0	-
MF4140001	3f6n	A	0	-
MF4140003	4bhv	A	0	-
MF4140002	1qey	A	0	-
MF4140005	1zv7	A	0	-
MF4140004	1sfk	A	0	-
MF5200001	1vzj	A	3	2x8b,4bdt,1f8u
MF5200001	1vzj	I	0	-
MF3140002	2fxp	A	0	-
MF3140001	1aa0	A	0	-
MF6100001	3ci9	A	0	-
MF2210014	1krl	A	0	-
MF2210014	1krl	B	0	-

## Sheet: Table S8
MFIB ID	Complex type	GeneOntology ID	GneOntology term name	Localization type
MF4100001	1	GO:0060205	cytoplasmic vesicle lumen	other
MF4100001	1	GO:0030141	secretory granule	other
MF4100001	1	GO:0005764	lysosome	other
MF4100001	1	GO:1903561	extracellular vesicle	Extracellular
MF4110001	1	GO:1903561	extracellular vesicle	Extracellular
MF4120002	1	GO:0042597	periplasmic space	Extracellular
MF4120005	1	GO:0042597	periplasmic space	Extracellular
MF2120019	1	GO:0005829	cytosol	Intracellular
MF2100012	1	GO:0005829	cytosol	Intracellular
MF2100012	1	GO:1903561	extracellular vesicle	Extracellular
MF2110017	1	GO:0005739	mitochondrion	other
MF6110001	1	GO:0043228	non-membrane-bounded organelle	other
MF6110001	1	GO:0005856	cytoskeleton	Intracellular
MF6110001	1	GO:0005886	plasma membrane	Membrane
MF6110001	1	GO:0030141	secretory granule	other
MF2110019	1	GO:0005739	mitochondrion	other
MF2110019	1	GO:0005829	cytosol	Intracellular
MF2140005	1	GO:0018995	host	Extracellular
MF2140006	1	GO:0018995	host	Extracellular
MF2140007	1	GO:0018995	host	Extracellular
MF2140008	1	GO:0018995	host	Extracellular
MF2140009	1	GO:0018995	host	Extracellular
MF2110010	1	GO:0005783	endoplasmic reticulum	other
MF2100008	1	GO:0005783	endoplasmic reticulum	other
MF2110016	1	GO:0005856	cytoskeleton	Intracellular
MF2110016	1	GO:0043228	non-membrane-bounded organelle	other
MF2110016	1	GO:0042995	cell projection	Intracellular
MF2100014	1	GO:0005654	nucleoplasm	Nucleus
MF2100014	1	GO:0005739	mitochondrion	other
MF2100014	1	GO:0031975	envelope	Extracellular
MF2100014	1	GO:0005764	lysosome	other
MF2100014	1	GO:0005829	cytosol	Intracellular
MF2100014	1	GO:0030141	secretory granule	other
MF2100014	1	GO:0031012	extracellular matrix	Extracellular
MF2100014	1	GO:0042995	cell projection	Intracellular
MF2100014	1	GO:1903561	extracellular vesicle	Extracellular
MF2140012	1	GO:0016021	integral component of membrane	Membrane
MF2140012	1	GO:0019012	virion	Extracellular
MF2140012	1	GO:0018995	host	Extracellular
MF3120001	2	GO:0031975	envelope	Extracellular
MF4130001	2	GO:0016021	integral component of membrane	Membrane
MF5110001	2	GO:0031012	extracellular matrix	Extracellular
MF5110002	2	GO:0031012	extracellular matrix	Extracellular
MF5110002	2	GO:1903561	extracellular vesicle	Extracellular
MF6100001	2	GO:0005654	nucleoplasm	Nucleus
MF6100001	2	GO:0005856	cytoskeleton	Intracellular
MF6100001	2	GO:0043228	non-membrane-bounded organelle	other
MF2110012	2	GO:0042995	cell projection	Intracellular
MF2110012	2	GO:0005667	transcription factor complex	Nucleus
MF4410002	2	GO:0005886	plasma membrane	Membrane
MF4410002	2	GO:0016021	integral component of membrane	Membrane
MF6240001	2	GO:0016021	integral component of membrane	Membrane
MF6240001	2	GO:0019012	virion	Extracellular
MF6240001	2	GO:0018995	host	Extracellular
MF6140001	2	GO:0016021	integral component of membrane	Membrane
MF6140001	2	GO:0019012	virion	Extracellular
MF6140001	2	GO:0018995	host	Extracellular
MF4140005	2	GO:0016021	integral component of membrane	Membrane
MF4140005	2	GO:0019012	virion	Extracellular
MF4140005	2	GO:0018995	host	Extracellular
MF2110001	2	GO:0005856	cytoskeleton	Intracellular
MF2110001	2	GO:0043228	non-membrane-bounded organelle	other
MF2110001	2	GO:0005829	cytosol	Intracellular
MF2110001	2	GO:0005886	plasma membrane	Membrane
MF2100003	2	GO:0005654	nucleoplasm	Nucleus
MF2100003	2	GO:0005829	cytosol	Intracellular
MF2110003	2	GO:0005856	cytoskeleton	Intracellular
MF2110003	2	GO:0043228	non-membrane-bounded organelle	other
MF2200002	2	GO:0005654	nucleoplasm	Nucleus
MF2110004	2	GO:0005856	cytoskeleton	Intracellular
MF2110004	2	GO:0043228	non-membrane-bounded organelle	other
MF2110004	2	GO:0005829	cytosol	Intracellular
MF2110004	2	GO:0005886	plasma membrane	Membrane
MF2120011	2	GO:0005829	cytosol	Intracellular
MF3100002	2	GO:0031090	organelle membrane	Membrane
MF3100002	2	GO:0031975	envelope	Extracellular
MF3100002	2	GO:0005739	mitochondrion	other
MF3100002	2	GO:0005783	endoplasmic reticulum	other
MF3100002	2	GO:0005829	cytosol	Intracellular
MF3100002	2	GO:0005886	plasma membrane	Membrane
MF3100002	2	GO:0016021	integral component of membrane	Membrane
MF2140004	2	GO:0019012	virion	Extracellular
MF4110004	2	GO:0000785	chromatin	Nucleus
MF4110004	2	GO:0005694	chromosome	Nucleus
MF4110004	2	GO:0043228	non-membrane-bounded organelle	other
MF4110004	2	GO:0005667	transcription factor complex	Nucleus
MF2110009	2	GO:0032993	protein-DNA complex	Nucleus
MF2211002	2	GO:0005654	nucleoplasm	Nucleus
MF2201008	2	GO:0005654	nucleoplasm	Nucleus
MF2201008	2	GO:0043228	non-membrane-bounded organelle	other
MF2201008	2	GO:0005667	transcription factor complex	Nucleus
MF2100006	2	GO:0005654	nucleoplasm	Nucleus
MF2100006	2	GO:0005886	plasma membrane	Membrane
MF2100006	2	GO:0031090	organelle membrane	Membrane
MF4410001	2	GO:0005886	plasma membrane	Membrane
MF4410001	2	GO:0030054	cell junction	Extracellular
MF4410001	2	GO:0042995	cell projection	Intracellular
MF4410001	2	GO:0016021	integral component of membrane	Membrane
MF4410001	2	GO:0005856	cytoskeleton	Intracellular
MF4410001	2	GO:0043228	non-membrane-bounded organelle	other
MF4410001	2	GO:0030133	transport vesicle	other
MF4410001	2	GO:0030141	secretory granule	other
MF4410001	2	GO:0031090	organelle membrane	Membrane
MF4400001	2	GO:0031090	organelle membrane	Membrane
MF4400001	2	GO:0005829	cytosol	Intracellular
MF4400001	2	GO:0005886	plasma membrane	Membrane
MF4400001	2	GO:0016021	integral component of membrane	Membrane
MF4400001	2	GO:0005764	lysosome	other
MF4400001	2	GO:0030141	secretory granule	other
MF4411001	2	GO:0030133	transport vesicle	other
MF4411001	2	GO:0016021	integral component of membrane	Membrane
MF4411001	2	GO:0031090	organelle membrane	Membrane
MF4411002	2	GO:0005764	lysosome	other
MF4411002	2	GO:0031090	organelle membrane	Membrane
MF4411002	2	GO:0016021	integral component of membrane	Membrane
MF4411002	2	GO:0005886	plasma membrane	Membrane
MF4411002	2	GO:0005829	cytosol	Intracellular
MF4411003	2	GO:0005829	cytosol	Intracellular
MF4411003	2	GO:0005886	plasma membrane	Membrane
MF4411003	2	GO:0030054	cell junction	Extracellular
MF4411003	2	GO:0016021	integral component of membrane	Membrane
MF4411003	2	GO:0030133	transport vesicle	other
MF4411003	2	GO:0030141	secretory granule	other
MF4411003	2	GO:0031090	organelle membrane	Membrane
MF4411003	2	GO:0042995	cell projection	Intracellular
MF4411003	2	GO:0005856	cytoskeleton	Intracellular
MF4411003	2	GO:0043228	non-membrane-bounded organelle	other
MF4210003	2	GO:0005886	plasma membrane	Membrane
MF4210003	2	GO:0030054	cell junction	Extracellular
MF4210003	2	GO:0042995	cell projection	Intracellular
MF4210003	2	GO:0016021	integral component of membrane	Membrane
MF4210003	2	GO:0005856	cytoskeleton	Intracellular
MF4210003	2	GO:0043228	non-membrane-bounded organelle	other
MF2110020	2	GO:0005856	cytoskeleton	Intracellular
MF2110020	2	GO:0043228	non-membrane-bounded organelle	other
MF3100003	2	GO:0005829	cytosol	Intracellular
MF3100003	2	GO:0005856	cytoskeleton	Intracellular
MF3100003	2	GO:0043228	non-membrane-bounded organelle	other
MF3100003	2	GO:0005886	plasma membrane	Membrane
MF3100003	2	GO:0030054	cell junction	Extracellular
MF3100003	2	GO:0031012	extracellular matrix	Extracellular
MF3100003	2	GO:0042995	cell projection	Intracellular
MF3100003	2	GO:1903561	extracellular vesicle	Extracellular
MF2100015	2	GO:0005829	cytosol	Intracellular
MF2100015	2	GO:0005856	cytoskeleton	Intracellular
MF2100015	2	GO:0043228	non-membrane-bounded organelle	other
MF2100015	2	GO:0005886	plasma membrane	Membrane
MF2100015	2	GO:0030054	cell junction	Extracellular
MF2100015	2	GO:0031012	extracellular matrix	Extracellular
MF2100015	2	GO:0042995	cell projection	Intracellular
MF2100015	2	GO:1903561	extracellular vesicle	Extracellular
MF2100016	2	GO:0005654	nucleoplasm	Nucleus
MF2100016	2	GO:0005829	cytosol	Intracellular
MF4200001	2	GO:0005829	cytosol	Intracellular
MF4200001	2	GO:0031090	organelle membrane	Membrane
MF2110025	2	GO:0005856	cytoskeleton	Intracellular
MF2110025	2	GO:0043228	non-membrane-bounded organelle	other
MF2110025	2	GO:0005886	plasma membrane	Membrane
MF2110029	2	GO:0042995	cell projection	Intracellular
MF2120006	3	GO:0032993	protein-DNA complex	Nucleus
MF2120004	3	GO:0032993	protein-DNA complex	Nucleus
MF4100003	3	GO:0000785	chromatin	Nucleus
MF4100003	3	GO:0005694	chromosome	Nucleus
MF4100003	3	GO:0043228	non-membrane-bounded organelle	other
MF4100003	3	GO:0005654	nucleoplasm	Nucleus
MF4100003	3	GO:0005739	mitochondrion	other
MF4100003	3	GO:0005783	endoplasmic reticulum	other
MF4100003	3	GO:0005829	cytosol	Intracellular
MF4110009	3	GO:0000785	chromatin	Nucleus
MF4110009	3	GO:0005694	chromosome	Nucleus
MF4110009	3	GO:0043228	non-membrane-bounded organelle	other
MF4110009	3	GO:0005667	transcription factor complex	Nucleus
MF4110009	3	GO:0005829	cytosol	Intracellular
MF4100005	3	GO:0000785	chromatin	Nucleus
MF4100005	3	GO:0005694	chromosome	Nucleus
MF4100005	3	GO:0043228	non-membrane-bounded organelle	other
MF4100005	3	GO:0005654	nucleoplasm	Nucleus
MF4100005	3	GO:0005667	transcription factor complex	Nucleus
MF4100005	3	GO:0005739	mitochondrion	other
MF4100005	3	GO:0005829	cytosol	Intracellular
MF4100005	3	GO:0030054	cell junction	Extracellular
MF2120020	3	GO:0032993	protein-DNA complex	Nucleus
MF2120020	3	GO:0044815	DNA packaging complex	Nucleus
MF2120020	3	GO:0000785	chromatin	Nucleus
MF2120020	3	GO:0005694	chromosome	Nucleus
MF2120020	3	GO:0043228	non-membrane-bounded organelle	other
MF2120020	3	GO:0005829	cytosol	Intracellular
MF2140010	3	GO:0032993	protein-DNA complex	Nucleus
MF2120033	3	GO:0005886	plasma membrane	Membrane
MF3300001	3	GO:0005654	nucleoplasm	Nucleus
MF3300001	3	GO:0005667	transcription factor complex	Nucleus
MF3300001	3	GO:0005739	mitochondrion	other
MF3300001	3	GO:0000785	chromatin	Nucleus
MF3300001	3	GO:0005694	chromosome	Nucleus
MF3300001	3	GO:0043228	non-membrane-bounded organelle	other
MF3300001	3	GO:0005856	cytoskeleton	Intracellular
MF2201002	4	GO:0000785	chromatin	Nucleus
MF2201002	4	GO:0005694	chromosome	Nucleus
MF2201002	4	GO:0043228	non-membrane-bounded organelle	other
MF2201002	4	GO:0005654	nucleoplasm	Nucleus
MF2201003	4	GO:0000785	chromatin	Nucleus
MF2201003	4	GO:0005694	chromosome	Nucleus
MF2201003	4	GO:0043228	non-membrane-bounded organelle	other
MF2201003	4	GO:0005654	nucleoplasm	Nucleus
MF4201001	4	GO:0005886	plasma membrane	Membrane
MF4201001	4	GO:0030054	cell junction	Extracellular
MF4201001	4	GO:1903561	extracellular vesicle	Extracellular
MF4201002	4	GO:0005886	plasma membrane	Membrane
MF4201002	4	GO:0030054	cell junction	Extracellular
MF4201002	4	GO:1903561	extracellular vesicle	Extracellular
MF2100005	4	GO:0005654	nucleoplasm	Nucleus
MF2100010	4	GO:0005654	nucleoplasm	Nucleus
MF2100013	4	GO:0042995	cell projection	Intracellular
MF2140013	4	GO:0005654	nucleoplasm	Nucleus
MF2140013	4	GO:0005829	cytosol	Intracellular
MF2140013	4	GO:0019012	virion	Extracellular
MF2140013	4	GO:0031090	organelle membrane	Membrane
MF2140013	4	GO:0018995	host	Extracellular
MF2110026	4	GO:0043228	non-membrane-bounded organelle	other
MF2110026	4	GO:0005856	cytoskeleton	Intracellular
MF2110026	4	GO:0005694	chromosome	Nucleus
MF2110026	4	GO:0031975	envelope	Extracellular
MF2110026	4	GO:0005829	cytosol	Intracellular
MF2110026	4	GO:0042995	cell projection	Intracellular
MF2110026	4	GO:0031090	organelle membrane	Membrane
MF2110026	4	GO:1903561	extracellular vesicle	Extracellular
MF2200001	4	GO:0005829	cytosol	Intracellular
MF2200001	4	GO:0043228	non-membrane-bounded organelle	other
MF2200001	4	GO:0030054	cell junction	Extracellular
MF2200001	4	GO:1903561	extracellular vesicle	Extracellular
MF2140015	4	GO:0016021	integral component of membrane	Membrane
MF2140015	4	GO:0019012	virion	Extracellular
MF2140015	4	GO:0018995	host	Extracellular
MF2110021	4	GO:0005829	cytosol	Intracellular
MF2211003	4	GO:0005829	cytosol	Intracellular
MF2211003	4	GO:0005654	nucleoplasm	Nucleus
MF2140014	4	GO:0019012	virion	Extracellular
MF2140014	4	GO:0018995	host	Extracellular
MF2200012	4	GO:0005654	nucleoplasm	Nucleus
MF2100002	5	GO:0005829	cytosol	Intracellular
MF2100002	5	GO:0043228	non-membrane-bounded organelle	other
MF2100002	5	GO:0030054	cell junction	Extracellular
MF2100002	5	GO:1903561	extracellular vesicle	Extracellular
MF4210002	5	GO:0005886	plasma membrane	Membrane
MF4210002	5	GO:0030054	cell junction	Extracellular
MF2201005	5	GO:0032993	protein-DNA complex	Nucleus
MF2201005	5	GO:0044815	DNA packaging complex	Nucleus
MF2201005	5	GO:0000785	chromatin	Nucleus
MF2201005	5	GO:0005694	chromosome	Nucleus
MF2201005	5	GO:0043228	non-membrane-bounded organelle	other
MF2201005	5	GO:1903561	extracellular vesicle	Extracellular
MF2201006	5	GO:0032993	protein-DNA complex	Nucleus
MF2201006	5	GO:0044815	DNA packaging complex	Nucleus
MF2201006	5	GO:0000785	chromatin	Nucleus
MF2201006	5	GO:0005694	chromosome	Nucleus
MF2201006	5	GO:0043228	non-membrane-bounded organelle	other
MF2211001	5	GO:0032993	protein-DNA complex	Nucleus
MF2211001	5	GO:0044815	DNA packaging complex	Nucleus
MF2211001	5	GO:0000785	chromatin	Nucleus
MF2211001	5	GO:0005694	chromosome	Nucleus
MF2211001	5	GO:0043228	non-membrane-bounded organelle	other
MF2200003	5	GO:0032993	protein-DNA complex	Nucleus
MF2200003	5	GO:0044815	DNA packaging complex	Nucleus
MF2200003	5	GO:0000785	chromatin	Nucleus
MF2200003	5	GO:0005694	chromosome	Nucleus
MF2200003	5	GO:0043228	non-membrane-bounded organelle	other
MF2210001	5	GO:0032993	protein-DNA complex	Nucleus
MF2210001	5	GO:0044815	DNA packaging complex	Nucleus
MF2210001	5	GO:0000785	chromatin	Nucleus
MF2210001	5	GO:0005694	chromosome	Nucleus
MF2210001	5	GO:0043228	non-membrane-bounded organelle	other
MF2210002	5	GO:0032993	protein-DNA complex	Nucleus
MF2210002	5	GO:0044815	DNA packaging complex	Nucleus
MF2210002	5	GO:0000785	chromatin	Nucleus
MF2210002	5	GO:0005694	chromosome	Nucleus
MF2210002	5	GO:0043228	non-membrane-bounded organelle	other
MF2201007	5	GO:0032993	protein-DNA complex	Nucleus
MF2201007	5	GO:0044815	DNA packaging complex	Nucleus
MF2201007	5	GO:0000785	chromatin	Nucleus
MF2201007	5	GO:0005694	chromosome	Nucleus
MF2201007	5	GO:0043228	non-membrane-bounded organelle	other
MF2210003	5	GO:0032993	protein-DNA complex	Nucleus
MF2210003	5	GO:0044815	DNA packaging complex	Nucleus
MF2210003	5	GO:0000785	chromatin	Nucleus
MF2210003	5	GO:0005694	chromosome	Nucleus
MF2210003	5	GO:0043228	non-membrane-bounded organelle	other
MF2200004	5	GO:0032993	protein-DNA complex	Nucleus
MF2200004	5	GO:0044815	DNA packaging complex	Nucleus
MF2200004	5	GO:0000785	chromatin	Nucleus
MF2200004	5	GO:0005694	chromosome	Nucleus
MF2200004	5	GO:0043228	non-membrane-bounded organelle	other
MF2200005	5	GO:0005694	chromosome	Nucleus
MF2200005	5	GO:0043228	non-membrane-bounded organelle	other
MF2200005	5	GO:0032993	protein-DNA complex	Nucleus
MF2200005	5	GO:0044815	DNA packaging complex	Nucleus
MF2200005	5	GO:0000785	chromatin	Nucleus
MF2200005	5	GO:0005654	nucleoplasm	Nucleus
MF2200005	5	GO:1903561	extracellular vesicle	Extracellular
MF2200006	5	GO:0032993	protein-DNA complex	Nucleus
MF2200006	5	GO:0044815	DNA packaging complex	Nucleus
MF2200006	5	GO:0000785	chromatin	Nucleus
MF2200006	5	GO:0005694	chromosome	Nucleus
MF2200006	5	GO:0043228	non-membrane-bounded organelle	other
MF2200006	5	GO:0005654	nucleoplasm	Nucleus
MF2200006	5	GO:1903561	extracellular vesicle	Extracellular
MF2200007	5	GO:0032993	protein-DNA complex	Nucleus
MF2200007	5	GO:0044815	DNA packaging complex	Nucleus
MF2200007	5	GO:0000785	chromatin	Nucleus
MF2200007	5	GO:0005694	chromosome	Nucleus
MF2200007	5	GO:0043228	non-membrane-bounded organelle	other
MF2200007	5	GO:0005654	nucleoplasm	Nucleus
MF2200007	5	GO:1903561	extracellular vesicle	Extracellular
MF2200008	5	GO:0005694	chromosome	Nucleus
MF2200008	5	GO:0043228	non-membrane-bounded organelle	other
MF2200008	5	GO:0032993	protein-DNA complex	Nucleus
MF2200008	5	GO:0044815	DNA packaging complex	Nucleus
MF2200008	5	GO:0000785	chromatin	Nucleus
MF2200008	5	GO:0005654	nucleoplasm	Nucleus
MF2200008	5	GO:1903561	extracellular vesicle	Extracellular
MF2210004	5	GO:0032993	protein-DNA complex	Nucleus
MF2210004	5	GO:0044815	DNA packaging complex	Nucleus
MF2210004	5	GO:0000785	chromatin	Nucleus
MF2210004	5	GO:0005694	chromosome	Nucleus
MF2210004	5	GO:0043228	non-membrane-bounded organelle	other
MF2210005	5	GO:0032993	protein-DNA complex	Nucleus
MF2210005	5	GO:0044815	DNA packaging complex	Nucleus
MF2210005	5	GO:0000785	chromatin	Nucleus
MF2210005	5	GO:0005694	chromosome	Nucleus
MF2210005	5	GO:0043228	non-membrane-bounded organelle	other
MF2200010	5	GO:0032993	protein-DNA complex	Nucleus
MF2200010	5	GO:0044815	DNA packaging complex	Nucleus
MF2200010	5	GO:0000785	chromatin	Nucleus
MF2200010	5	GO:0005694	chromosome	Nucleus
MF2200010	5	GO:0043228	non-membrane-bounded organelle	other
MF2200010	5	GO:0005654	nucleoplasm	Nucleus
MF2210006	5	GO:0032993	protein-DNA complex	Nucleus
MF2210006	5	GO:0044815	DNA packaging complex	Nucleus
MF2210006	5	GO:0000785	chromatin	Nucleus
MF2210006	5	GO:0005694	chromosome	Nucleus
MF2210006	5	GO:0043228	non-membrane-bounded organelle	other
MF2210008	5	GO:0005654	nucleoplasm	Nucleus
MF2210009	5	GO:0005694	chromosome	Nucleus
MF2210009	5	GO:0043228	non-membrane-bounded organelle	other
MF2130001	5	GO:0005694	chromosome	Nucleus
MF2130001	5	GO:0043228	non-membrane-bounded organelle	other
MF2120030	5	GO:0032993	protein-DNA complex	Nucleus
MF2200014	5	GO:0005654	nucleoplasm	Nucleus
MF3140002	5	GO:0016021	integral component of membrane	Membrane
MF3140002	5	GO:0019012	virion	Extracellular
MF3140002	5	GO:0018995	host	Extracellular
MF2110028	5	GO:0005886	plasma membrane	Membrane
MF4140004	5	GO:0016021	integral component of membrane	Membrane
MF4140004	5	GO:0019012	virion	Extracellular
MF4140004	5	GO:0018995	host	Extracellular
MF2210015	5	GO:0032993	protein-DNA complex	Nucleus
MF2210015	5	GO:0044815	DNA packaging complex	Nucleus
MF2210015	5	GO:0000785	chromatin	Nucleus
MF2210015	5	GO:0005694	chromosome	Nucleus
MF2210015	5	GO:0043228	non-membrane-bounded organelle	other
MF2200015	5	GO:0032993	protein-DNA complex	Nucleus
MF2200015	5	GO:0044815	DNA packaging complex	Nucleus
MF2200015	5	GO:0000785	chromatin	Nucleus
MF2200015	5	GO:0005694	chromosome	Nucleus
MF2200015	5	GO:0043228	non-membrane-bounded organelle	other
MF2200015	5	GO:1903561	extracellular vesicle	Extracellular
MF2200016	5	GO:0032993	protein-DNA complex	Nucleus
MF2200016	5	GO:0044815	DNA packaging complex	Nucleus
MF2200016	5	GO:0000785	chromatin	Nucleus
MF2200016	5	GO:0005694	chromosome	Nucleus
MF2200016	5	GO:0043228	non-membrane-bounded organelle	other
MF2200017	5	GO:0032993	protein-DNA complex	Nucleus
MF2200017	5	GO:0044815	DNA packaging complex	Nucleus
MF2200017	5	GO:0000785	chromatin	Nucleus
MF2200017	5	GO:0005694	chromosome	Nucleus
MF2200017	5	GO:0043228	non-membrane-bounded organelle	other
MF2201001	6	GO:0000785	chromatin	Nucleus
MF2201001	6	GO:0005694	chromosome	Nucleus
MF2201001	6	GO:0043228	non-membrane-bounded organelle	other
MF2201001	6	GO:0005654	nucleoplasm	Nucleus
MF3110001	6	GO:0031012	extracellular matrix	Extracellular
MF3100001	6	GO:0031012	extracellular matrix	Extracellular
MF3100001	6	GO:0005764	lysosome	other
MF3100001	6	GO:0005783	endoplasmic reticulum	other
MF3100001	6	GO:0030141	secretory granule	other
MF4210001	6	GO:0005829	cytosol	Intracellular
MF4210001	6	GO:0005886	plasma membrane	Membrane
MF4210001	6	GO:0042995	cell projection	Intracellular
MF2200011	6	GO:0005694	chromosome	Nucleus
MF2200011	6	GO:0043228	non-membrane-bounded organelle	other
MF2200011	6	GO:0005654	nucleoplasm	Nucleus
MF2210007	6	GO:0005694	chromosome	Nucleus
MF2210007	6	GO:0043228	non-membrane-bounded organelle	other
MF2210007	6	GO:0005654	nucleoplasm	Nucleus
MF2100009	6	GO:0005654	nucleoplasm	Nucleus
MF2100009	6	GO:0042995	cell projection	Intracellular
MF2100009	6	GO:0032993	protein-DNA complex	Nucleus
MF2100009	6	GO:0005667	transcription factor complex	Nucleus
MF2110024	6	GO:0005856	cytoskeleton	Intracellular
MF2110024	6	GO:0043228	non-membrane-bounded organelle	other
MF2110024	6	GO:0005886	plasma membrane	Membrane
MF2110024	6	GO:0030054	cell junction	Extracellular
MF2110024	6	GO:0042995	cell projection	Intracellular
MF2200018	6	GO:0005886	plasma membrane	Membrane
MF2100004	6	GO:0005829	cytosol	Intracellular
MF2100004	6	GO:0005886	plasma membrane	Membrane
MF4100002	6	GO:0005829	cytosol	Intracellular
MF4100002	6	GO:0005886	plasma membrane	Membrane
MF4100002	6	GO:0030054	cell junction	Extracellular
MF4100002	6	GO:1903561	extracellular vesicle	Extracellular
MF4100004	6	GO:0000785	chromatin	Nucleus
MF4100004	6	GO:0005694	chromosome	Nucleus
MF4100004	6	GO:0043228	non-membrane-bounded organelle	other
MF4100004	6	GO:0005654	nucleoplasm	Nucleus
MF4100004	6	GO:0005667	transcription factor complex	Nucleus
MF4100004	6	GO:0005739	mitochondrion	other
MF4100004	6	GO:0005783	endoplasmic reticulum	other
MF4100004	6	GO:0005829	cytosol	Intracellular
MF4100004	6	GO:0042995	cell projection	Intracellular
MF4200002	6	GO:0005654	nucleoplasm	Nucleus
MF4200002	6	GO:0005667	transcription factor complex	Nucleus
MF4200002	6	GO:0005739	mitochondrion	other
MF4200002	6	GO:0005829	cytosol	Intracellular
MF4200002	6	GO:0000785	chromatin	Nucleus
MF4200002	6	GO:0005694	chromosome	Nucleus
MF4200002	6	GO:0043228	non-membrane-bounded organelle	other
MF3100004	6	GO:0005783	endoplasmic reticulum	other
MF3100004	6	GO:0005886	plasma membrane	Membrane
MF3100004	6	GO:0016021	integral component of membrane	Membrane
MF3100004	6	GO:0030054	cell junction	Extracellular
MF3100004	6	GO:0042995	cell projection	Intracellular
MF3100004	6	GO:0031090	organelle membrane	Membrane
MF3100004	6	GO:0005856	cytoskeleton	Intracellular
MF3100004	6	GO:0043228	non-membrane-bounded organelle	other
MF3100004	6	GO:1903561	extracellular vesicle	Extracellular
MF2100017	6	GO:0005856	cytoskeleton	Intracellular
MF2100017	6	GO:0043228	non-membrane-bounded organelle	other
MF2100017	6	GO:0005829	cytosol	Intracellular
MF2100017	6	GO:0005886	plasma membrane	Membrane
MF2100017	6	GO:0042995	cell projection	Intracellular
MF3140001	6	GO:0019012	virion	Extracellular
MF2140002	6	GO:0018995	host	Extracellular
MF2200013	6	GO:0005654	nucleoplasm	Nucleus

## Sheet: Table S9
MFIB ID	MFIB type	CATH classification
MF2140008	1	3.30.70.330
MF2110013	1	2.90.10.10
MF2201009	1	2.10.90.10
MF2100014	1	2.60.40.200
MF2120028	1	3.30.350.10
MF2120026	1	3.40.430.10
MF2100012	1	3.40.30.10
MF2140007	1	3.30.70.330
MF2140006	1	3.30.70.330
MF2210011	1	2.90.10.10
MF4120005	1	2.60.40.180
MF2100007	1	2.10.90.10
MF2100008	1	2.10.90.10
MF2130002	1	2.40.50.140
MF2110019	1	3.90.1150.10
MF2110018	1	3.40.30.10
MF4100001	1	2.60.40.180
MF2140005	1	3.30.70.330
MF2210012	1	2.90.10.10
MF2110011	1	2.10.90.10
MF4110005	1	2.60.40.180
MF2110016	1	3.30.1140.40
MF2110017	1	3.40.30.10
MF4120004	1	2.60.40.180
MF2120007	1	2.10.109.10
MF4120002	1	2.60.40.180
MF2210013	1	2.90.10.10
MF2110027	1	2.90.10.10
MF4120007	1	2.30.30.60
MF2110010	1	2.10.90.10
MF4110002	1	2.60.40.180
MF4110003	1	2.60.40.180
MF2140012	1	2.40.10.10
MF2110022	1	2.10.90.10
MF4120003	1	2.60.40.180
MF6110001	1	3.30.70.141
MF2200009	1	2.10.90.10
MF2120019	1	1.10.140.10
MF2110014	1	2.90.10.10
MF2140009	1	3.30.70.330
MF4110001	1	2.60.40.180
MF2110015	1	2.90.10.10
MF2210010	1	2.90.10.10
MF2120013	1	2.60.40.180
MF6100001	2	1.20.5.430
MF2110003	2	1.20.5.1180
MF2120021	2	6.10.250.190
MF2110029	2	-
MF2120029	2	-
MF2100015	2	1.20.5.1160
MF3100002	2	1.20.5.340
MF2110008	2	-
MF4400001	2	1.20.5.110
MF2110009	2	1.20.5.490
MF2100006	2	1.20.5.2440
MF4140002	2	-
MF4140005	2	-
MF6140001	2	1.20.5.300
MF2120011	2	1.20.5.340
MF2100001	2	-
MF3120001	2	1.20.5.190
MF4140003	2	-
MF4200001	2	-
MF4411001	2	1.20.5.110
MF4110006	2	1.20.5.340
MF2140004	2	1.20.5.400
MF4110004	2	-
MF5110002	2	1.20.5.10
MF4411003	2	1.20.5.110
MF6240001	2	1.20.5.300
MF4410001	2	1.20.5.110
MF2220001	2	6.10.250.190
MF2110007	2	1.20.5.490
MF2110020	2	1.20.5.170
MF2110025	2	1.20.5.340
MF2110006	2	1.20.5.170
MF4130001	2	1.20.5.1060
MF3100003	2	1.20.5.1160
MF2110004	2	1.20.5.340
MF2211002	2	-
MF4410002	2	1.20.5.110
MF2201008	2	1.20.5.170
MF2110012	2	-
MF2100003	2	1.20.5.1180
MF2110001	2	-
MF2120009	2	6.10.250.790
MF2200002	2	1.20.5.1180
MF4411002	2	1.20.5.110
MF4210003	2	1.20.5.110
MF2110005	2	1.20.5.170
MF4140001	2	6.10.250.630
MF2100016	2	-
MF5110001	2	1.20.5.10
MF3300001	3	1.20.140.80
MF2120034	3	1.10.1220.10
MF2120015	3	3.40.1620.10
MF4100005	3	4.10.170.10
MF2120006	3	1.10.1220.10
MF2120004	3	1.10.1220.10
MF2120016	3	3.40.1620.10
MF2120033	3	1.10.1220.10
MF2140001	3	1.10.1220.10
MF6120001	3	3.30.429.10
MF4110009	3	4.10.170.10
MF2120024	3	3.40.1620.10
MF2140010	3	3.40.1620.10
MF2120020	3	1.10.10.60
MF4100003	3	-
MF2120002	3	1.10.1220.10
MF2120031	3	6.10.140.1550
MF2140011	3	1.10.1220.10
MF4110008	3	6.10.280.60
MF4110007	3	4.10.170.10
MF2120001	3	6.10.180.10
MF2210014	3	6.10.140.2000
MF2120010	4	3.30.160.880
MF4120006	4	3.30.160.880
MF2100011	4	4.10.280.10
MF2120012	4	-
MF2140014	4	6.10.140.1560
MF2120014	4	1.10.287.230
MF2100010	4	4.10.280.10
MF4201002	4	1.10.287.650
MF2100005	4	6.10.140.1740
MF2200012	4	1.20.1270.290
MF2100013	4	1.10.238.10
MF4201001	4	1.10.287.650
MF2220002	4	1.20.1260.20
MF2110023	4	4.10.280.10
MF2110021	4	4.10.280.10
MF2140013	4	1.10.287.230
MF2120023	4	1.10.287.160
MF2211003	4	3.30.710.10
MF2140003	4	2.40.50.140
MF2110026	4	1.20.960.30
MF2200001	4	1.10.10.1410
MF2140015	4	1.10.10.930
MF2120022	4	1.10.287.160
MF2201002	4	6.10.50.20
MF2120008	4	1.10.1270.10
MF2120032	4	1.10.10.10
MF2201003	4	6.10.140.410
MF2201005	5	1.10.20.10
MF4210002	5	1.10.287.650
MF2201006	5	1.10.20.10
MF2200008	5	1.10.20.10
MF2210004	5	1.10.20.10
MF2210009	5	1.10.20.10
MF2200015	5	1.10.20.10
MF2210003	5	1.10.20.10
MF2110002	5	1.20.5.170
MF2210002	5	1.10.20.10
MF2210015	5	1.10.20.10
MF2110028	5	1.20.890.10
MF2100002	5	1.10.10.1410
MF2210006	5	1.10.20.10
MF3140002	5	1.20.5.790
MF2200016	5	1.10.20.10
MF2200006	5	1.10.20.10
MF2200003	5	1.10.20.10
MF4140004	5	1.10.10.930
MF2211001	5	1.10.20.10
MF4120001	5	3.40.1620.10
MF2201007	5	1.10.20.10
MF2202002	5	3.90.810.10
MF2201004	5	1.10.287.650
MF2200005	5	1.10.20.10
MF2200004	5	1.10.20.10
MF2210005	5	1.10.20.10
MF2130001	5	1.10.20.10
MF2200017	5	1.10.20.10
MF2200007	5	1.10.20.10
MF2210001	5	1.10.20.10
MF2200014	5	-
MF2120030	5	1.10.1220.10
MF2200010	5	1.10.20.10
MF2202001	5	3.90.810.10
MF2210008	5	1.10.20.10
MF4210001	6	1.10.287.470
MF3100004	6	1.20.5.340
MF3110001	6	1.20.5.30
MF2120027	6	1.10.1220.80
MF2210007	6	1.20.5.4980
MF2100004	6	6.10.140.110
MF2200011	6	1.20.5.4980
MF4100002	6	4.10.280.30
MF3140001	6	1.20.5.320
MF4100004	6	4.10.170.10
MF2100017	6	1.20.5.1430
MF2120005	6	1.10.1270.10
MF2201001	6	6.10.140.20
MF2140002	6	3.30.160.330
MF2110024	6	-
MF3100001	6	1.20.5.360
MF4200002	6	-
MF2200018	6	-
MF3120002	6	6.10.250.40
MF2200013	6	-
MF2120018	6	1.10.1270.10
MF2100009	6	4.10.280.10
MF2120003	6	1.10.1220.10
MF2120025	6	1.20.5.1140
MF2120017	6	1.10.1270.10
